# Supplementary material for: Linker histone H1.8 inhibits chromatin binding of condensins and DNA topoisomerase II to tune chromosome length and individualization
Source: eLife. 2021 Aug 18;10:e68918. doi: 10.7554/eLife.68918 (PMC8416026; doi:10.7554/eLife.68918)
Supplement: Figure 1—source data 2. [file elife-68918-fig1-data2.xlsx]

## Sheet: Annotated list
Accession	Description	Gene ID	Coverage [%]	Peptides	PSMs	Unique Peptides	AAs	MW [kDa]	calc. pI	ΔIgG abundance (ion current)	ΔH1 abundance (ion current)	ΔH1/ΔIgG
'CL40282Contig1'	'Histone H2A type 2-B '	HIST2H2AB	52	7	27	4	139	14.9	10.05	1.91767e+09	1.15631e+09	0.602979
'P02281'	'Rep: Histone H2B 1.1 - Xenopus laevis (African clawed frog), complete'	H2B 1.1	75	19	65	2	126	13.9	10.32	7.83708e+08	1.14314e+09	1.45863
'CL6290Contig1'	'DNA damage-binding protein 1 '	DDB1	26	25	47	25	1140	126.8	5.24	4.70259e+08	9.1363e+07	0.194282
'CL1Contig1557'	'Histone H4 '	HIS1H4A	47	14	55	14	130	14.5	11.25	4.30448e+08	4.29859e+08	0.99863
'CL1109Contig3'	'Histone H1oo '	H1FOO	39	14	61	10	280	30.1	10.1	416469220	6.42827e+07	0.154352
'CL737Contig2'	'Aurora kinase B '	AURKB	59	22	99	6	361	41.7	9.47	3.59611e+08	2.6241e+08	0.729704
'CL9557Contig1'	'Borealin '	CDCA8	63	18	65	18	312	34.2	9.64	2.50506e+08	1.61021e+08	0.642784
'CL3922Contig1'	'Structural maintenance of chromosomes protein 4 '	SMC4	51	62	197	63	1290	147	7.37	2.33985e+08	4.28429e+08	1.83101
'CL1761Contig5'	'Inner centromere protein '	'INCENP'	34	34	87	2	874	101.2	9.6	2.26754e+08	1.60432e+08	0.707515
'CL3055Contig1'	'Structural maintenance of chromosomes protein 2 '	'SMC2'	51	64	198	64	1203	136.3	8.27	2.25926e+08	4.22744e+08	1.87116
'P25183'	'Rep: Regulator of chromosome condensation - Xenopus laevis (African clawed frog), complete'	RCC1	50	17	75	12	420	44.6	6.4	2.0823e+08	1.2246e+08	0.588101
'CL872Contig5'	'GTP-binding nuclear protein Ran '	'RAN'	31	8	36	8	226	25.6	8.7	1.64783e+08	8.22624e+07	0.499217
'CL70Contig10'	'DNA topoisomerase 2-alpha '	'TOP2A'	38	62	202	48	1579	178.5	8.78	1.26358e+08	3.95804e+08	3.13239
'CL6176Contig1'	'Condensin complex subunit 3 '	'NCAPG'	43	43	124	43	1034	115.7	5.25	102786677	2.61168e+08	2.54087
'CL3635Contig1'	'Importin subunit alpha-2 '	'KPNA2'	29	13	55	4	522	57.7	5.41	7.16266e+07	6.51886e+07	0.910117
'CL2898Contig1'	'Condensin complex subunit 1 '	'NCAPD2'	45	53	156	3	1364	154	5.94	6.94287e+07	2.53152e+08	3.64621
'CL836Contig2'	'Transcriptional regulator ATRX '	'ATRX'	21	41	102	41	2264	255.6	6.48	6.7753e+07	8.79642e+07	1.29831
'CL1242Contig2'	'DNA replication licensing factor MCM4 '	'MCM4'	45	34	112	33	863	97.1	7.05	6.76413e+07	8.91099e+07	1.31739
'CL1917Contig1'	'Importin subunit beta-1 '	'KPNB1'	38	25	68	2	876	97.1	4.79	6.28575e+07	4.30411e+07	0.68474
'zeinaSSns_comp386237_c1_seq2'	'Histone H2A.J '	'H2AFJ'	30	4	19	1	153	16.4	11.08	61602894	9.7068e+07	1.57571
'CL6320Contig1'	'Protein CIP2A '	'KIAA1524'	24	21	48	21	906	101.6	6.93	5.54783e+07	3.31858e+07	0.598177
'CL3273Contig1'	'Replication protein A 70 kDa DNA-binding subunit '	'RPA1'	40	24	62	24	609	67	8.06	5.43968e+07	4.23258e+07	0.778093
'CL208Contig6'	'Bromodomain and WD repeat-containing protein 3 '	'BRWD3'	21	29	54	29	1552	175.7	6.23	51025675	1.80127e+07	0.353012
'CL365Contig8'	'Bromodomain adjacent to zinc finger domain protein 1A '	'BAZ1A'	22	33	103	12	1569	179.7	6.86	5.02934e+07	7.75812e+07	1.54257
'CL1360Contig5'	'SWI/SNF-related matrix-associated actin-dependent regulator of chromatin subfamily A member 5 '	'SMARCA5'	39	39	111	8	1046	122	6.89	4.75714e+07	1.30857e+08	2.75076
'CL5379Contig1'	'DNA replication licensing factor MCM6 '	'MCM6'	35	28	85	27	821	92.6	5.22	4.57492e+07	7.27865e+07	1.59099
'CL4459Contig1'	'DNA replication licensing factor MCM2 '	'MCM2'	31	23	60	23	886	100.2	5.36	3.79742e+07	5.52833e+07	1.45581
'CL8202Contig1'	'MCM3 minichromosome maintenance deficient 3 (S. cerevisiae), isoform CRA_b '	'MCM3'	37	27	67	27	807	90.3	6.79	3.74988e+07	6.39279e+07	1.7048
'CL2088Contig4'	'Condensin complex subunit 2 '	'NCAPH'	26	17	48	8	689	77.2	5.39	3.4826e+07	7.71574e+07	2.21551
'CL4917Contig1'	'Dopamine receptor interacting protein 4 '	'DRIP4'	22	18	41	18	893	99	6.52	3.28854e+07	1.08165e+08	3.28913
'CL64Contig17'	'Lymphoid-specific helicase '	'HELLS'	7	4	5	4	587	67.7	8.46	32504558	1.22764e+07	0.377682
'CL1887Contig2'	'Regulator of chromosome condensation '	'RCC1'	35	11	55	6	495	53.5	8.75	3.08899e+07	2.48285e+07	0.803776
'CL8042Contig1'	'DNA topoisomerase 2-binding protein 1 '	'TOPBP1'	14	19	30	19	1544	172.8	6.87	2.87094e+07	1.3936e+07	0.485416
'CL2520Contig2'	'Telomere-associated protein RIF1 '	'RIF1'	4	8	8	8	2298	254.1	5.59	2.5312e+07	162455	0.00641809
'CL2493Contig1'	'Protein HIRA '	'HIRA'	16	14	27	14	1051	116.3	8.37	2.34971e+07	2.46571e+07	1.04937
'CL155Contig4'	'DNA replication licensing factor MCM7 '	'MCM7'	40	26	75	26	720	81.7	6.37	2.25649e+07	4.90587e+07	2.17411
'CL1611Contig2'	'DNA replication licensing factor MCM5 '	'MCM5'	40	25	60	25	735	82.4	8.28	2.15415e+07	5.68899e+07	2.64095
'CL814Contig4'	'Serine/threonine-protein phosphatase 2A 65 kDa regulatory subunit A alpha isoform '	'PPP2R1A'	31	17	34	10	597	66.3	5.12	1.9844e+07	1.13749e+07	0.573217
'dsrrswapns_comp216997_c8_seq1'	'Exportin-2 '	'CSE1L'	7	7	12	7	971	110	5.4	1.37749e+07	3.00192e+06	0.217926
'CL1206Contig3'	'Probable ATP-dependent RNA helicase DDX6 '	'DDX6'	13	5	21	1	481	54.1	8.87	1.36534e+07	4.77765e+06	0.349924
'CL1661Contig2'	'FACT complex subunit SPT16 '	'SUPT16H'	19	18	30	18	1035	118.4	5.59	1.35466e+07	2.44286e+07	1.8033
'CL3864Contig2'	'Polyadenylate-binding protein 1 '	'PABPC1'	12	8	21	2	666	74.6	9.32	1.31572e+07	3.34738e+06	0.254414
'CL2463Contig2'	'Baculoviral IAP repeat-containing protein 5 '	'BIRC5'	49	6	16	4	160	18.8	5.12	1.25541e+07	9.2614e+06	0.737719
'CL41Contig18'	'FACT complex subunit SSRP1 '	'SSRP1'	29	18	41	18	722	81.9	6.99	1.18601e+07	2.05981e+07	1.73675
'Q70PC5'	'Rep: Importin alpha 5.1 protein - Xenopus laevis (African clawed frog), complete'	Imp 5.1	8	4	9	4	537	59.7	5.02	1.1357e+07	2.88288e+06	0.253842
'CL781Contig4'	'Nuclear pore complex protein Nup98-Nup96 '	'NUP98'	11	19	24	19	1793	194.9	6.21	1.06217e+07	2.51543e+06	0.23682
'CL1Contig1093'	'Histone H2B type 1-J '	'HIST1H2BJ'	75	18	58	1	126	13.9	10.32	10536289	2.183e+07	2.07189
'CL768Contig5'	'ATPase family AAA domain-containing protein 2B '	'ATAD2B'	15	19	32	11	1405	158.8	6.87	9.70717e+06	7.64454e+06	0.787514
'zeinaSSns_comp389630_c0_seq1'	'Importin subunit beta-1 '	'KPNB1'	37	24	64	1	876	97.1	4.79	9.35658e+06	932431	0.0996551
'CL5289Contig1'	'Shugoshin-like 1 '	'SGOL1'	32	17	30	17	666	74.9	9.54	9.09296e+06	1.62686e+07	1.78914
'CL2440Contig2'	'RuvB-like 1 '	'RUVBL1'	21	7	11	7	456	50.3	6.42	8.41058e+06	162455	0.0193155
'CL7990Contig1'	'Mediator of DNA damage checkpoint protein 1 '	'MDC1'	14	27	47	27	2123	236.1	5	7.99206e+06	1.99954e+07	2.50191
'CL6439Contig1'	'Fanconi anemia group I protein '	'FANCI'	17	21	46	21	1337	149.4	6.52	7.64479e+06	1.92593e+07	2.51927
'CL1Contig1661'	'Ubinuclein-2 '	'UBN2'	10	12	21	10	1173	127.4	9.45	7.49418e+06	1.25991e+07	1.68119
'CL118Contig13'	'Mitotic checkpoint protein BUB3 '	'BUB3'	12	3	4	3	330	37.2	6.68	7.33755e+06	1.32024e+06	0.179929
'dsrrswapns_comp211102_c0_seq3'	'Borealin '	'CDCA8'	16	5	16	5	294	32.8	9.99	7.12756e+06	4.56937e+06	0.641084
'CL3635Contig2'	'Importin subunit alpha-8 '	'KPNA7'	22	10	43	1	533	59	5.36	7.10105e+06	2.11544e+06	0.297905
'CL9669Contig1'	'Replication protein A 32 kDa subunit '	'RPA2'	23	5	8	5	276	29.4	6.05	6.60043e+06	5.01711e+06	0.760118
'CL253Contig8'	'14-3-3 protein zeta/delta '	'YWHAZ'	10	3	10	3	245	27.7	4.79	6.23028e+06	1.68062e+06	0.26975
'CL4769Contig2'	'Core histone macro-H2A.2 '	'H2AFY2'	24	8	12	8	371	40	9.86	6.13049e+06	8.62718e+06	1.40726
'CL1299Contig4'	'Shugoshin-like 2 '	'SGOL2'	7	7	15	7	1015	114.3	7.55	5.9851e+06	2.69793e+06	0.450775
'CL26Contig4'	'Nucleoprotein TPR '	'TPR'	5	13	13	13	2349	266.7	5.1	5.61012e+06	2.92344e+06	0.521101
'CL5143Contig1'	'Nuclear pore complex protein Nup133 '	'NUP133'	6	6	6	5	1154	128.8	5.31	5.22182e+06	656240	0.125673
'CL1Contig235'	'Histone H1.3 '	'HIST1H1D'	21	4	5	2	234	23.8	10.74	5190866	1.14286e+07	2.20168
'CL3011Contig2'	'Nuclear pore complex protein Nup214 '	'NUP214'	3	6	11	6	2035	208.5	8.4	5.14677e+06	1.12753e+06	0.219075
'CL7465Contig1'	'Histone chaperone ASF1A '	'ASF1A'	8	1	1	1	200	22.4	4.5	5.04355e+06	1.15357e+06	0.228721
'CL15621Contig1'	'Histone H2A.x '	'H2AFX'	30	4	12	1	139	14.9	11.05	4.9517e+06	2.53759e+06	0.512469
'CL2103Contig2'	'Tyrosine-protein kinase BAZ1B '	'BAZ1B'	17	23	39	2	1443	166.2	6.89	4.81618e+06	4.59679e+07	9.54447
'CL866Contig3'	'Heterogeneous nuclear ribonucleoprotein H '	'HNRNPH1'	4	2	3	1	428	46.7	6.35	4.79105e+06	1.24125e+06	0.259077
'CL365Contig3'	'Bromodomain adjacent to zinc finger domain protein 1A '	'BAZ1A'	15	23	74	2	1734	198.8	5.43	4623112	3.89519e+06	0.842548
'CL6459Contig1'	'Fanconi anemia group D2 protein '	'FANCD2'	17	20	37	20	1443	162.5	5.59	4.53889e+06	1.71928e+07	3.78789
'CL2088Contig1'	'Condensin complex subunit 2 '	'NCAPH'	20	13	40	4	738	82.1	5.38	4.11139e+06	8.31654e+06	2.02281
'CL91Contig20'	'Nucleolar transcription factor 1 '	'UBTF'	26	17	34	2	615	72.7	9.19	3.96729e+06	2.16522e+06	0.545768
'CL801Contig2'	'Elongation factor 2 '	'EEF2'	3	3	5	3	916	101.5	6.96	3.88688e+06	495342	0.127439
'CL2898Contig2'	'Condensin complex subunit 1 '	'NCAPD2'	46	53	154	3	1359	153.4	5.99	3.83614e+06	5.12476e+06	1.33592
'CL1313Contig6'	'Histone-binding protein RBBP7 '	'RBBP7'	30	10	17	10	430	48.3	5.06	3.55892e+06	8.51622e+06	2.39292
'CL1906Contig4'	'Protein LSM14 homolog B '	'LSM14B'	5	2	4	2	422	46.1	9.35	3.37005e+06	162455	0.0482055
'CL7361Contig1'	'X-ray repair cross-complementing protein 5 '	'XRCC5'	3	2	5	2	744	84.2	5.15	3.23628e+06	1.04483e+06	0.322848
'CL1203Contig1'	'Metastasis-associated protein MTA2 '	'MTA2'	10	7	12	7	686	77	9.72	3.20001e+06	6.5966e+06	2.06143
'CL1494Contig1'	'Ran GTPase-activating protein 1 '	'RANGAP1'	13	7	15	7	584	63.4	4.67	3.06336e+06	1.72785e+06	0.564038
'CL14Contig23'	'Guanine nucleotide-binding protein subunit beta-4 '	'GNB4'	6	2	3	2	340	37.5	6.13	2.89976e+06	1.40387e+06	0.484134
'CL1324Contig3'	'Lamin-B1 '	'LMNB1'	10	6	6	3	584	66.5	5.05	2.76737e+06	356174	0.128705
'CL589Contig2'	'Histone deacetylase 1 '	'HDAC1'	8	4	15	1	491	56	6.21	2.71981e+06	2.68592e+06	0.987538
'CL13417Contig1'	'Cell division cycle-associated protein 7 '	'CDCA7'	14	5	5	5	333	37.8	8.62	2.45885e+06	750228	0.305114
'CL377Contig6'	'Guanine nucleotide-binding protein G(i) subunit alpha-2 '	'GNAI2'	6	2	2	2	421	47.2	6.18	2.41509e+06	912995	0.378037
'CL8226Contig1'	'DNA excision repair protein ERCC-6-like '	'ERCC6L'	11	14	22	13	1349	152.8	4.94	2.36566e+06	3.86099e+06	1.6321
'CL953Contig1'	'Histone H2A.V '	'H2AFV'	34	6	11	2	128	13.5	10.58	2.34202e+06	1.37963e+07	5.89077
'CL1223Contig1'	'Nuclear pore complex protein Nup155 '	'NUP155'	5	5	5	5	1388	154.7	6.23	2.32904e+06	1.08192e+06	0.464536
'CL9266Contig1'	'Nuclear pore complex protein Nup85 '	'NUP85'	11	7	8	7	668	76.7	6.15	2.26833e+06	642620	0.283301
'CL141Contig14'	'Kinesin-like protein KIF2C '	'KIF2C'	6	4	4	4	774	87.7	7.34	2.1706e+06	162455	0.0748434
'CL3327Contig1'	'Nuclear pore membrane glycoprotein 210 '	'NUP210'	6	8	10	8	1892	207.1	6.58	2.05313e+06	758700	0.369534
'CL6420Contig1'	'Structural maintenance of chromosomes protein 6 '	'SMC6'	6	7	10	7	1128	130.4	7.64	1.98583e+06	1.44801e+06	0.729173
'CL113Contig10'	'SWI/SNF complex subunit SMARCC1 '	'SMARCC1'	4	5	6	5	1224	136.2	5.36	1.96581e+06	594357	0.302347
'dsrrswapns_comp211624_c0_seq5'	'Nuclear pore complex protein Nup50 '	'NUP50'	9	4	5	4	436	46.8	7.65	1.95183e+06	537564	0.275415
'P06180'	'Rep: Histone-binding protein N1/N2 - Xenopus laevis (African clawed frog), partial (13%)'	'err'	17	2	2	2	143	15.9	4.67	1.92894e+06	472723	0.245069
'CL149Contig6'	'Chromodomain-helicase-DNA-binding protein 4 '	'CHD4'	4	7	15	7	1894	214.7	5.9	1.90735e+06	1.8646e+06	0.97759
'CL5153Contig1'	'Nuclear pore complex protein Nup93 '	'NUP93'	21	13	17	13	820	93.4	5.92	1.85534e+06	624437	0.336562
'P70032'	'Rep: Serine/threonine-protein kinase PLK1 - Xenopus laevis (African clawed frog), complete'	'err'	4	3	3	3	598	68.2	8.82	1.8536e+06	777373	0.419386
'CL1451Contig1'	'Nucleoporin SEH1 '	'SEH1L'	4	2	4	2	378	41.7	8.57	1.76044e+06	912055	0.518083
'CL2663Contig3'	'Zinc finger protein 207 '	'ZNF207'	4	2	4	2	476	51.2	9.23	1.63281e+06	405673	0.248451
'CL1424Contig3'	'Centromere-associated protein E '	'CENPE'	2	5	6	5	3316	380.9	5.01	1617292	319856	0.197773
'CL1175Contig2'	'E3 SUMO-protein ligase RanBP2 '	'RANBP2'	6	10	10	10	1365	149.5	5.07	1.50736e+06	162455	0.107775
'CL119Contig5'	'Antigen KI-67 '	'MKI67'	2	5	6	5	2569	277.5	10.4	1.45481e+06	3.42253e+06	2.35255
'CL4049Contig1'	'Serine/threonine-protein phosphatase 2A 65 kDa regulatory subunit A alpha isoform '	'PPP2R1A'	14	8	11	1	590	65.5	5.08	1.43272e+06	392193	0.27374
'CL3388Contig1'	'Nuclear pore complex protein Nup88 '	'NUP88'	6	4	5	4	726	82.4	6.37	1.31866e+06	304781	0.23113
'zeinaSSns_comp370372_c0_seq2'	'Histone H3.3 '	'H3F3A'	33	8	20	1	136	15.3	11.27	1.11501e+06	1.85372e+06	1.66251
'CL985Contig3'	'Protein ELYS '	'AHCTF1'	1	3	4	2	2194	244.4	5.88	1.08122e+06	239011	0.221058
'CL451Contig4'	'Zinc finger protein 638 '	'ZNF638'	1	2	2	1	2284	253	6.2	1.06845e+06	344028	0.321989
'CL1964Contig2'	'Cullin-4A '	'CUL4A'	13	9	10	6	753	87.9	8.28	900000	476015	0.528906
'CL4567Contig2'	'Transcription termination factor 2 '	'TTF2'	13	13	20	12	1187	131.6	8.51	900000	8.95816e+06	9.95351
'CL1Contig978'	'Histone H1.3 '	'HIST1H1D'	14	3	4	1	220	22.3	10.84	900000	6.13773e+07	68.197
'CL4464Contig1'	'E3 SUMO-protein ligase RanBP2 '	'RANBP2'	6	4	4	2	610	66.9	8	900000	508900	0.565444
'CL7418Contig1'	'Nuclear pore complex protein Nup107 '	'NUP107'	10	9	10	9	953	109.4	5.59	900000	162455	0.180505
'CL6300Contig1'	'Nucleoporin Nup43 '	'NUP43'	5	1	1	1	375	41.7	5.92	900000	162455	0.180505
'CL704Contig4'	'Nuclear pore complex protein Nup153 '	'NUP153'	3	4	4	1	1605	164.9	9.03	900000	162455	0.180505
'CL1693Contig2'	'Nucleoporin p58/p45 '	'NUPL1'	4	2	2	1	599	60.8	9.6	900000	162455	0.180505
'CL1569Contig2'	'Nucleoporin NUP188 homolog '	'NUP188'	2	4	4	4	1739	195.5	6.7	900000	162455	0.180505
'dsrrswapns_comp198589_c0_seq2'	'Serine/threonine-protein kinase ATR '	'ATR'	1	3	4	3	2663	302.5	7.47	900000	596207	0.662452
'CL2337Contig2'	'Structural maintenance of chromosomes protein 3 '	'SMC3'	9	11	16	11	1209	140.6	7.44	900000	1.1543e+06	1.28255
'CL4464Contig2'	'E3 SUMO-protein ligase RanBP2 '	'RANBP2'	5	7	8	5	1502	168.5	7.11	900000	946831	1.05203
'CL1065Contig2'	'Lamin A/C '	'LMNA'	41	23	26	8	586	67.6	6.29	900000	162455	0.180505
'CL1943Contig5'	'Nucleoporin NUP53 '	'NUP35'	8	2	2	2	320	34.2	9.32	900000	162455	0.180505
'CL1560Contig3'	'Nuclear pore complex protein Nup205 '	'NUP205'	7	12	12	12	2011	227.4	6.51	900000	162455	0.180505
'CL704Contig3'	'NUP153 variant protein (Fragment) '	'NUP153 VARIANT PROTEIN'	8	5	5	5	934	94.3	8.47	900000	162455	0.180505
'CL172Contig3'	'Transportin-1 '	'TNPO1'	2	2	2	2	947	107.1	5.11	900000	162455	0.180505
'CL868Contig2'	'POM121-like protein 2 '	'POM121L2'	6	5	5	5	902	97.2	9.31	900000	162455	0.180505
'CL3619Contig2'	'Nucleoporin p54 '	'NUP54'	8	4	4	4	535	58.5	7.34	900000	162455	0.180505
'CL704Contig1'	'Nuclear pore complex protein Nup153 '	'NUP153'	5	7	7	4	1590	163.5	9.03	900000	162455	0.180505
'CL722Contig3'	'Nuclear pore complex protein Nup160 '	'NUP160'	8	9	9	9	1435	162.4	5.58	900000	910526	1.0117
'CL13252Contig1'	'Putative GTP-binding protein 6 '	'GTPBP6'	2	1	3	1	527	59.1	8.48	900000	5.22873e+06	5.8097
'CL17121Contig1'	'Histone H2A type 2-B '	'HIST2H2AB'	24	5	15	2	143	15.2	10.9	900000	2.19447e+06	2.4383
'CL1954Contig2'	'ATPase family AAA domain-containing protein 2 '	'ATAD2'	9	11	22	7	1362	154.7	6.3	900000	162455	0.180505
'Q6DJF7'	'Rep: 60S ribosomal protein L6 - Xenopus laevis (African clawed frog), partial (98%)'	'err'	10	3	6	1	252	28.9	10.77	900000	162455	0.180505
'CL1360Contig3'	'SWI/SNF-related matrix-associated actin-dependent regulator of chromatin subfamily A member 5 '	'SMARCA5'	33	35	100	4	1047	122.2	6.8	900000	3.14749e+06	3.49721
'CL2771Contig1'	'Structural maintenance of chromosomes protein 1A '	'SMC1A'	3	4	9	4	1232	142.6	7.66	900000	1.83609e+06	2.0401
'CL3870Contig2'	'N-alpha acetyl transferase 40 '	'NAA40'	42	10	23	4	236	27.1	7.58	900000	8.72151e+06	9.69057
'CL3Contig52'	'Keratin, type II cytoskeletal 8 '	'KRT8'	50	30	112	5	507	56	5.3	900000	2.60026e+06	2.88918
'CL2226Contig1'	'Zinc fingers and homeoboxes protein 3 '	'ZHX3'	13	11	16	11	925	103.5	6.4	900000	4.7002e+06	5.22244
'CL4286Contig1'	'ITLN2 protein '	'ITLN2'	19	6	19	2	313	34.3	5.67	900000	162455	0.180505
'CL768Contig4'	'ATPase family AAA domain-containing protein 2B '	'ATAD2B'	14	7	11	3	618	70.2	5.16	900000	352491	0.391657
'CL2217Contig3'	'Tudor and KH domain-containing protein '	'TDRKH'	2	1	2	1	719	79.7	5.27	900000	860679	0.95631
'CL4099Contig1'	'RuvB-like 2 '	'RUVBL2'	10	4	9	4	462	51.1	5.64	900000	1.01309e+06	1.12565
'CL100Contig17'	'Nucleosome assembly protein 1-like 1 '	'NAP1L1'	4	2	2	2	457	52.5	4.6	900000	162455	0.180505
'CL2390Contig1'	'Cohesin subunit SA-1 '	'STAG1'	1	2	3	2	1265	145.1	5.52	900000	321989	0.357766
'dsrrswapns_comp214697_c1_seq3'	'Lamin-B1 '	'LMNB1'	6	4	4	1	583	66.2	4.94	900000	162455	0.180505
'CL5Contig25'	'Lamina-associated polypeptide 2, isoforms beta/gamma '	'TMPO'	5	3	6	3	557	62.8	6.79	900000	764609	0.849565
'CL589Contig3'	'Histone deacetylase 1 '	'HDAC1'	8	4	14	1	480	54.9	5.76	900000	830296	0.922551
'CL233Contig4'	'Replication factor C subunit 3 '	'RFC3'	8	3	3	3	356	40.3	8.41	900000	418540	0.465045
'CL9634Contig1'	'Putative helicase MOV-10 '	'MOV10'	3	3	3	3	988	112.2	8.54	900000	415426	0.461584
'CL62Contig9'	'Chromodomain-helicase-DNA-binding protein 7 '	'CHD7'	1	2	2	2	2927	328.6	6.29	900000	372119	0.413466
'CL3117Contig2'	'Phenylalanine--tRNA ligase beta subunit '	'FARSB'	7	4	5	4	588	65.7	6.05	900000	413421	0.459357
'CL2306Contig3'	'Zona pellucida sperm-binding protein 4 '	'ZP4'	3	2	4	2	545	59.7	6.92	900000	424685	0.471872
'A7YY10'	'Rep: Zgc:171772 protein - Danio rerio (Zebrafish) (Brachydanio rerio), complete'	'err'	18	2	3	2	93	10.3	10.33	900000	358633	0.398481
'CL3308Contig1'	'Poly [ADP-ribose] polymerase 1 '	'PARP1'	2	1	1	1	1046	116.2	8.59	900000	162455	0.180505
'CL6319Contig1'	'Leucyl-cystinyl aminopeptidase '	'LNPEP'	1	1	1	1	1024	116.1	5.52	900000	162455	0.180505
'CL4114Contig1'	'Protein lunapark '	'LNP'	3	1	2	1	438	49.5	4.96	900000	162455	0.180505
'Q7T0P5'	'Rep: MGC69110 protein - Xenopus laevis (African clawed frog), partial (88%)'	'err'	9	1	2	1	89	10.7	7.24	900000	162455	0.180505
'CL451Contig7'	'Zinc finger protein 638 '	'ZNF638'	1	2	2	1	1777	194.7	8.73	900000	162455	0.180505
'CL5927Contig2'	'Bleomycin hydrolase '	'BLMH'	2	1	1	1	484	55.7	6.19	900000	162455	0.180505
'CL20Contig20'	'Actin-related protein 2 '	'ACTR2'	7	2	3	2	394	44.6	6.55	900000	162455	0.180505
'CL119Contig1'	'Antigen KI-67 '	'MKI67'	0	1	1	1	2182	235.3	10.33	900000	162455	0.180505
'CL5420Contig2'	'Proteasome subunit beta type-6 '	'PSMB6'	4	1	2	1	257	27.5	6.52	900000	162455	0.180505
'CL240Contig4'	'Putative uncharacterized protein DKFZp686C24207 '	'DKFZP686C24207'	2	1	1	1	729	82.1	5.38	900000	162455	0.180505
'Q66IN5'	'Rep: MGC86492 protein - Xenopus laevis (African clawed frog), partial (42%)'	'err'	4	1	1	1	258	28	4.42	900000	162455	0.180505
'CL5367Contig1'	'Signal recognition particle receptor subunit beta '	'SRPRB'	3	1	4	1	266	29.6	8.72	900000	162455	0.180505
'CL1Contig1209'	'ATP-dependent RNA helicase DDX1 '	'DDX1'	1	1	1	1	740	82.3	7.37	900000	162455	0.180505
'CL6551Contig2'	'Proteasome subunit beta type-5 '	'PSMB5'	5	1	1	1	266	29.3	6.54	900000	162455	0.180505
'CL5426Contig1'	'Proteasome subunit beta type-1 '	'PSMB1'	6	1	1	1	239	26.6	7.02	900000	162455	0.180505
'CL1930Contig6'	'Remodeling and spacing factor 1 '	'RSF1'	1	1	2	1	1449	164.5	5.05	900000	162455	0.180505
'dsrrswapns_comp213483_c2_seq6'	'Dual specificity mitogen-activated protein kinase kinase 1 '	'MAP2K1'	3	1	1	1	395	43.7	6.99	900000	162455	0.180505
'Q5EBE0'	'Rep: MGC108409 protein - Xenopus tropicalis (Western clawed frog) (Silurana tropicalis), partial (24%)'	'err'	13	2	3	2	144	15.6	9.26	900000	162455	0.180505
'CL2698Contig3'	'26S proteasome non-ATPase regulatory subunit 6 '	'PSMD6'	3	2	2	2	405	47.1	6.01	900000	162455	0.180505
'zeinaSSns_comp388101_c0_seq6'	'Transcriptional repressor p66-alpha '	'GATAD2A'	4	2	2	2	603	66	10.11	900000	162455	0.180505
'Q6IRP6'	'Rep: MGC83068 protein - Xenopus laevis (African clawed frog), partial (34%)'	'err'	9	1	1	1	116	13.4	6.06	900000	162455	0.180505
'CL4383Contig1'	'Nicalin '	'NCLN'	3	2	4	2	560	63.4	6.25	900000	162455	0.180505
'Q6PAF4'	'Rep: Non-structural maintenance of chromosomes element 1 homolog - Xenopus laevis (African clawed frog), partial (50%)'	'err'	19	2	3	1	149	17.1	5.91	900000	162455	0.180505
'CL13357Contig1'	'Transmembrane protein 199 '	'TMEM199'	7	1	1	1	192	21.3	7.43	900000	162455	0.180505
'CL1501Contig1'	'NADH dehydrogenase [ubiquinone] 1 alpha subcomplex subunit 8 '	'NDUFA8'	15	2	4	2	172	19.9	7.64	900000	162455	0.180505
'CL5243Contig2'	'Polypeptide N-acetylgalactosaminyltransferase 2 '	'GALNT2'	3	2	4	2	560	63.9	8.1	900000	162455	0.180505
'Q6GQ21'	'Rep: Peptidyl-prolyl cis-trans isomerase - Xenopus laevis (African clawed frog), partial (87%)'	'err'	24	2	2	2	104	11.9	9.29	900000	162455	0.180505
'CL192Contig1'	'Importin subunit alpha-2 '	'KPNA2'	3	2	2	2	526	57.6	5.35	900000	162455	0.180505
'CL5443Contig3'	'Non-structural maintenance of chromosomes element 4 homolog A '	'NSMCE4A'	3	1	1	1	380	43.2	5.83	900000	162455	0.180505
'Q9DED4'	'Rep: Cold-inducible RNA binding protein 2 - Xenopus laevis (African clawed frog), complete'	'err'	13	2	2	2	166	17.8	9.13	900000	162455	0.180505
'Q6PF20'	'Rep: Proliferating cell nuclear antigen - Xenopus laevis (African clawed frog), partial (57%)'	'err'	11	2	2	2	132	14.6	4.56	900000	162455	0.180505
'CL12884Contig1'	'Programmed cell death protein 4 '	'PDCD4'	4	2	2	2	434	48.2	6.24	900000	162455	0.180505
'CL44Contig11'	'Protein LYRIC '	'MTDH'	4	2	2	1	566	62.4	8.51	900000	162455	0.180505
'Q6GQB6'	'Rep: MGC80186 protein - Xenopus laevis (African clawed frog), partial (78%)'	'err'	6	2	4	1	365	41.1	5.1	900000	162455	0.180505
'CL4140Contig1'	'Dynactin subunit 1 '	'DCTN1'	2	2	3	2	1269	141.1	5.59	900000	162455	0.180505
'CL7383Contig1'	'Delta-1-pyrroline-5-carboxylate synthase '	'ALDH18A1'	3	2	4	2	815	89.2	7.36	900000	162455	0.180505
'A1L3J7'	'Rep: LOC100037025 protein - Xenopus laevis (African clawed frog), partial (22%)'	'err'	26	2	2	1	161	18.7	7.14	900000	162455	0.180505
'CL223Contig4'	'Isocitrate dehydrogenase [NAD] subunit gamma, mitochondrial '	'IDH3G'	8	2	2	2	402	44	9.04	900000	162455	0.180505
'CL5496Contig2'	'Oligosaccharyltransferase complex subunit OSTC '	'OSTC'	8	1	3	1	149	16.8	9.13	900000	162455	0.180505
'CL754Contig6'	'Uroplakin-1a '	'UPK1A'	7	1	3	1	252	28.5	6.51	900000	162455	0.180505
'CL6192Contig1'	'Receptor expression-enhancing protein 6 '	'REEP6'	18	2	4	2	188	21.4	8.5	900000	162455	0.180505
'CL5549Contig1'	'Cytoskeleton-associated protein 4 '	'CKAP4'	7	3	3	3	548	60.7	5.01	900000	162455	0.180505
'Q9YHD8'	'Rep: Myosin heavy chain - Rana catesbeiana (Bull frog), partial (19%)'	'err'	8	1	1	1	143	16.6	7.42	900000	162455	0.180505
'dsrrswapns_comp211475_c1_seq18'	'Heterogeneous nuclear ribonucleoprotein H '	'HNRNPH1'	5	2	4	1	456	49.6	6.42	900000	162455	0.180505
'A0A8M2'	'Rep: RAP55 protein - Xenopus laevis (African clawed frog), partial (53%)'	'err'	5	1	2	1	257	28.5	9.67	900000	162455	0.180505
''	'err'	'err'	16	1	4	1	125	13.4	9.61	900000	162455	0.180505
'CL19302Contig1'	'Annexin A1 '	'ANXA1'	4	1	1	1	358	39.4	8.53	900000	162455	0.180505
'CL4816Contig1'	'Electron transfer flavoprotein subunit alpha, mitochondrial '	'ETFA'	6	2	2	2	344	36.4	8.28	900000	162455	0.180505
'P18709'	'Rep: Vitellogenin-A2 precursor (VTG A2) [Contains: Lipovitellin I; Lipovitellin II; Phosvitin] - Xenopus laevis (African clawed frog), partial (6%)'	'err'	29	2	3	1	82	9.1	6.05	900000	162455	0.180505
'CL19200Contig1'	'Reticulon-3 '	'RTN3'	12	2	2	1	214	23.3	9.19	900000	162455	0.180505
'Q5EAX5'	'Rep: MGC84997 protein - Xenopus laevis (African clawed frog), partial (36%)'	'err'	9	2	2	1	211	23.5	8.79	900000	162455	0.180505
'CL13300Contig1'	'Methylcrotonoyl-CoA carboxylase beta chain, mitochondrial '	'MCCC2'	8	2	2	2	562	61.3	8.25	900000	162455	0.180505
'CL4515Contig1'	'Nucleoporin Nup37 '	'NUP37'	7	2	2	2	326	36.5	6.52	900000	162455	0.180505
'CL43Contig6'	'Desmoplakin '	'DSP'	3	3	6	1	980	116.6	7.11	900000	162455	0.180505
'CL6675Contig1'	'Long-chain specific acyl-CoA dehydrogenase, mitochondrial '	'ACADL'	8	3	3	3	444	49.2	7.96	900000	162455	0.180505
'CL8746Contig1'	'ATP synthase subunit delta, mitochondrial '	'ATP5D'	9	1	3	1	158	16.5	4.79	900000	162455	0.180505
'CL1026Contig6'	'Microtubule-associated protein RP/EB family member 1 '	'MAPRE1'	14	3	5	3	295	32.8	5.48	900000	162455	0.180505
'CL8426Contig1'	'Mitochondrial carnitine/acylcarnitine carrier protein '	'SLC25A20'	10	3	5	3	301	32.8	9.38	900000	162455	0.180505
'A2BD73'	'Rep: LOC100037109 protein - Xenopus laevis (African clawed frog), partial (84%)'	'err'	17	2	4	2	140	16.8	6.54	900000	162455	0.180505
'Q6DJF7'	'Rep: 60S ribosomal protein L6 - Xenopus laevis (African clawed frog), partial (96%)'	'err'	11	3	7	1	254	29.2	10.29	900000	162455	0.180505
'CL1152Contig1'	'Pyruvate kinase isozymes M1/M2 '	'PKM'	8	4	10	2	527	57.4	7.5	900000	162455	0.180505
'CL3171Contig1'	'60S ribosomal protein L7 '	'RPL7'	27	3	9	1	114	13.2	9.91	900000	162455	0.180505
'CL4107Contig1'	'Protein disulfide-isomerase TMX3 '	'TMX3'	8	3	4	3	417	47.3	4.87	900000	162455	0.180505
'Q6NU46'	'Rep: MGC81256 protein - Xenopus laevis (African clawed frog), partial (47%)'	'err'	27	5	6	1	198	21.1	9.44	900000	162455	0.180505
'dsrrswapns_comp209780_c3_seq1'	'Aminoacyl tRNA synthase complex-interacting multifunctional protein 1 '	'AIMP1'	12	3	3	3	304	33.2	8.94	900000	162455	0.180505
'CL2709Contig1'	'ITPR1 protein '	'ITPR1'	2	5	5	5	2693	306.5	6.27	900000	162455	0.180505
'dsrrswapns_comp208634_c0_seq2'	'Saccharopine dehydrogenase-like oxidoreductase '	'SCCPDH'	11	4	5	4	456	49.6	8.92	900000	162455	0.180505
'CL3003Contig2'	'Dolichyl-diphosphooligosaccharide--protein glycosyltransferase 48 kDa subunit '	'DDOST'	30	2	5	1	118	13.9	9.09	900000	162455	0.180505
'CL1565Contig1'	'Pyruvate dehydrogenase E1 component subunit beta, mitochondrial '	'PDHB'	14	4	5	1	363	39.5	6.06	900000	162455	0.180505
'CL9Contig35'	'Long-chain-fatty-acid--CoA ligase 1 '	'ACSL1'	6	5	7	1	698	78.3	7.11	900000	162455	0.180505
'UPI000'	'Rep: Nuclear pore complex protein Nup133 (Nucleoporin Nup133) (133 kDa nucleoporin). - Xenopus tropicalis, partial (22%)'	'err'	12	2	3	1	243	28.1	5.02	900000	162455	0.180505
'CL5140Contig2'	'Ras-related protein Rab-5C '	'RAB5C'	17	3	4	1	215	23.7	8.41	900000	162455	0.180505
'Q91349'	'Rep: Nuclear pore complex glycoprotein p62 - Xenopus laevis (African clawed frog), partial (49%)'	'err'	13	2	3	2	290	32.2	5.27	900000	162455	0.180505
'CL29Contig14'	'ATP-dependent RNA helicase DDX3X '	'DDX3X'	7	4	8	2	697	77.1	6.9	900000	162455	0.180505
'CL303Contig2'	'Filamin-A '	'FLNA'	12	7	13	2	672	70.7	5.78	900000	162455	0.180505
'Q4V7J3'	'Rep: LOC494706 protein - Xenopus laevis (African clawed frog), partial (73%)'	'err'	26	4	14	1	202	22.5	6.02	900000	162455	0.180505
'Q7ZWY6'	'Rep: Rpl9-prov protein - Xenopus laevis (African clawed frog), complete'	'err'	27	4	5	1	230	26.2	10.2	900000	162455	0.180505
'Q8AVN6'	'Rep: MGC52646 protein - Xenopus laevis (African clawed frog), partial (47%)'	'err'	13	5	11	1	291	33.6	4.75	900000	162455	0.180505
'zeinaSSns_comp387464_c3_seq1'	'Eukaryotic translation initiation factor 3 subunit G '	'EIF3G'	16	4	11	1	330	36.7	6.3	900000	162455	0.180505
'CL5171Contig1'	'Sodium/potassium-transporting ATPase subunit alpha-3 '	'ATP1A3'	7	6	9	1	1025	112.9	5.45	900000	162455	0.180505
'CL5313Contig1'	'60S ribosomal protein L9 '	'RPL9'	32	4	6	1	193	22	10.11	900000	162455	0.180505
'P70094'	'Rep: Histone H2A.Z-like - Xenopus laevis (African clawed frog), complete'	'err'	23	5	9	1	186	20.3	10.37	900000	162455	0.180505
'CL7242Contig2'	'Tubulin alpha-8 chain (Fragment) '	'TUBA8'	16	5	15	1	456	51	5.43	900000	162455	0.180505
'CL640Contig7'	'Aconitate hydratase, mitochondrial '	'ACO2'	13	9	18	1	783	85.4	7.21	900000	162455	0.180505
'CL1206Contig1'	'Probable ATP-dependent RNA helicase DDX6 '	'DDX6'	16	5	20	1	481	54.1	8.7	900000	162455	0.180505
'CL3864Contig1'	'Polyadenylate-binding protein 1 '	'PABPC1'	13	8	22	2	629	70.5	9.31	900000	162455	0.180505
'CL1948Contig3'	'T-complex protein 1 subunit epsilon '	'CCT5'	15	9	30	2	571	62.8	6.49	900000	162455	0.180505
'CL1360Contig1'	'SWI/SNF-related matrix-associated actin-dependent regulator of chromatin subfamily A member 5 '	'SMARCA5'	29	9	22	1	293	33.9	8.47	900000	162455	0.180505
'CL18845Contig1'	'Tubulin alpha-4A chain '	'TUBA4A'	23	10	33	0	448	49.9	5.06	900000	162455	0.180505
'CL329Contig3'	'Eukaryotic translation initiation factor 4 gamma 1 '	'EIF4G1'	14	11	24	2	896	102.3	7.56	900000	162455	0.180505
'CL4688Contig2'	'Cytochrome b-c1 complex subunit 2, mitochondrial '	'UQCRC2'	21	8	19	2	450	47.8	8.92	900000	162455	0.180505
'CL1Contig193'	'Tubulin alpha-3C/D chain '	'TUBA3C'	24	10	26	1	450	50.1	5.06	900000	162455	0.180505
'CL2093Contig5'	'Dolichyl-diphosphooligosaccharide--protein glycosyltransferase subunit 2 '	'RPN2'	19	9	18	1	631	69	5.24	900000	162455	0.180505
'CL2093Contig3'	'Dolichyl-diphosphooligosaccharide--protein glycosyltransferase subunit 2 '	'RPN2'	17	8	21	2	631	69.2	5.2	900000	162455	0.180505
'CL698Contig1'	'YTH domain family protein 1 '	'YTHDF1'	17	9	28	1	565	61.5	8.78	900000	162455	0.180505
'CL437Contig3'	'Protein disulfide-isomerase '	'P4HB'	26	13	24	6	505	56.6	4.82	900000	162455	0.180505
'dsrrswapns_comp207429_c1_seq2'	'Hsc70-interacting protein '	'ST13'	35	7	34	0	256	29.3	5.53	900000	162455	0.180505
'CL430Contig1'	'Elongation factor 1-alpha 1 '	'EEF1A1'	26	9	32	2	462	50.2	9.22	900000	162455	0.180505
'Q6NWX0'	'Rep: ATP synthase subunit beta - Xenopus tropicalis (Western clawed frog) (Silurana tropicalis), partial (32%)'	'err'	56	4	21	2	142	16	5.07	900000	162455	0.180505
'CL3082Contig1'	'T-complex protein 1 subunit alpha '	'TCP1'	32	16	46	1	555	60.1	6.21	900000	162455	0.180505
'CL1065Contig7'	'Lamin A/C '	'LMNA'	25	16	18	1	645	74.5	5.8	900000	162455	0.180505
'CL57Contig20'	'Tubulin beta chain '	'TUBB'	35	13	34	2	445	49.9	4.97	900000	162455	0.180505
'CL2103Contig5'	'Tyrosine-protein kinase BAZ1B '	'BAZ1B'	16	22	37	1	1443	166.1	7.21	900000	162455	0.180505
'CL70Contig14'	'DNA topoisomerase 2-beta '	'TOP2B'	9	15	58	1	1700	191.6	7.49	900000	162455	0.180505
'CL2028Contig3'	'78 kDa glucose-regulated protein '	'HSPA5'	46	29	104	2	655	72.4	5.08	900000	162455	0.180505
'CL15Contig18'	'Death domain-associated protein 6 '	'DAXX'	4	3	3	3	916	102.3	5.19	900000	162455	0.180505
'Q8AVV9'	'Rep: Pcbp2b protein - Xenopus laevis (African clawed frog), partial (92%)'	'err'	13	3	4	3	319	33.8	8.9	900000	162455	0.180505
'CL772Contig5'	'Kinesin-like protein KIF22 '	'KIF22'	4	2	3	2	693	77.9	9.61	900000	162455	0.180505
'CL7291Contig1'	'Checkpoint protein HUS1 '	'HUS1'	5	1	2	1	282	32	7.96	900000	162455	0.180505
'CL2454Contig2'	'Cullin-4B '	'CUL4B'	4	4	5	1	866	99.9	8.32	900000	162455	0.180505
'CL3925Contig2'	'Cullin-associated NEDD8-dissociated protein 1 '	'CAND1'	1	2	2	2	1230	136.3	5.83	900000	285307	0.317008
'zeinaSSns_comp388892_c0_seq7'	'ATP-dependent RNA helicase DDX3X '	'DDX3X'	8	5	7	3	676	76.1	7.91	900000	162455	0.180505
'CL11199Contig1'	'Non-structural maintenance of chromosomes element 1 homolog '	'NSMCE1'	11	3	5	2	270	30.9	7.33	900000	957959	1.0644
'CL6Contig46'	'Serine/threonine-protein phosphatase 2A 56 kDa regulatory subunit gamma isoform '	'PPP2R5C'	5	3	6	3	577	67	7.81	900000	415938	0.462153
'dsrrswapns_comp198197_c0_seq2'	'Structural maintenance of chromosomes protein 5 '	'SMC5'	4	4	5	4	1109	130.2	8.66	900000	696187	0.773542
'CL2666Contig2'	'Calcineurin-binding protein cabin-1 '	'CABIN1'	6	10	11	10	2142	241.6	6	900000	2.07997e+06	2.31107
'CL2740Contig1'	'X-ray repair cross-complementing protein 6 '	'XRCC6'	6	3	3	3	611	69.3	6.35	900000	1.99348e+06	2.21498
'CL36Contig1'	'RNA-binding protein 25 '	'RBM25'	7	6	10	5	814	95.9	5.85	900000	1.33162e+06	1.47958
'dsrrswapns_comp215556_c1_seq2'	'Pre-mRNA-processing factor 40 homolog A '	'PRPF40A'	1	1	1	1	923	106.3	7.74	900000	1.61637e+06	1.79597
'CL4314Contig1'	'DNA polymerase epsilon subunit 3 '	'POLE3'	12	2	2	2	147	16.8	4.69	900000	1.16863e+06	1.29848
'CL1Contig1347'	'Ubinuclein-2 '	'UBN2'	9	4	4	2	465	47.7	11.37	900000	770972	0.856636
'CL6725Contig1'	'Interferon-inducible double stranded RNA-dependent protein kinase activator A '	'PRKRA'	12	3	5	3	309	34	8.25	900000	810623	0.900693
'zeinaSSns_comp370146_c0_seq2'	'High mobility group protein B2 '	'HMGB2'	21	4	4	1	212	24.2	6.44	900000	1.15409e+06	1.28232

## Sheet: Most_increased
Description	Gene ID	ΔH1/ΔIgG
Structural maintenance of chromosomes protein 4	SMC4	1.83101
Structural maintenance of chromosomes protein 2	SMC2	1.87116
DNA topoisomerase 2-alpha	TOP2A	3.13239
Condensin complex subunit 3	NCAPG	2.54087
Condensin complex subunit 1	NCAPD2	3.64621
SWI/SNF-related matrix-associated actin-dependent regulator of chromatin subfamily A member 5	SMARCA5	2.75076
Condensin complex subunit 2	NCAPH	2.21551
DNA replication licensing factor MCM7	MCM7	2.17411
DNA replication licensing factor MCM5	MCM5	2.64095
FACT complex subunit SPT16	SUPT16H	1.8033
FACT complex subunit SSRP1	SSRP1	1.73675
Shugoshin-like 1	SGOL1	1.78914
Mediator of DNA damage checkpoint protein 1	MDC1	2.50191
Fanconi anemia group I protein	FANCI	2.51927
Histone H1.3	HIST1H1D	2.20168

## Sheet: Most_Decreased
Description	Gene ID	ΔH1/ΔIgG
DNA damage-binding protein 1	DDB1	0.194282
Histone H1oo	H1FOO	0.154352
Bromodomain and WD repeat-containing protein 3	BRWD3	0.353012
GTP-binding nuclear protein Ran	RAN	0.499217
Lymphoid-specific helicase	HELLS	0.377682
DNA topoisomerase 2-binding protein 1	TOPBP1	0.485416
Telomere-associated protein RIF1	RIF1	0.00641809
Exportin-2	CSE1L	0.217926
Probable ATP-dependent RNA helicase DDX6	DDX6	0.349924
Polyadenylate-binding protein 1	PABPC1	0.254414
Prohibitin	PHB	0.336468
Importin subunit beta-1	KPNB1	0.0996551
RuvB-like 1	RUVBL1	0.0193155
Importin alpha 5.1	Imp 5.1	0.253842
Nuclear pore complex protein Nup98-Nup96	NUP98	0.23682
