# Supplementary material for: Linker histone H1.8 inhibits chromatin binding of condensins and DNA topoisomerase II to tune chromosome length and individualization
Source: eLife. 2021 Aug 18;10:e68918. doi: 10.7554/eLife.68918 (PMC8416026; doi:10.7554/eLife.68918)
Supplement: Figure 5—source data 1. [file elife-68918-fig5-data1.xlsx]

## Sheet: Fig 5C
						-Noc	+Noc
						11.3442	4.96947
						17.4959	9.97069
						11.672	8.96297
						18.2413	6.30924
						15.9656	4.93945
						11.1872	9.60502
						15.7955	5.87762
						24.5798	9.79378
						25.0483	7.1214
						24.8624	9.7226
						19.6804	7.5709
						22.1479	6.42112
						16.7578
						27.662
						23.5527
						42.0471
						15.3709
						16.9025
						30.1278
						19.5228
						20.5597
						34.7166
						23.1925
						20.1401
						18.9874
						24.1615
						34.4049
						35.8246
						19.5508
						12.0348
						15.8444
						29.7681
						36.9072
						27.419
						32.3996
						16.4831
						26.9993
						39.5523
						25.5384
						15.3836
						32.7524
						14.7921
						22.5573
						31.5068
						17.3146
						27.5845
						20.4508
						22.7246
						34.6228
						28.2515
						26.3405
						16.6763
						23.7132
						32.8743
						10.9015
						17.978
						11.5928
						17.4208
						14.3296
						26.0062
						20.2801
						20.9811
						19.4422
						16.0282
						26.9415
						12.7222
						14.0269
						11.9421
						22.1437
						11.7354
						17.0033
						15.599
						21.8601
						27.8228
						13.1296
						16.5647
						14.7284
						16.8082
						13.6412
						16.8775
						17.4698
						26.3224
						16.806
						16.7273
						17.864
						15.4691
						15.6802
						24.0704
						14.3585
						24.7545
						29.9637
						20.6208
						21.7282
						23.2142
						18.9497
						17.6417
						17.0223
						22.4208
						12.6967
						19.3725
						20.5162
						23.8823

## Sheet: Fig 5E
				% of chromosomes in clusters <4 CENP-A foci
				+DMSO	+ICRF	+Noc+DMSO	+Noc+ICRF
			Experiment 1	77.4	53.7	87.5	9.5
			Experiment 2	57.4	33.8	86	3.3

## Sheet: fig sup 1A
					-Noc	+Noc
					427.257	343.961
					256.98	312.958
					413.029	379.294
					588.451	281.867
					175.703	304.566
					750.733	273.147
					766.522	282.159
					890.249	311.04
					1203.62	310.819
					833.024	216.483
					382.308	296.944
					497.326	361.704
					1079.08	251.001
					1546.32
					591.467
					623.689
					944.757
					880.748
					635.752
					1114.85
					200.847
					302.667
					218.81
					337.464
					269.095
					388.631
					828.292
					770.321
					920.657
					1212.82
					740.776
					1187.62
					168.457
					202.586
					170.232
					171.907
					226.515
					234.604
					302.239
					362.031
					229.763
					191.605
					702.23
					1318.57
					1125.11
					967.479
					978.54
					638.871
					1022.72
					495.717
					1382.98
					1381.8
					732.872
					995.137
					1177.33
					835.142
					417.844
					996.181
					1253
					1073.81
					559.183
					576.793
					670.406
					792.884
					516.898
					1008.17
					622.241
					580.925
					1044.2
					1120.83
					1216.03
					1096.04
					1548.72
					1081.74
					895.108
					699.105
					2251.39
					1024.39
					973.29
					867.627
					1164.21

## Sheet: fig sup 1D
					DMSO	ICRF-50 min	ICRF-2 min
					2587	247	395
					2829	509	341
					602	656	371
					2132	541	304
					229	350	859
					3785	713	1195
					1403	206	997
					223	1963	840
					219	233	656
					419	478	675
					955	206	340
					2237	386	489
					2166	246	613
					233	475	534
					2282	574	526
					2829	1027	781
					203	1375	364
					2276	589	383
					2873	301	382
					2508	262	1234
					280	218	924
					519	626	320
					537	262	1317
					702	1564	453
					495	716	476
					1478	271	1563
					4552	691	238
					204	844	980
					1203	466	798
					4132	2362	1038
					2407	741	1113
					256	731	294
					2647	248	731
					287	328	1053
					2754	355	255
					2118	241	237
					2724	213	612
					391	271	218
					1479	324	2238
					2499	208	1889
					2734	205	450
					1102	267	1238
					2384	212	490
					326	882	317
					2270	1551	1096
					231	274	571
					507	248	438
					256	230	378
					547	200	1084
					683	277	588
					2218	259	286
					1949	516	279
					2142	1315	532
					203	267	388
					2207	606	337
					2246	634	357
					2798	451	304
					1965	212	851
					253	281	974
					1190	308	827
					450	379	639
					2456	231	666
					2008	220	330
					2085	287	423
					2280	557	599
					953	551	538
					2106	322	531
					217	325	784
					2824	200	355
					3279	240	382
					2323	542	378
					1964	219	1230
					1223	220	924
					2032	475	296
					243	203	1291
					3128	274	444
					1251	1288	475
					2466	248	1576
					670	565	971
					2216	1365	792
					502	274	1004
					2335	320	1092
					2492	271	286
					2501	282	728
					3515	412	1047
					347	425	436
					3023	304	254
					293	434	234
					3465	308	594
					2420	271	201
					2638	347	2208
					543	231	1899
					214	304	412
					1831	290	1219
					2549	343	468
					9212	294	307
					2241	279	1080
					2387	1452	540
					2037	460	412
					281	376	372
					2596	202	1070
					3554	286	586
					2988	266	279
					239	354	263
					2014	226	527
					261	260	511
					1405	367	263
					1774	293	274
					2481	1831	1209
					1970	415	242
					3066	1083	493
					2766	348	1339
					205	857	425
					475	625	436
					3473	293	367
					1862	284	759
					369	324	392
					2921	422	601
						508	1332
						394	277
						435	1416
						253	827
						289	296
						273	429
						325	3569
						219	240
						489	1148
						747	350
						260	639
						3073	303
						264	1022
						200	258
						290	281
						773	313
						213	326
						444	316
						206	512
						245	518
						248	314
						312	1936
						269	693
						1616	968
						516	520
						355	308
						262	1348
						242	721
						293	390
						225	1672
						281	239
						305	380
						253	565
						341	329
						341	328
						221	595
						557	284
						432	312
						206	251
						215	369
						256	312
						642	1277
						376	394
						374	568
						295	1211
						462	671
						253	415
						335	494
						237	2942
						295	2127
						811	298
						298	573
						264	270
						342	484
						393	2500
						276	207
						1658	627
						241	335
						617	767
						348	745
						222	1156
						716	307
						1696	365
						501	200
						236	333
						277	239
						206	217
						737	541
						344	316
						283	479
						347	555
						218	1899
						2176	486
						296	643
						781	715
						245	3117
						411	274
						296	236
						975	263
						346	815
						643	606
						720	380
						336	898
						235	402
						287	1285
						488	1500
						778	378
						289	827
						228	329
						327	1131
						293	838
						310	617
						503	358
						362	3117
						1375	697
						447	735
						260	2545
						619	905
						334	316
						457	1394
						843	1421
						694	596
						275	2623
						358	416
						257	202
						403	12210
						845	1356
						253	361
						431	1013
						228	608
						640	446
						617	2577
						448	249
						344	4869
						302	490
						378	378
						535	2358
						214	1549
						253	486
						349	358
						303	455
						317	294
						294	313
						220	495
						1016	1244
						804	376
						1351	462
						1230	306
						294	3475
						537	692
						345	541
						244	433
						711	792
						309	241
						464	1154
						346	1485
						370	1521
						657	510
						295	3388
						217	1833
						295	208
						246	932
						429	507
						396	442
						229	914
						602	874
						743	434
						302	1002
						473	961
						344	2402
						1005	261
						307	467
						243	660
						326	322
						210	245
						731	790
						293	378
						1628	1274
						449	1190
						365	1212
						290	1105
						493	210
						371	1507
						331	493
						610	526
						291	937
						1739	1398
						209	959
						286	380
						339	1000
						268	248
						336	1158
						548	962
						312	370
						358	417
						356	287
						1525	646
						2236	1259
						308	943
						217	1552
						660	3184
						603	904
						327	971
						2009	437
						408	1451
						763	230
						300	527
						422	778
						337	266
						580	422
						335	2954
						498	502
						400	399
						316	365
						323	566
						422	1194
						420	651
						331	1134
						339	338
						360	2658
						200	752
						387	669
						283	327
						327	310
						1647	579
						634	573
						1880	348
						280	773
						1765	686
						299	1903
						301	231
						239	357
						278	426
						628	226
						771	217
						297	212
						1205	590
						358	257
						269	230
						253	2705
						794	902
						2082	641
						405	269
						310	274
						724	531
						769	540
						216	264
						471	705
						325	660
						502	1816
						1011	215
						474	308
						328	340
						323	219
						344	214
						392	246
						360	453
						569	853
						695	233
						292	807
						258	858
						288	395
						331	656
						408	1094
						621	282
						688	338
						376	587
						498	1006
						1727	726
						224	265
						328	652
						334	681
						370	311
						1161	1566
						252	307
						397	294
						2014	367
						414	1461
						429	601
						682	514
						1153	768
						337	460
						516	220
						626	304
						387	304
						995	1289
						954	273
						520	550
						481	1396
						405	452
						521	461
						903	212
						1285	203
						416	825
						529	436
						205	667
						1191	481
						534	1417
						456	314
						599	1476
						324	870
						976	331
						588	458
						360	3807
						449	244
						2823	1293
						319	387
						476	646
						532	328
						333	1110
						393	306
						211	314
						282	343
						421	369
						210	357
						355	589
						2038	571
						634	333
						1194	2117
						807	769
						328	551
						355	1493
						432	867
						599	784
						515	442
						447	1693
						824	282
						3276	405
						1331	647
						1461	310
						208	279
						329	856
						256	786
						329	396
						319	275
						312	419
						817	413
						340	1759
						576	615
						888	337
						582	1740
						257	751
						379	2969
						291	343
						1455	1604
						324	364
						397	656
						319	686
						216	348
						458	1255
						499	236
						522	1353
						917	328
						746	254
						814	358
						460	1077
						308	591
						810	332
						222	350
						661	277
						796	1652
						339	783
						394	1068
						304	477
						467	427
						525	441
						269	285
						392	1432
						851	219
						299	203
						237	478
						1609	1116
						432	369
						1196	378
						549	724
						890	305
						716	1364
						1117	471
						315	220
						226	2951
						874	1567
						253	684
						415	213
						254	1177
						1080	361
						273	246
						237	311
						246	217
						307	237
						262	280
						292	573
						398	364
						984	559
						308	367
						325	575
						578	368
						1862	481
						401	399
						200	421
						635	389
						271	479
						1300	330
						242	1918
						285	211
						249	456
						316	449
						218	226
						200	275
						298	534
						280	200
						979	689
						643	650
						1179	575
						746	798
						349	1020
						486	418
						1601	1576
						268	827
						240	240
						323	398
						260	606
						405	462
						983	218
						596	1098
						358	602
						256	766
						1382	286
						226	846
						1295	210
						649	561
						688	635
						309	348
						345	971
						282	787
						269	450
						679	263
						781	555
						377	532
						225	533
						287	341
						296	842
						241
						226
						230
						348
						307
						276
						715
						1175
						208
						268
						459
						2081
						201
						1286
						284
						422
						218
						392
						708
						677
						335
						269
						277
						257
						233
						295
						320
						417
						262
						436
						490
						516
						308
						219
						650
						373
						1080
						282
						258
						257
						220
						311
						467
						1012
						1754
						2246
						333
						237
						207
						279
						911
						348
						310
						237
						283
						602
						760
						254
						349
						246
						242
						259
						462
						325
						215
						819
						334
						219
						558
						354
						386
						355
						631
						352
						280
						244
						201
						1172
						223
						214
						381
						293
						470
						334
						447
						667
						443
						416
						1040
						268
						231
						220
						825
						256
						358
						389
						439
						207
						255
						250
						228
						496
						269
						330

## Sheet: fig sup 1E
						% of chromosomes in clusters of indicated CENP-A foci
						No. of CENP-A foci	1_DMSO	1_ICRF	1_Noc_DMSO	1_Noc_ICRF
						0	21.8	4.9	6.2	1.7
						1	28.5	17.2	52.1	0.2
						2	18.2	15.7	20.8	3
						3	8.8	15.9	8.4	4.5
						4	4.7	15.3	6.1	5
						5	7.4	8.5	3.6	8.7
						6	3.5	6.4	1.7	10.4
						7	4.1	3	0.5	3.5
						8	2.4	3.4	0.6	6
						9	0	5.7	0	6.7
						10	0	0	0	10
						11	0	0	0	2.7
						12	0	0	0	26.9
						13	0	0	0	3.2
						14	0	0	0	3.5
						15	0	0	0	0
						16	0	3.4	0	4
						17	0	0	0	0
						18+	0.6	0.6	0	0
