# Supplementary material for: Linker histone H1.8 inhibits chromatin binding of condensins and DNA topoisomerase II to tune chromosome length and individualization
Source: eLife. 2021 Aug 18;10:e68918. doi: 10.7554/eLife.68918 (PMC8416026; doi:10.7554/eLife.68918)
Supplement: Figure 7—source data 1. [file elife-68918-fig7-data1.zip]

Archive with 6 entries (6 files):
- Fig 7/Figure 7_blots.pdf
- Fig 7/Figure 7-figure supplement 1A_H18.tif
- Fig 7/Figure 7-figure supplement 1A_H3T3ph.tif
- Fig 7/Figure 7-figure supplement 1A_TOP2A.tif
- Fig 7/Figure 7-figure supplement 1A_tubulin.tif
- Fig 7/Figure 7-plot data 1.xlsx
