# Supplementary material for: Linker histone H1.8 inhibits chromatin binding of condensins and DNA topoisomerase II to tune chromosome length and individualization
Source: eLife journal article supplement (doi:10.7554/elife.68918), 2021-08-18
Supplement: supp [file Figure 1-plot data.xlsx]

## Sheet: Fig 1D
				Condensin I/DNA													Topo II/DNA
				Experiment 1				Experiment 2				Experiment 3					Experiment 1				Experiment 2				Experiment 3
				ΔIgG	ΔH1	ΔH1+rH1.8		ΔIgG	ΔH1	ΔH1+rH1.8		ΔIgG	ΔH1	ΔH1+rH1.8			ΔIgG	ΔH1	ΔH1+rH1.8		ΔIgG	ΔH1	ΔH1+rH1.8		ΔIgG	ΔH1	ΔH1+rH1.8
				1.55127	2.79107	1.07863		0.951776	2.30561	1.1025		1.03532	1.74289	0.393762			1.81903	4.96429	1.02066		0.863066	4.05842	1.11575		1.84674	2.31797	1.38788
				1.01382	2.29122	1.23703		1.00299	2.38156	0.63734		1.09397	1.9304	0.367696			1.20051	3.88017	1.25664		0.913349	3.6203	1.21343		0.965779	2.35478	0.94739
				1.03468	1.68366	1.25448		0.99031	2.32497	1.03924		0.487181	1.20249	0.36327			1.04511	2.48453	1.22475		0.761899	4.13019	1.18988		0.737288	1.56585	1.01272
				1.05409	1.8094	1.32879		0.99668	2.38564	1.03372		1.99602	1.22516	0.316629			1.06031	2.90359	1.31219		1.08746	2.06683	1.03276		0.766682	2.28137	1.04167
				1.27398	2.71428	1.18382		0.850051	2.09651	1.94556		4.06171	2.09618	0.288828			1.28021	4.38932	1.2836		0.731833	3.98501	1.00823		0.893572	2.67407	0.896422
				1.01932	2.00022	1.2738		0.972223	1.44593	1.89359		1.68022	0.784706	0.418639			1.00906	3.34916	1.30359		1.75971	6.34856	1.07875		0.737753	0.833567	0.888406
				0.974693	2.02116	1.35294		1.06722	2.40145	0.964527		0.489273	2.9222	1.217			0.991014	3.39683	1.44959		0.786171	0.725975	0.60988		0.779161	2.554	1.09652
				0.902747	2.37221	1.32801		1.02341	2.54925	0.795443		6.0924	0.732689	0.880041			0.852311	4.2005	1.28369		0.835825		0.912536		1.77398	2.40255	0.666647
				1.22263	2.28614	1.11269		1.49292	2.33068	0.945895		1.25593	1.15251	0.676883			1.49981	2.74172	1.07292		0.979572		0.816431		1.56082	0.777729	0.975583
				0.868683	2.12664	1.27361		1.06599	2.33957	1.70668		2.39175	1.0554	0.421786			0.753034	3.34236	1.39246		1.06821		0.84733		0.432781	1.64101	1.77954
				0.988665	2.02329				2.24596	0.804814		0.822308	1.38274	0.351795			0.973161	3.48835			2.08053		0.91875		0.60944	1.27787	1.38926
				1.06079	1.35577							1.22554	1.68769	0.428705			1.11513	1.6867			0.853919		0.595394		0.722634	1.60657	0.426692
				0.806905	2.36648							0.91643	1.31353	0.730002			0.71566	3.72668					1.97912		1.24155	1.74669	0.974114
				0.829001	2.16688							0.324691	1.78127	0.410414			0.760209	3.61214					0.995514		0.765199	1.8074	1.13264
				0.735985								0.589963	1.61496	0.372394			0.766625								1.5638	1.78846	0.911194
				0.912342								0.728853	1.80553	0.431981			0.836635								1.00288	3.29004	1.17613
												0.249251	4.88491	0.406688											0.871629	1.64083	1.25646
												1.08209	2.34518	0.430571											2.25006	3.14364	0.664446
												0.899811	1.33289	1.0325											0.833139	1.61189	0.453392
												0.382948	2.18767	0.455769											1	2.72722	0.578926
												0.809114	2.11764	0.277111											0.936451	2.08915	1.39823
												0.375694	1.27769	0.414934											2.23955	1.2274	1.29437
												0.506221	2.53305	0.33097											1.02459	2.58105	1.6151
												0.77562	2.2123	0.196235											0.788961	0.952095	1.15402
												1.08674	1.95074	0.913964											1.56822	3.34422	0.959043
												0.978564	0.766917	0.864494											1.03098	2.44069	0.446428
												1.36407	1.74897	0.681649											1.12398	1.54101	1.18581
												0.999992	4.40029	0.523551											1.68817	1.67723	0.944946
												3.39794	2.27481	0.259935											1.27746	1.43397	1.2478
												1.22622	1.63278	0.518946											1.66149	3.28243	1.27937
												1.13424		0.425765											0.778053	1.76295	1.00594
																											0.753042

## Sheet: Fig 1E
				TOP2A/H3				CAP-G/H2B
				ΔIgG	ΔH1			ΔIgG	ΔH1
				1	2.0173			1	1.6
				1	1.6			1	3.195
								1	3.3

## Sheet: Fig 1G
				CAP-G2/DNA
				Experiment 1				Experiment 2
				ΔIgG	ΔH1			ΔIgG	ΔH1
				0.766817	1.81679			1.17087	2.59414
				2.18032	2.31906			0.898756	5.82302
				2.52779	8.19148			1.00232	5.48466
				1.65275	0.948944			0.773965	4.73964
				1.74674	4.33502			0.907401	1.23655
				2.09738	3.6311			0.937685	1.34725
				1.93549	8.51165			1.10314	1.42144
				0.821382	4.4356			1.08967	0.657653
				1.10891	1.69988			1.89518	5.21182
				0.797048	2.79367			0.997446	6.36629
				0.665191	7.82533			0.845194	1.62015
				0.726996	2.59352			1.79682	8.82456
				0.869824	8.43649			0.944869	1.64306
				1.4773	6.64913			0.443971	3.80679
				1.02375	6.21636			0.866798	1.26594
				0.216751	6.7632			1.82271	4.91806
				0.999749	7.23426			1.14164	3.00689
				1.99538	6.22808			0.851029	7.44716
				1.82282	3.44354			1.07453	1.70188
				0.136768	1.06638			1.56339	1.38
				1.9315	4.87925				1.82718
				1.2728	4.72005
				0.519141	1.37955
				1.95191	1.20384
				0.511734	2.7059
				1.97297	1.78255
				1.07448	3.32439
				0.88869	7.22547
				1.16802	4.08831
				0.801037	5.92229

## Sheet: sup data 1B
			Cy3-dUTP/DNA
			CAP-G		TOP2A
			ΔIgG	ΔH1	ΔIgG	ΔH1
			1.25114	0.863821	0.922955	0.99008
			1.11084	0.212747	0.9898	1.05983
			1.06631	0.808881	0.901843	0.97033
			1.007	0.964319	1.077	1.05523
			1.23231	0.713455	0.82201	0.939228
			0.943916	0.689513	0.767687	1.12931
			0.796064	0.706718	0.960798	1.0721
			0.948061	0.745404	0.857889	1.21236
			0.836231	0.583491	1.00039	1.12751
			0.756342	0.536789	0.971842	0.846819
			0.927918	0.821211	0.507248	1.03095
			0.89793	0.757995	0.77421	0.949733
			0.923453	1.11915	0.891487	0.690032
			0.810004	0.78219	0.863844	1.15895
			1.13349	0.894547	1.25791	0.855632
			0.850437	1.1779	1.01525	0.579567
			1.03392	1.57451	0.996653	1.03597
			1.29178	0.594985	1.19368	1.22672
			0.995688	0.323217	1.21113	0.967177
			0.688281	1.00622	1.18439	1.44313
			0.802897	0.717894	1.16963	0.989256
			1.07394	0.982787	1.31068	1.09122
			1.21451	0.92001	1.17362	1.09929
			1.10708	0.879249	1.25976	0.930886
			0.809038	0.862507	1.05978	0.991014
				0.504132		1.20151

## Sheet: sup data 1C
				CAP-G/DNA			CAP-G/Cy3-dUTP			TOP2A/DNA			TOP2A/Cy3-dUTP
				ΔIgG	ΔH1		ΔIgG	ΔH1		ΔIgG	ΔH1		ΔIgG	ΔH1
				0.999344	2.51271		0.798745	2.90883		0.962067	1.27503		1.04238	1.28781
				0.902775	3.06298		0.812695	14.3973		1.0247	1.71998		1.03526	1.62289
				0.911017	1.59802		0.854366	1.9756		0.902	1.65141		1.00017	1.70191
				1.30717	2.33551		1.29809	2.42192		2.48126	1.62973		2.30386	1.54442
				1.04261	0.397122		0.846064	0.556618		1.25585	1.34981		1.52777	1.43715
				1.30753	2.5478		1.38521	3.69508		0.890678	2.86671		1.16021	2.53845
				3.09429	2.19682		3.88698	3.10848		0.871702	1.50142		0.907269	1.40045
				1.02584	1.88765		1.08204	2.53238		1.04918	3.63904		1.22298	3.00162
				0.964286	1.3065		1.15313	2.23911		1.85887	2.58006		1.85815	2.28829
				1.56513	1.07661		2.06934	2.00565		0.873624	1.57546		0.898937	1.86044
				1.3549	0.096837		1.46015	0.117919		0.401171	2.15133		0.790878	2.08674
				0.885152	1.834		0.98577	2.41954		0.641656	1.75507		0.828788	1.84797
				1.61994	3.73784		1.75422	3.3399		0.836057	1.26492		0.937823	1.83314
				2.35273	2.04593		2.90459	2.61565		0.829215	1.8666		0.959913	1.61059
				1.54875	0.802354		1.36637	0.89694		1.5235	1.49524		1.21113	1.74753
				0.791512	2.75615		0.930713	2.33988		0.743959	4.79556		0.732785	8.27438
				0.878018	0.678014		0.84921	0.430621		0.945659	2.40954		0.948835	2.32589
				1.02368	4.69863		0.792458	7.89706		0.965259	4.90014		0.808642	3.99452
				0.989014	0.614449		0.993298	1.90104		1.05069	1.60831		0.867525	1.66289
				0.665259	2.17687		0.966551	2.16342		1.27188	2.98949		1.07387	2.07154
				0.804618	1.43245		1.00214	1.99534		1.18435	1.39257		1.01259	1.40769
				0.994866	1.92126		0.926371	1.95491		1.47388	1.82196		1.12452	1.66966
				0.966148	1.9326		0.795504	2.10062		1.30158	3.03712		1.10902	2.76282
				1.19613	1.94005		1.08044	2.20649		1.00003	2.84682		0.793823	3.05818
				0.908099	1.68028		1.12244	1.94814		1.0348	1.67184		0.976434	1.687
					1.42584			2.82831			2.07007			1.72289
											1.70053			1.56735
