# Supplementary material for: Linker histone H1.8 inhibits chromatin binding of condensins and DNA topoisomerase II to tune chromosome length and individualization
Source: eLife journal article supplement (doi:10.7554/elife.68918), 2021-08-18
Supplement: supp [file Figure 2-plot data 1.xlsx]

## Sheet: Fig 2B
				Condensin I WT							Condensin I Q-loop mutant
				Nucleosomes			Nucleosomes+rH1.8				Nucleosomes			Nucleosomes+rH1.8
			NaCl (mM)	50	100	150	50	100	150		50	100	150	50	100	150
				1.00112	0.261533	0.00174867	0.184555	0.0613308	0.0532039		1.0012	0.740724	0.34425	0.262176	0.173028	0.00290625
				1.00042	0.841611	0.39221	0.239966	0.295454	0.0350988
				0.999819	0.773175	0.334702	0.370352	0.133434	0.0538107

## Sheet: Fig 2C
					Condensin I WT							Condensin I Q-loop mutant
					Nucleosomes			Nucleosomes+rH1.8				Nucleosomes			Nucleosomes+rH1.8
				NaCl (mM)	50	100	150	50	100	150		50	100	150	50	100	150
					0.997135	0.845885	0.666177		0.39595	0.270699		0.998953	0.868332	0.699569	0.602755	0.372378	0.257012
					1.00002	0.790006	0.787139	0.527826	0.318068	0.302846		1	0.803812	0.733742	0.528652	0.257766	0.152899
					1	0.8176	0.786592	0.595598	0.313849	0.219056

## Sheet: Fig 2D
							Nucleosomes			Nucleosomes+rH1.8
						NaCl (mM)	50	100	150	50	100	150
							1	1.03923	1.10773	1.60839	1.10468	0
							1	1.1789	1.00281	1.01509	0.82293	0.122977
							1	0.558467	0.0651002	1.48297	0.395774	0.0977302

## Sheet: fig sup 3D
					Condensin I (mM)	-ATP	+ATP
					0	0	0
					50	0.0771135	0.0673118
					100	0.218406	0.030447
					250	0.611809	0.431137
					500	0.947867	0.747896
					750	0.970631	0.902641

## Sheet: fig sup 4
								Fraction bound
							Condensin I (uM)	Nucleosome			Nucleosome+H1.8
							0	0	0	0	0	0	0
							0.05	0.14	0.17	0.24	0	0	0
							0.1	0.37	0.21	0.52	0.08	0	0
							0.25	0.84	0.82	0.92	0.27	0.26	0.26
							0.5	0.96	0.98	0.97	0.42	0.45	0.61
							0.75	0.98	0.98	0.99	0.61	0.53	0.52
