# Supplementary material for: Linker histone H1.8 inhibits chromatin binding of condensins and DNA topoisomerase II to tune chromosome length and individualization
Source: eLife journal article supplement (doi:10.7554/elife.68918), 2021-08-18
Supplement: supp [file Figure 3-plot data 1.xlsx]

## Sheet: 3D
		Experiment 1					Experiment 2					Experiment 3						Aggregate-medians
		ΔIgG	ΔH1	ΔH1 ΔCAP-G	ΔH1 ΔCAP-D3		ΔIgG	ΔH1	ΔH1 ΔCAP-G	ΔH1 ΔCAP-D3		ΔIgG	ΔH1	ΔH1 ΔCAP-G	ΔH1 ΔCAP-D3			ΔIgG	ΔH1	ΔH1 ΔCAP-G	ΔH1 ΔCAP-D3
	1	15.371	21.645	14.208	21.088		14.6	14.9	7.3	16.6		14.6	19.4	7.7	9.4		Exp 1	14.6695	21.382	8.815	20.307
	2	15.622	20.283	9.747	25.208		13	21.4	6.1	12.6		12.5	17.6	6.8	30.5		Exp 2	9.9	18.2	7.5	17.4
	3	9.424	19.525	7.588	20.707		9.7	19.2	8.2	20.6		10.1	14.7	6.1	24		Exp 3	15.8	19.5	7.6	20
	4	15.118	17.449	7.658	21.31		11.5	16.1	7.2	15.7		18.6	27.2	6	27.1
	5	10.864	18.766	6.217	20.002		11.8	17.7	5.9	15.9		12.2	7	12.3	9.4
	6	15.243	11.934	6.958	28.35		8.4	17.5	6	12.9		8.5	28.1	11.5	20.3
	7	15.257	23.611	16.727	19.845		9.9	19.1	7.5	16.5		18.7	24.8	7.9	20.1
	8	17.114	7.332	5.558	20.395		9.7	22.3	11	16.8		17.2	19.2	6.3	14.2
	9	16.053	14.722	9.426	25.442		10	19.3	7.9	17.7		15.3	25.8	10.5	21.6
	10	17.778	24.495	7.216	27.319		9.4	18.5	5.4	23.2		18.7	16.5	5.9	16.3
	11	20.041	28.834	5.559	22.856		7.5	16.1	10.6	11.7		12.1	21.2	7.9	18.6
	12	13.31	27.678	7.745	9.828		8	11.2	7.2	17		16.1	15.9	5.3	16.7
	13	11.063	21.119	7.107	13.053		16	22.3	8.3	19.8		14.6	16.5	12.7	9.9
	14	14.777	19.397	10.517	12.19		8.7	24	7.4	15.3		24.4	19.9	10	16.6
	15	12.406	17.019	6.047	19.441		12.6	17.7	5.1	17.9		12.9	26.7	6.9	18.8
	16	11.919	20.993	8.905	13.496		11	20.2	8.2	24.3		13.6	17.3	7.6	21.8
	17	12.502	7.037	8.81	19.255		7.6	21.4	8.3	27.6		7.6	20.9	11.4	18
	18	13.014	17.983	13.783	31.058		8.4	13.1	6	13		12.7	19.5	9.7	21.9
	19	8.638	18.47	7.944	20.256		10.1	19.5	6.9	14.4		17.9	14.7	7.9	9.7
	20	13.162	33.244	13.43	24.526		14.9	16.2	9.2	24.3		10.2	16.1	13.4	20.2
	21	9.822	34.936	7.259	26.685		15.1	23.3	13.3	20.7		11.2	15.1	8.2	16
	22	14.519	39.08	9.598	25.127		13.6	16.1	7.6	17.4		18.8	20.3	7.9	30.6
	23	12.277	29.323	7.13	8.889		10.1	18.4	7.7	13.7		15.2	6.6	6	23.8
	24	18.773	17.015	5.617	27.23		8.7	15	6.6	16.2		10.3	25.6	6.8	16.5
	25	17.442	26.223	12.518	16.437		9.2	13.4	7.3	12.5		13.7	16.2	9.7	16.7
	26	15.67	22.241	8.066	26.074		11.9	16.9	7.3	16.1		11.8	18.4	8.6	21.7
	27	15.379	35.252	13.364	22.317		12.1	26.9	7.7	12.4		19.5	25.7	4.5	27.3
	28	10.708	17.36	9.196	13.867		6.5	7.1	5.6	15.6		12.9	18.9	7.4	16.3
	29	16.773	29.48	7.371	15.105		6.8	11.4	7.1	17.6		13.6	13.4	6.6	24.9
	30	13.799	23.546	8.494	31.835		10.8	11.8	9.7	15.1		12.4	25.7	5.4	15.2
	31	13.599	23.574	22.148	17.005		11.3	19.5	8.8	14.7		13	10.4	8.2	17.7
	32	14.885	17.095	7.868	18.988		7.2	16.3	6.6	15		16.1	21.3	8.2	18.2
	33	13.888	19.345	5.258	20.307		13.6	16.1	7.4	16.6		18.5	27.8	6.7	21.6
	34	15.249	9.962	6.543	17.681		13.5	29.7	5	19.2		17.5	14.3	15.2	13.1
	35	16.794	16.594	13.832	19.647		13.5	17.8	8.3	17.4		18.7	42.1	8.4	22.4
	36	22.007	13.314	9.278	23.371		9.1	22.8	6.7	23.6		13.5	26.3	7.2	20.2
	37	15.967	22.659	8.685	22.789		12.8	11.6	17.9	13.1		13	19.4	4.8	16
	38	14.358	16.667	10.782	28.701		8.6	19.7	9.4	21.4		15.5	18.2	7.8	15
	39	16.524	17.297	9.925	18.008		16.2	8.2	5.7	17.4		14.6	18.8	7.9	11.4
	40	14.482	18.414	7.491	19.115		7.7	27	7.7	17.4		15	21.8	10.8	18.6
	41	14.439	28.823	13.421	19.281		12.3	14.7	6.2	16.6		13.4	19	6.2	14.7
	42	16.094	23.443	11.184	28.978		8.9	12.4	8.8	11		17.3	17.6	7.1	17.1
	43	14.648	29.665	9.808	21.656		11.8	10	9	15.6		6.3	30.8	7.2	15.2
	44	11.238	24.769	13.096	12.715		12.7	18.2	4.5	20		17.5	22.6	9.3	20.6
	45	10.118	13.031	7.575	19.067		10.9	21.1	11.1	13.6		17.4	35.9	5.6	19.2
	46	13.131	23.777	7.427	21.541		8	15.3	6.5	17.4		24.6	16.7	7.4	30.8
	47	6.482	22.315	5.72	21.393		13.5	11.1	12.2	25.4		22.6	19.3	12.2	11.7
	48	16.836	30.427	7.965	14.476		9.3	22.5	7.2	17.1		9.3	32	7.6	14.4
	49	11.603	34.358	11.701	14.834		10.7	25.5	7.8	20.3		17.8	19.4	6.5	19.9
	50	12.192	17.418	11.575	13.934		10.7	17	5.4	16.5		10	18.6	7.2	24.8
	51	22.762	10.333	16.906	20.25		9.9	18.5	7.7	23.4		14.3	16.4	7	20.6
	52	14.525	30.13	10.061	26.584		13.6	17.8	9.4	19.5		22.4	19.5	7.1	6.8
	53	14.691	22.838	10.274	23.617		7	11.9	9.5	17.4		13.5	21.4		38.3
	54	17.861	23.741	11.042	19.119		8.6	21.6	7.4	20		17.2	18		15.5
	55	11.692	37.438	8.584	30.215		6.5	17.6	7.8	20.3		21.8	21.2		24.9
	56	15.219	18.887	8.82	28.533		6.7	17.8	7.6	16.7		12.9	24.5		7.6
	57	10.493	22.94	10.09	13.09		14.5	18.3	7	20.3		12.4	27.4		22.2
	58	18.295	24.81	8.274	21.475		10.2	27	4.4	24.3		18.1	18.5		16.4
	59	20.457	18.949	8.156	12.448		10.2	21.2	5.7	19.8		14.8	18.3		32.5
	60	11.498	12.027	11.643	26.727		10.3	12.8	5.5	20.3		16.7	19.6		19.1
	61	10.626		4.983	26.257		9.3	8.4	10.4	10.9		29.2	14.3		17.1
	62	23.377		10.299	19.427		10.8	14.8	7.9	19		28.4	27.2		21.7
	63	18.164			19.155		9.2	19.3	8.9	23		21.5	10.1		26.3
	64	14.994			10.298		11.3	16.8	7.8	13.2		16.4	25.5		26
	65	14.707			15.565		17.9	14.9	8.9	20.9		10.2	32.6		24.3
	66	8.164			23.317		8.2	17.7	6.7	18.5		23.8	25.4		20.2
	67				19.349		10.3	30.1	7.8	17.6		5.7	22.1		18.5
	68				27.291		6.1	23.3	8.1	15.3		13.5	20.1		21.1
	69				21.402		8.4	29.2	13.1	17.6		14.5	24.7		23.6
	70				16.442		10.2	13.3	12.7	19.9		7.3	20.6		18.3
	71				11.67		9.4	15.9	6.9	15.8		24	26.7		27.7
	72				12.132		16.2	16.4	9.1	36.3		19.2	26.8		11.3
	73				23.944		9.3	11.5	6.9	16.2		12.8	25.9		15.4
	74				15.919		8.5	20.7	6.4	22.1		15.8	15.7		29.8
	75				14.972		9.3	19.4	6.5	20.5		13	20		14.9
	76				17.034		12.6	23.3	12.2	17.2		21.4	18.8		21.5
	77				20.292		8.6	15.8	5.4	41.2		15	25.4		17.3
	78				12.028		8.2	22.7	6.9	10.2		21.6	15.8		25.6
	79						9.8	16.1	12.3	18.8		18.6	16.3		18.5
	80						8.8	20.1	6.4	18.8		9.9	18.9		19.2
	81						9	19.3	7.6	13.1		24.5	21.6		27.1
	82						7.1	28.7	5.8	18.3		16.1	26.3		20.8
	83						13.4	22.6	9.3	24.5		20.4	18.8		21.8
	84						10.4	19.4	7.8	20.3		14.9	24.7		21
	85						10	6.7	10.8	16.1		9.3	16.6		21.4
	86						12.4	13.6	7.3	12.3		22.6	21.8		34.5
	87						10.2	14.6	8	13.8		13.8	15.6		14.6
	88						6.7	23.4	6.4	12.6		14.3	17		7.7
	89						8	18.4	6	22.6		18.5	22.5		35.9
	90						7.2	13.9	5.9	17.5		20.3	19.5		20.6
	91						9.3	23.7	7.5	21.1		15.8	19.7		21.2
	92						8.5	18.1	6.6	17.8		14.7	13.4		21
	93						11.6	20.4	6.5	17.2		25.9	25.9		27.8
	94						14.1	20.2	6.5	17		17.7	14.4		19.8
	95						11.8	18.4	6.4	19.6		12.9	30.4		19.7
	96						11.5	20	10.1	24.6		10.7	19.7		31.9
	97						5.8	17.8	5.5	33		18.9	16		19.4
	98						7.8	20.7	11.9	17.3		12.1	15.3		19.9
	99						10.1	15.4	11.4	15.1		18.4	26.2		24.7
	100						11.4	18.2	6	16		17.9	28.4		23.2
	101						8.4	19.8	15.9	16.1		18.9	17.5		25.4
	102						9.4		8.6	17.2		14.1	14.4		33.3
	103						11.2		5.5	18.3		15.8	21.4		19.9
	104						6.6		7.1			22.4	13.1		10.2
	105						9.2		7.9			16.9	27.4		24.8
	106						8.2		7.4			9.4	29.4		18.7
	107						9.2		7.1			17.4	20		22.6
	108						10		7.5			15.3	20		22.3
	109						6.5		9.2			14	19.7		16.8
	110						10.2		9.6			16.1	26.6		12.9
	111						9.6		12.4			19.8	17.5		26
	112						10.3		15.6			21.9	15.6		13.5
	113						8.7					13.6	19.3
	114						9.2					19.8	24.9
	115						7.7					27.1	20.4
	116						8.8					15.3	16.3
	117						8.5					15.8	19.7
	118						10					13.6	18.5
	119						7.1					23.1	13.4
	120						8.6					15.6	19.1
	121						15.9					15.7	17.3
	122						9.1					27.9	25.4
	123						12.7					16.2	13.3
	124						9.5					17.2	25.2
	125						7					16.4	9.6
	126						13.5					23.2	30.5
	127						9.9					12.9	15.9
	128						7.3					17.7	12.4
	129						11.2					15.2	22.1
	130						10.3					11.9	18.5
	131						10.1					4.8	24
	132						10.7					21.3	25.7
	133						9.5					14.4	33.5
	134											13.3	29.1
	135											15.9	22.5
	136											15.6	25.2
	137											14.4	7.8
	138											21.2	6.3
	139											14	24
	140											17.1	22.1
	141											17.3	20.5
	142											6.4	15
	143											15.9	14.1
	144											11.5	34.5
	145											17.8	15.6
	146											12.4	20.2
	147											12.5	21.2
	148											11	21.2
	149											19.4	15.1
	150											15.5	18.6
	151											14.7	27.2
	152											18.1	15.2
	153											15.9	20.7
	154											12.7	25.2
	155											22.6	24.4
	156											14.7	19.7
	157											22.2	18.6
	158											21.5	19.2
	159											13.3	19.6
	160											11.1	19.1
	161											16	11.8
	162											17.2	18.9
	163											16.6	19.3
	164											17.5	16.5
	165											14.4	19.7
	166											19.1	7.8
	167											19.5	16.1
	168											12.4	18.8
	169											14.6	19.3
	170											14	22.1
	171											18.2	22.7
	172											13.6	16.9
	173											17	12.4
	174											10.7	27.3
	175											13	7.8
	176											16.2	16.6
	177											16.8	21.8
	178											17.3	16.1
	179											10.3	17.2
	180											21	11.4
	181											14.5	9.1
	182											19.6	23.9
	183											20.2	21.8
	184											8	17.3
	185											14.9	22.2
	186											17	26.9
	187											20.5	16
	188											17	28.3
	189											16.7	19.6
	190											16.6	17
	191											14.3	21
	192											15.7	17.9
	193											7.6	19.5
	194											21.3	19.6
	195											9.8	25.2
	196											13.7	15.7
	197											18.8	23.8
	198											14.2	16.2
	199											18.3	23.3
	200											18.4	19.4
	201											11.7	24
	202											17.3

## Sheet: 3E
			ΔIgG	ΔIgG, 50% CAP-G	ΔH1	ΔH1, 70% CAP-G	ΔH1. 40% CAP-G	ΔH1ΔCAP-G
		1	0.745599	0.460131	2.46512	1.52304	0.6095	0.155703
		2	0.823054	0.321148	3.52505	1.6611	1.39018	0.153534
		3	0.759302	0.328747	2.07704	1.43925	0.29828	0.163301
		4	0.75444	0.853377	2.69889	1.74384	0.612333	0.154489
		5	1.20416	0.732292	1.82181	1.21016	1.19629	0.143989
		6	1.09361	0.550238	1.45029	1.2447	0.855122	0.14144
		7	0.994959	0.293034	1.62775	2.09874	0.767503	0.173601
		8	1.04622	0.694462	1.87909	1.94643	1.23943	0.193019
		9		0.656455	1.55747	1.07159	0.631952	0.220421
		10		0.287001	2.22322	2.36316	0.829706	0.132544
		11		0.624644	1.94377	1.83478	0.622543	0.249524
		12		0.308306	1.38106	1.2832	0.828409	0.245031
		13		0.914922	1.65541	2.52999	1.08664	0.171209
		14		0.272811	4.96852	1.43521	0.459202	0.167142
		15		0.492227	1.80469	1.03068	0.889716	0.151777
		16		1.36666	1.61808	3.79512	1.29285	0.177409
		17		0.305144	4.4496	1.40071	0.756698	0.189819
		18		0.574756	1.38701	2.12098	1.09638	0.132253
		19		1.16228	1.8197	2.52479	0.429194	0.139728
		20		0.661876	1.28758	1.42967	0.489351	0.174486
		21		0.845651	1.67209	1.68591	0.70956	0.161199
		22		0.218729	1.65585	1.64317	0.880951	0.190066
		23		1.22217	1.81889	2.53859	0.75878	0.193581
		24		0.372005	1.50337	2.05699	0.419606
		25			1.54034	1.11689	0.720251
		26			1.57457	1.0294
		27				1.60616

## Sheet: 3F
				ΔIgG	ΔIgG, 50% CAP-G	ΔH1	ΔH1, 70% CAP-G	ΔH1. 40% CAP-G	ΔH1ΔCAP-G
			1	15.864	8.778	21.614	21.099	8.077	14.388
			2	18.388	6.773	18.746	23.553	12.47	7.094
			3	15.007	15.863	27.96	19.312	12.542	6.942
			4	16.506	8.528	16.904	30.999	12.722	10.762
			5	13.71	8.355	18.77	11.054	13.785	8.448
			6	12.201	10.135	17.309	20.766	10.881	6.483
			7	11.208	13.216	17.48	16.296	9.368	10.306
			8	10.115	11.538	27.253	25.306	6.586	6.377
			9	11.534	5.384	22.594	30.175	16.165	11.474
			10	24.762	8.496	22.625	19.587	16.101	10.879
			11	13.984	8.171	12.909	10.588	12.792	7.994
			12	12.619	9.719	23.981	22.028	14.619	5.236
			13	21.067	5.271	21.014	33.142	18.606	8.329
			14	14.99	8.976	26.879	24.425	13.459	9.397
			15	16.213	9.103	10.86	23.156	10.091	9.089
			16	20.434	4.029	17.433	23.416	10.11	8.354
			17	19.121	9.507	21.648	20.35	9.609	11.649
			18	14.23	17.891	20.393	8.27	13.161	10.162
			19	16.489	8.379	20.691	23.861	12.63	8.566
			20	11.325	10.947	23.328	10.721	5.656	8.922
			21	15.379	13.175	23.935	14.221	7.105	8.811
			22	18.019	11.852	34.887	14.155	12.1	8.967
			23	8.503	9.514	32.651	20.322	18.869	4.117
			24	16.198	12.873	32.543	32.586	6.963	9.538
			25	10.654	7.337	22.726	10.675	13.946	21.18
			26	10.839	9.376	12.952	19.139	13.203	8.131
			27	13.265	7.693	11.755	14.416	10.963	6.953
			28	15.634	10.418	32.812	15.448	9.66	9.311
			29	22.405	10.979	18.668	34.117	13.037	8.851
			30	12.438	10.553	19.007	10.186	16.609	8.194
			31	12.241	12.352	17.377	32.317	16.743	7.092
			32	11.031	6.577	21.641	14.825	14.792	7.731
			33	11.108	11.042	8.685	26.646	7.033	8.41
			34	15.102	11.435	24.348	23.771	12.674	12.434
			35	11.725	8.821	9.536	18.937	21.63	6.85
			36	13.817	11.695	20.133	18.267	11.275	6.185
			37	10.109	9.958	16.691	22.229	5.798	10.548
			38	12.699	10.252	23.492	31.171	4.481	8.229
			39	12.822	12.438	33.635	29.712	15.399	6.829
			40	12.453	5.811	33.421	16.045	17.537	11.21
			41	13.49	12.801	19.244	28.54	6.643	12.703
			42	16.449	12.365	23.177	20.976	13.528	6.446
			43	21.207	15.336	33.191	15.803	13.966	7.788
			44	16.639	11.494	26.986	21.34	14.125	7.715
			45	17.641	12.492	23.495	18.643	17.088	7.586
			46	12.453	14.541	13.457	28.204	16.367	8.555
			47	18.315	17.807	16.543	25.911	14.084	11.608
			48	15.434	20.58	19.856	14.661	14.583	7.697
			49	12.078	12.803	17.165	21.621	18.026	6.439
			50	12.746	21.115	17.073	14.833	20.371	6.627
			51	20.704	10.354	24.614	20.978	13.276	9.704
			52	22.417	14.542	23.148	19.835	14.656	4.242
			53	14.418	17.298	16.802	21.095	9.786	9.633
			54	13.463	12.755	20.794	24.509	13.054	11.429
			55	14.915	13.459	16.012	15.811	7.119	8.33
			56	10.852	7.059	23.276	21.941	5.953	8.095
			57	17.159	13.904	20.504	18.469	16.805	9.881
			58	10.121	9.535	33.342	20.592	24.656	5.933
			59	16.575	9.683	18.561	31.759	14.19	8.213
			60	17.501	11.24	15.122	19.573	11.234	5.199
			61		15.199	15.545	21.442	18.025	14.866
			62		7.099	17.927	22.996	12.599	10.2
			63		10.095	15.62	13.083	24.651	6.795
			64		8.926	26.635	32.46	19.259	6.006
			65		12.111	49.884	18.364	13.258	7.349
			66		10.505	17.199	22.127	9.18	13.914
			67		15.791	20.461	19.32	17.098	13.237
			68		12.24	14.26	6.091	4.796	12.066
			69		9.043	17.095	13.019	17.264	6.838
			70		7.399	24.566		14.534	7.583
			71		9.935	11.08		6.643	10.312
			72		8.769	40.268		12.62	15.72
			73		16.433	9.578		14.561	9.207
			74		5.822	24.58		19.31	6.354
			75		23.393	16.614		12.021	5.449
			76		14.134	29.938		10.927	8.155
			77		11.139	21.051		12.702	7.616
			78		13.349	23.994		11.305	6.516
			79		18.506	17.765		13.424	4.228
			80		14.892	36.588		10.225	7.188
			81		8.095	33.593		14.167	8.042
			82			19.269		21.951	18.4
			83			22.299			8.155
			84			25.25			12.156
			85			24.458			11.79
			86			18.587			11.288
			87			31.225			8.098
			88			19.22			12.592
			89						7.267
			90						13.962
			91						11.313
			92						14.199
			93						4.903
			94						6.529
			95						6.939
			96						7.138
			97						9.159
			98						12.369
			99						5.145
			100						8.628
			101						9.831
			102						4.537
			103						8.519
			104						5.11
			105						16.976
			106						8.04
			107						6.184
			108						8.532
			109						5.665
			110						6.366

## Sheet: fig sup 1A
				ΔIgG	ΔH1	ΔCAP-D3	ΔH1 ΔCAP-G	ΔH1 ΔCAP-D3
			1	15.371	21.645	11.805	14.208	21.088
			2	15.622	20.283	16.636	9.747	25.208
			3	9.424	19.525	9.034	7.588	20.707
			4	15.118	17.449	16.995	7.658	21.31
			5	10.864	18.766	13.366	6.217	20.002
			6	15.243	11.934	11.858	6.958	28.35
			7	15.257	23.611	14.968	16.727	19.845
			8	17.114	7.332	18.939	5.558	20.395
			9	16.053	14.722	21.255	9.426	25.442
			10	17.778	24.495	11.829	7.216	27.319
			11	20.041	28.834	11.833	5.559	22.856
			12	13.31	27.678	9.782	7.745	9.828
			13	11.063	21.119	13.376	7.107	13.053
			14	14.777	19.397	13.833	10.517	12.19
			15	12.406	17.019	14.318	6.047	19.441
			16	11.919	20.993	13.244	8.905	13.496
			17	12.502	7.037	10.094	8.81	19.255
			18	13.014	17.983	15.849	13.783	31.058
			19	8.638	18.47	11.913	7.944	20.256
			20	13.162	33.244	10.96	13.43	24.526
			21	9.822	34.936	12.085	7.259	26.685
			22	14.519	39.08	22.456	9.598	25.127
			23	12.277	29.323	18.264	7.13	8.889
			24	18.773	17.015	19.967	5.617	27.23
			25	17.442	26.223	18.811	12.518	16.437
			26	15.67	22.241	18.549	8.066	26.074
			27	15.379	35.252	13.459	13.364	22.317
			28	10.708	17.36	16.601	9.196	13.867
			29	16.773	29.48	13.485	7.371	15.105
			30	13.799	23.546	23.082	8.494	31.835
			31	13.599	23.574	16.312	22.148	17.005
			32	14.885	17.095	11.681	7.868	18.988
			33	13.888	19.345	14.653	5.258	20.307
			34	15.249	9.962	13.189	6.543	17.681
			35	16.794	16.594	10.597	13.832	19.647
			36	22.007	13.314	11.192	9.278	23.371
			37	15.967	22.659	13.86	8.685	22.789
			38	14.358	16.667	14.798	10.782	28.701
			39	16.524	17.297	12.091	9.925	18.008
			40	14.482	18.414	11.815	7.491	19.115
			41	14.439	28.823	11.857	13.421	19.281
			42	16.094	23.443	25.297	11.184	28.978
			43	14.648	29.665	10.03	9.808	21.656
			44	11.238	24.769	18.684	13.096	12.715
			45	10.118	13.031	15.361	7.575	19.067
			46	13.131	23.777	11.911	7.427	21.541
			47	6.482	22.315	18.342	5.72	21.393
			48	16.836	30.427	18.397	7.965	14.476
			49	11.603	34.358	17.894	11.701	14.834
			50	12.192	17.418	13.045	11.575	13.934
			51	22.762	10.333	11.488	16.906	20.25
			52	14.525	30.13	14.44	10.061	26.584
			53	14.691	22.838	16.295	10.274	23.617
			54	17.861	23.741	21.152	11.042	19.119
			55	11.692	37.438	13.125	8.584	30.215
			56	15.219	18.887	12.592	8.82	28.533
			57	10.493	22.94	10.525	10.09	13.09
			58	18.295	24.81	14.821	8.274	21.475
			59	20.457	18.949	11.358	8.156	12.448
			60	11.498	12.027	15.005	11.643	26.727
			61	10.626		15.274	4.983	26.257
			62	23.377		12.554	10.299	19.427
			63	18.164		14.597		19.155
			64	14.994		16.886		10.298
			65	14.707		14.798		15.565
			66	8.164		12.155		23.317
			67			13.058		19.349
			68			15.113		27.291
			69			21.566		21.402
			70			16.442
			71			11.67
			72			12.132
			73			23.944
			74			15.919
			75			14.972
			76			17.034
			77			20.292
			78			12.028

## Sheet: fig sup 1C
					ΔIgG	ΔIgG, 50% CAP-G	ΔH1	ΔH1, 70% CAP-G	ΔH1. 40% CAP-G	ΔH1ΔCAP-G
					1.35012	0.573033	1.43683	1.46803	0.757601	0.155521
					1.02302	0.525896	4.58566	4.59676	0.855206	0.130308
					0.92377	2.13549	1.42528	1.2771	0.756985	0.311505
					1	0.533891	2.77451	1.26616	0.667385	0.160823
					1.89716	0.670912	1.06549	1.14288	0.815365	0.160464
					0.8522	0.491523	1.45965	1.44541	0.918639	0.23811
					0.813083	0.43918	1.70701	1.41238	0.81987	0.166814
					2.11559	0.566571	1.72755	1.2082	0.863144	0.160729
					0.898184	0.48594	1.25774	1.58373	1.05568	0.122483
					0.883043	0.5624	2.67082	1.57282	0.664187	0.154576
					1.31484	0.586986	1.31678	1.09378	0.797463	0.143346
					0.915135	0.467794	1.20106	1.36838	1.33209	0.143622
					0.936575	0.512994	1.3596	1.44483	0.915749	0.183241
					3.31776	0.465404	1.17941	1.64166	0.857504	0.151458
					0.951649	0.528304	1.15725	1.579	1.16271	0.167392
					1.4114	0.910848	1.79591	1.43827	0.850124	0.133906
					1.52923	0.601501	1.57425	1.0125	0.830883	0.206887
					0.946093	0.731468	1.37705	1.67134	0.580951	0.13859
					0.965298	0.656262	1.4014	1.2833	0.887104	0.154895
					1.00285	0.611188	1.4896	1.48236	1.12836	0.152345
					0.947423	0.570042	1.938	1.16017	0.810366	0.359604
					1.68156	0.41026	1.65234	2.7277	0.81715	0.143612
					0.904209	0.529193	1.54781	1.3509	0.633321	0.184799
					1.26894	0.599483	2.74949	1.35186	1.3102	0.144277
					1.37538	0.600761	1.83868	1.153	2.16444	0.169169
							1.31706	1.37887	1.06205	0.1057

## Sheet: fig sup 1D
				ΔIgG	ΔIgG, 50% CAP-G	ΔH1	ΔH1, 70% CAP-G	ΔH1. 40% CAP-G	ΔH1ΔCAP-G
				9.088	14.2	19.781	15.693	21.152	6.923
				21.379	14.928	16.701	24.485	20.896	7.426
				27.381	21.41	13.421	30.798	21.482	9.231
				16.502	20.51	16.834	14.758	16.519	5.829
				22.963	11.69	54.869	19.204	11.091	9.136
				19.469	17.276	13.729	30.742	13.302	5.82
				24.218	11.308	29.325	13.179	13.25	8.074
				23.148	13.462	29.289	8.955	19.833	7.664
				16.742	18.475	18.701	11.882	15.915	6.813
				14.173	11.9	23.079	17.448	22.452	14.001
				19.44	15.464	22.282	18.197	18.646	10.211
				18.066	13.218	24.637	18.214	13.177	11.372
				19.755	22.719	18.237	14.928	14.49	7.058
				26.611	10.71	17.519	17.519	20.061	8.155
				33.76	10.923	22.602	10.707	24.914	7.216
				15.753	12.361	17.232	4.1	18.909	7.263
				15.667	13.91	25.752	17.776	20.716	9.517
				15.609	23.651	49.667	26.333	12.255	8.164
				19.603	9.29	28.922	34.666	11.271	5.948
				12.073	22.635	36.547	19.976	24.61	12.267
				13.327	11.179	22.88	22.901	17.435	12.23
				16.574	14.306	27.668	33.102	27.405	7.418
				16.883	20.62	39.413	24.769	18.189	7.099
				21.508	14.19	19.266	20.263	22.258	8.105
				12.627	11.932	24.783	19.32	16.4	4.5
				23.614	10.187	20.143	19.355	20.654	4.173
				19.384	16.102	26.4	28.551	23.81	7.848
				19.939	15.267	14.957	18.252	18.815	9.449
				10.976	12.483	9.847	17.733	18.518	7.063
				19.352	11.444	35.07	26.92	20.937	8.676
				17.848	6.873	16.876	25.653	16.833	3.649
				9.287	23.374	35.193	23.273	18.768	14.548
				23.897	11.2	17.066	29.153	19.381	9.769
				9.24	14.488	22.843	20.499	14.658	17.211
				20.508	10.665	39.072	19.768	17.359	10.55
				19.86	11.336	25.886	27.487	21.677	10.305
				11.483	12.026	16.497	21.362	20.845	9.511
				17.768	11.267	22.869	23.885	21.929	5.523
				13.652	9.724	30.295	36.136	12.431	7.63
				26.42	15.647	18.426	14.076	15.696	9.346
				26.652	12.401	29.315	14.147	27.83	5.201
				13.669	18.042	24.776	9.514	12.691	9.912
				17.219	17.052	21.868	13.641	13.827	7.379
				17.988	13.483	17.003	19.284	19.568	12.919
				26.719	15.259	23.895	24.935	14.044	7.726
				21.21	20.549	15.025	17.963	14.057	8.488
				13.13	12.602	17.028	14.028	14.151	8.077
				15.186	18.274	18.479	32.038	22.156	7.434
				12.524	9.445	17.637	14.16	17.315	10.173
				22.542	13.875	14.813	27.4	13.27	17.206
				16.246	13.451	26.218	16.741	13.654
				15.825	11.125	40.577	23.102	15.478
				17.391	13.862	22.458	14.89	12.178
				17.382	12.271	33.761	16.111	11.687
				22.33	14.641	10.318	42.931	14.072
				14.724	14.726	19.524	25.436	13.17
				18.01	14.573	20.95	27.931	16.643
				27.256	20.725	50.626	8.438	12.875
				13.624	14.637	15.833	16.549	14.26
				19.394	12.67	38.562	20.778	15.194
				12.969	8.584	19.137	16.314	13.393
				21.117	8.542	27.504	16.982	21.543
				32.056	12.687		20.653	7.603
				18.858	25.35		22.506	18.077
				12.291	18.086		27.671	14.562
				11.523	15.779		25.81	12.638
				14.801	13.025		22.861	11.6
				16.408	11.259		16.106	13.441
				11.95	8.919		21.003	15.881
				21.3	15.834		22.255	17.182
				14.959	22.165		21.206	16.571
				17.118	23.206		11.44	16.267
				14.161	11.867		14.385	17.171
				11.1	10.144		12.838	22.875
				14.758	19.739		20.819	14.265
					9.443		21.297	15.239
					17.469		16.852	14.169
							19.334	14.04
							24.494	32.309
							12.42	21.953
							20.395	17.413
							16.392	16.965
							17.477	18.635
							26.048	24.844
							26.646	18.233
							18.518	32.525
							17.022	6.388
								9.791
								16.304
								15.949
								9.794
								15.722
								18.982
								21.335
								12.048
								15.349
								23.075
								25.109
								23.085
								14.816
								17.919
								13.044
								17.591
								16.2
								14.837
								23.195
								14.687
								24.996
								16.422
								19.662
								16.669
								7.031
								15.819
								22.071
								20.728
								14.734
								30.203
								17.525
								19.528
								15.557

## Sheet: fig sup 2A
							%TOP2A
							100	75	50	25
							1.57088	1.24225	0.461452	0.596383
							0.996832	1.57681	1.13286	1.09489
							1.52257	1.59833	0.895728	0.481835
							0.975829	2.92433	0.643837	0.525765
							1.73482	1.5912	2.66106	0.663913
							1.67236	3.42001	3.09572	0.66501
							2.09291	1.81589	0.429525	0.594712
							1.51347	1.84625	2.42346	0.761276
							1.11531	1.79879	2.49074	0.6248
							1.12129	3.61657	0.753507	0.964834
							1.19505	1.56831	1.20743	0.245929
							2.8413	2.48508	5.91602	0.919453
							0.987183	2.9988	6.49657	0.690067
							1.00186	4.35412	2.11537	1.34268
							0.717846	3.79284	0.560157	0.496558
							0.956491	1.57609	1.30751	0.449463
							0.005014	2.34548	0.707324	1.43701
							1.44531	1.19903	0.977489	0.907714
							0.770352	1.42596	0.92162	0.465912
							1.24891	0.917065	1.02702	0.682057
							1.69307	1.56133	0.819969	0.834981
							2.51216	3.46233	1.44656	1.00676
							2.90979	1.63316	1.05646	0.817464
							1.75608	1.52112	0.964731	0.570298
							2.43485	1.83346	0.803259
							1.55644	2.02264	0.950422
							1.68193	1.11774	1.18403
							1.67025	1.38722	1.19545
							2.5932	1.83873	1.22935
							1.28158	1.53267	0.767598
								1.71776

## Sheet: fig sup 2B
							%TOP2A
							100	75	50	25
							16.6174	15.213	15.6463	15.4495
							6.74633	12.82	22.8518	21.8919
							14.9749	10.1752	15.6287	20.2028
							12.6081	14.239	23.5611	16.6506
							10.1947	11.7775	18.7821	12.4713
							11.1826	22.0304	14.1906	14.5264
							13.1672	17.0663	17.0798	17.0818
							12.385	16.5991	24.4885	15.768
							12.953	14.2434	15.9609	17.6788
							14.8393	19.6263	20.2934	16.1546
							14.3617	22.5053	18.9319	16.1039
							18.7105	22.5339	17.0404	22.7427
							15.4394	15.9378	14.1134	25.9974
							13.5688	13.8512	22.1067	22.6093
							9.3148	16.8447	24.2401	20.3799
							11.7389	10.0925	16.4123	17.4496
							9.51811	16.3719	7.73183	26.7989
							13.8105	27.5516	15.4848	13.3251
							18.7748	8.7125	19.0152	15.3355
							15.0888	18.5022	21.6644	18.401
							15.4389	19.3809	12.0703	14.7002
							20.622	9.29074	16.2885	29.7008
							19.729	23.8233	11.8932	25.0345
							18.1326	9.61756	16.9639	16.1663
							18.5034	16.7351	19.1028	14.2126
							19.5471	27.2495	17.2281	17.8693
							10.28	17.909	21.0052	16.3638
							16.1302	20.982	19.0784	28.5487
							13.4468	23.1789	13.3795	18.1078
							11.4485	18.0019	13.1711	15.9085
							16.0557	20.6758	17.6541	14.6556
							15.8332	15.9406	22.1392	13.6204
							19.2578	19.6667	17.307	18.12
							19.1441	26.0912	12.0837	15.3567
							13.4209	19.3382	17.4923	18.5387
							16.3179	24.7104	15.4942	19.8237
							13.9606	19.174	29.1417	11.1667
							12.2006	15.4044	12.9092	10.3804
							10.8254	20.0615	8.23006	17.3815
							15.7092	14.267	16.4056	20.1002
							16.9817	17.009	9.84772	14.2087
							20.9326	15.2786	15.3936	22.0173
							13.6924	15.1588	14.0671	20.4159
							15.1606	17.7484	14.6559	19.7574
							10.7119	16.7184	14.7772	19.202
							16.9978	19.3605	10.4222	17.8839
							12.8854	18.2177	18.3253	23.2279
							19.1872	21.0409	14.7726	26.4382
							17.0034	18.9862	17.7129	20.3599
							15.3	26.0489	15.0486	17.8114
							13.9549	13.2306	24.6751	25.7935
							12.9787	28.3182	14.7139	18.0915
							21.7788	20.0256	15.4133	16.5089
							14.0062	18.6078	17.0134	13.5023
							9.98111	15.13	10.2978	18.0102
							16.4726	18.9841	16.5464	12.5694
							19.4375	17.4205	19.1915	14.8664
							23.3536	11.5134	11.3835	22.9821
							7.90647	18.8591	19.0347	13.8139
							6.85975	19.6555	20.1938	28.1674
							11.611	19.0065	13.1771	20.6896
							14.1353	18.5414	15.5559	17.8919
							13.6401	14.7004	15.0928	14.6315
							10.4824	10.4845	17.1178	18.2323
							18.0205	13.8046	11.391	20.8265
							19.2899	15.9804	15.3195	27.6109
							19.3469	12.7613	14.4557	24.055
							12.5435	9.47204	16.4412	16.4552
							13.3205	16.1265	7.35056	20.8934
							13.2186	18.7247	17.4291	15.6375
							15.2939	19.2236	12.112	18.9815
							12.6192	13.5162	14.0423	12.1195
							10.32	17.6744	20.7286	18.1338
							12.058	10.1241	13.8947	19.1603
							11.7702	16.4602	11.9772	15.8712
							15.3526	15.4277	12.7365	25.4123
							13.1729	9.56429	16.3666	19.0737
							12.5574	14.3422	17.972	18.4468
							16.695	15.0443	19.2089	19.3188
							21.2498	16.4771	29.6569	19.2662
							14.2279	12.2459	22.9789	11.4684
							13.7867	33.8978	15.9921	18.0423
							12.4769	15.2983	16.3391	13.4477
							15.9448	12.0552	15.7078	6.68597
							13.8	13.7999	22.3791	11.611
							16.261	14.7347	23.0158	12.9379
							11.7092	14.6707	24.729	17.0856
							16.7585	14.2237	13.7562	18.8193
							16.4764	17.5895	15.5447	22.8746
							10.7324	22.7734	12.4019	14.1546
							22.7381	21.433	9.77737	15.5871
							21.0195	16.0241	12.3224	20.8057
							17.7035	18.1083	11.1994	18.8433
							18.5342	11.7891	19.9394	24.0834
							19.0901	12.2752	20.2524
							19.0892		16.2881
							20.5066		18.737
							11.6431		14.5918
							16.0458
							17.8437
							9.9069
							14.5434
							19.1652

## Sheet: fig sup 2C
							%TOP2A
							ΔIgG		ΔH1
							100	75	50	25
							1.44626	0.572328	2.92617	2.2919
							0.470613	0.513035	3.02791	1.76607
							1.20399	0.750718	3.26891	1.11243
							1.05031	0.455448	3.10871	0.047872
							0.740347	0.908808	1.90682	1.70782
							0.65459	0.575529	5.30968	1.2685
							0.632767	0.711993	1.76812	1.00672
							0.709221	0.577141	4.24451	1.8343
							0.716611	0.473191	2.83189	1.30584
							0.736783	0.50233	3.66502	1.20607
							1.30364	0.417725	3.52563	1.26654
							1.2208	0.39332	3.19542	1.65869
							1.54718	0.482538	3.1293	1.12997
							0.580446	0.563825	2.67362	1.24738
							0.671733	0.799965	1.97385	1.73308
							0.634882	0.419122	1.6675	0.841831
							1.2247	0.450382	4.65473	0.955352
							0.617602	0.924681	0.797062	1.11239
							0.71383	0.614656	1.82782	1.26346
							0.637567	0.521024	1.42229	1.32945
							1.37103	0.50357	2.51165	1.18652
							0.953609	0.570512	2.97701	1.53435
							1.31354	0.599672	2.82895	1.55289
							1.60869	0.763205	2.99883	1.43157
							1.27212	0.409438	3.48538	1.01272
								0.512333	3.23263	1.29823
								0.645412		0.807377
										2.1214

## Sheet: fig sup 2D
								%TOP2A
								ΔIgG		ΔH1
								100	75	50	25
								0.595796	0.570394	1.24791	1.69242
								0.526321	0.513639	1.32232	1.2707
								0.588389	0.664091	1.28914	1.13787
								0.58884	0.482144	1.20576	0.011396
								0.673088	0.851569	0.943404	1.21349
								0.66073	0.493026	2.04864	1.2026
								0.645952	0.68075	1.50291	1.30927
								0.629636	0.533445	1.56597	1.76792
								0.633338	0.434726	1.15995	1.22865
								0.683963	0.625268	1.46287	1.46243
								0.506081	0.521293	2.34947	1.25599
								0.54924	0.533883	1.2535	1.57412
								0.594372	0.547665	1.212	1.13784
								0.539473	0.65846	1.38157	1.15157
								0.761748	0.702405	1.73625	1.45235
								0.674355	0.606378	1.57431	0.903355
								1.69893	0.498323	1.85933	1.00664
								0.706362	0.814413	0.991482	1.10484
								0.711247	0.70321	1.33672	1.26745
								0.684538	0.616845	1.14099	1.11618
								0.582105	0.561438	1.01032	1.22918
								0.535373	0.63388	1.2003	1.42004
								0.5932	0.576765	1.18266	1.37903
								0.697326	0.813484	1.2042	1.21684
								0.563009	0.574784	1.44514	1.11071
									0.53079	1.47868	1.30705
									0.702896		0.956047
											1.6308

[truncated: 1 more sheets: fig sup 2E]
