# Supplementary material for: Linker histone H1.8 inhibits chromatin binding of condensins and DNA topoisomerase II to tune chromosome length and individualization
Source: eLife journal article supplement (doi:10.7554/elife.68918), 2021-08-18
Supplement: supp [file Figure 4-plot data 1.xlsx]

## Sheet: Fig4B
	ΔIgG	ΔH1	ΔH1ΔCAP-G	ΔH1ΔCAP-D3
1124.72	1.33e-07	9.12e-08	1.1e-07	9.84e-08
1422.67	8.7e-08	6.05e-08	8.09e-08	7.85e-08
1799.56	6.65e-08	4.82e-08	6.76e-08	6.76e-08
2276.28	5.55e-08	4.18e-08	5.95e-08	5.95e-08
2878.67	4.84e-08	3.74e-08	5.32e-08	5.31e-08
3640.81	4.32e-08	3.36e-08	4.73e-08	4.64e-08
4605.22	3.8e-08	2.99e-08	4.22e-08	4.08e-08
5824.74	3.42e-08	2.67e-08	3.72e-08	3.61e-08
7367.6	3e-08	2.36e-08	3.21e-08	3.1e-08
9319.1	2.62e-08	2.07e-08	2.76e-08	2.69e-08
11787.6	2.26e-08	1.79e-08	2.38e-08	2.3e-08
14909.5	1.96e-08	1.6e-08	2.04e-08	2e-08
18858.7	1.7e-08	1.4e-08	1.73e-08	1.74e-08
23853.7	1.48e-08	1.24e-08	1.49e-08	1.51e-08
30171.1	1.29e-08	1.1e-08	1.29e-08	1.32e-08
38161.9	1.13e-08	9.76e-09	1.1e-08	1.15e-08
48269.5	9.9e-09	8.65e-09	9.49e-09	1.01e-08
61054.2	8.68e-09	7.71e-09	8.21e-09	8.86e-09
77224.5	7.64e-09	6.83e-09	7.01e-09	7.72e-09
97677.7	6.74e-09	5.98e-09	5.98e-09	6.66e-09
123548	5.88e-09	5.22e-09	5.05e-09	5.71e-09
156271	5.14e-09	4.47e-09	4.27e-09	4.84e-09
197660	4.44e-09	3.75e-09	3.55e-09	4.04e-09
250011	3.81e-09	3.09e-09	2.86e-09	3.31e-09
316228	3.2e-09	2.47e-09	2.24e-09	2.62e-09
399982	2.64e-09	1.94e-09	1.69e-09	2.01e-09
505920	2.15e-09	1.49e-09	1.26e-09	1.52e-09
639916	1.72e-09	1.14e-09	9.48e-10	1.14e-09
809400	1.38e-09	8.56e-10	7.18e-10	8.4e-10
1023774	1.11e-09	6.37e-10	5.56e-10	6.08e-10
1294925	8.76e-10	4.69e-10	4.32e-10	4.33e-10
1637893	6.94e-10	3.41e-10	3.4e-10	2.96e-10
2071699	5.43e-10	2.33e-10	2.72e-10	1.93e-10
2620399	4.22e-10	1.46e-10	2.19e-10	1.18e-10
3314425	3.11e-10	8e-11	1.77e-10	6.63e-11
4192267	2.16e-10	4.48e-11	1.42e-10	3.97e-11
5302611	1.38e-10	2.74e-11	1.1e-10	2.65e-11
6707035	8.18e-11	1.98e-11	8.14e-11	2.07e-11
8483429	4.71e-11	1.44e-11	5.42e-11	1.58e-11
10730309	2.98e-11	1.16e-11	3.35e-11	1.28e-11
13572288	2.09e-11	9.34e-12	2e-11	1.03e-11
17166979	1.59e-11	7.64e-12	1.26e-11	8.16e-12
21713743	1.26e-11	6.62e-12	9.02e-12	6.98e-12
27464741	1.04e-11	5.24e-12	6.85e-12	5.58e-12
34738921	8.87e-12	4.48e-12	5.44e-12	4.81e-12
43939706	8.43e-12	4.43e-12	5.23e-12	4.55e-12
55577366	1.3e-11	7.79e-12	9.75e-12	6.25e-12
70297321	6.32e-12	2.79e-12	3.34e-12	2.87e-12
88915933	5.5e-12	2.2e-12	3.48e-12	2.65e-12

## Sheet: Fig4C
Distbins	ΔIgG	ΔH1	Distbins_2	ΔIgG_2	ΔH1_2
1275.45	-3.08	-3.53	1434.49	-0.836	-1.20921
1613.37	-2.35	-2.76	1814.51	-0.804	-1.147
2040.72	-1.46	-1.6	2294.99	-0.764	-1.07186
2580.93	-0.871	-0.88	2902.6	-0.718	-0.98315
3264.36	-0.664	-0.689	3671.15	-0.663	-0.87917
4128.63	-0.462	-0.419	4643.35	-0.602	-0.76211
5222.25	-0.44	-0.365	5873.19	-0.537	-0.63638
6605.28	-0.637	-0.614	7428.78	-0.472	-0.50871
8354.94	-0.701	-0.65	9396.51	-0.42	-0.40227
10567.9	-0.644	-0.613	11885.3	-0.426	-0.39571
13367	-0.573	-0.525	15033.4	-0.479	-0.47491
16907.5	-0.613	-0.517	19015.2	-0.491	-0.49371
21385.7	-0.56	-0.535	24051.5	-0.478	-0.47572
27049.8	-0.52	-0.467	30421.6	-0.453	-0.45078
34213.7	-0.555	-0.463	38478.8	-0.415	-0.41971
43275.5	-0.47	-0.411	48670.2	-0.381	-0.38237
54737.4	-0.412	-0.35	61560.9	-0.35	-0.34865
69235	-0.429	-0.361	77865.6	-0.326	-0.33186
87572.1	-0.389	-0.329	98488.7	-0.301	-0.32207
110766	-0.373	-0.321	124574	-0.284	-0.32544
140103	-0.357	-0.361	157568	-0.284	-0.3457
177210	-0.388	-0.389	199301	-0.305	-0.37999
224145	-0.442	-0.429	252087	-0.346	-0.43456
283511	-0.477	-0.503	318853	-0.397	-0.50559
358600	-0.532	-0.583	403303	-0.462	-0.59114
453578	-0.614	-0.688	510120	-0.549	-0.69811
573710	-0.707	-0.806	645228	-0.653	-0.82271
725660	-0.793	-0.914	816120	-0.772	-0.9651
917855	-0.876	-1.02	1032273	-0.911	-1.13586
1160954	-0.959	-1.1	1305676	-1.06	-1.34703
1468438	-1.05	-1.24	1651491	-1.231	-1.61186
1857362	-1.13	-1.55	2088897	-1.433	-1.90684
2349294	-1.24	-2.04	2642152	-1.686	-2.18594
2971517	-1.43	-2.54	3341940	-1.968	-2.30872
3758539	-1.68	-2.69	4227070	-2.208	-2.24204
4754007	-2	-2.38	5346632	-2.263	-1.89392
6013131	-2.2	-1.76	6762715	-2.113	-1.54932
7605740	-2.15	-1.44	8553855	-1.787	-1.15996
9620160	-1.85	-1.24	10819389	-1.348	-0.8694
12168110	-1.26	-0.728	13684960	-0.976	-0.66943
15390897	-0.91	-0.708	17309493	-0.637	-0.54212
19467257	-0.768	-0.753	21894003	-0.46	-0.46788
24623262	-0.576	-0.572	27692744	-0.354	-0.41351
31144861	-0.504	-0.596	35027311	-0.325	-0.40041
39393740	-0.41	-0.505	44304478	-0.295	-0.36341
49827377	-0.348	-0.43	56038750	-0.247	-0.30962
63024418	-0.222	-0.296	70880905	-0.271	-0.28382
62505519	6.52e-10	1.11e-09
79060432	5.79e-10	9.87e-10

## Sheet: Fig4D
	ΔIgG	ΔH1	ΔCAPD3	ΔH1ΔCAPG	ΔH1ΔCAPD3	ΔCAPG	ΔCAP-GΔCAP-D3	ΔH1ΔCAP-GΔCAP-D3
1280	-1.09	-1.27	-1.64	-1.59	-2.35	-1.07	-1.39	-1.87
1610	-0.81	-1.08	-1.31	-1.17	-1.59	-0.93	-1.13	-1.56
2040	-0.61	-0.84	-0.94	-0.81	-0.94	-0.72	-0.84	-1.18
2580	-0.51	-0.67	-0.73	-0.63	-0.61	-0.57	-0.67	-0.87
3260	-0.48	-0.62	-0.63	-0.53	-0.52	-0.57	-0.61	-0.68
4130	-0.47	-0.56	-0.54	-0.48	-0.47	-0.57	-0.58	-0.56
5220	-0.49	-0.52	-0.5	-0.48	-0.46	-0.55	-0.57	-0.49
6610	-0.52	-0.57	-0.54	-0.52	-0.52	-0.64	-0.61	-0.57
8350	-0.55	-0.59	-0.59	-0.6	-0.59	-0.67	-0.7	-0.65
10600	-0.57	-0.56	-0.63	-0.61	-0.59	-0.68	-0.7	-0.67
13400	-0.56	-0.52	-0.59	-0.62	-0.54	-0.69	-0.67	-0.65
16900	-0.57	-0.54	-0.56	-0.64	-0.54	-0.7	-0.68	-0.64
21400	-0.57	-0.51	-0.56	-0.64	-0.52	-0.69	-0.66	-0.64
27000	-0.58	-0.47	-0.56	-0.66	-0.51	-0.7	-0.67	-0.66
34200	-0.58	-0.48	-0.56	-0.69	-0.52	-0.69	-0.67	-0.68
43300	-0.53	-0.47	-0.48	-0.66	-0.47	-0.64	-0.61	-0.56
54700	-0.54	-0.47	-0.49	-0.65	-0.47	-0.63	-0.65	-0.55
69200	-0.57	-0.52	-0.56	-0.73	-0.55	-0.66	-0.73	-0.65
87600	-0.57	-0.54	-0.51	-0.71	-0.55	-0.65	-0.71	-0.57
111000	-0.59	-0.56	-0.5	-0.7	-0.57	-0.65	-0.73	-0.57
140000	-0.62	-0.61	-0.52	-0.71	-0.61	-0.68	-0.77	-0.6
177000	-0.67	-0.68	-0.54	-0.77	-0.67	-0.73	-0.84	-0.65
224000	-0.72	-0.75	-0.58	-0.86	-0.73	-0.8	-0.92	-0.7
284000	-0.79	-0.83	-0.62	-0.9	-0.78	-0.85	-0.96	-0.72
359000	-0.86	-0.9	-0.66	-0.91	-0.81	-0.85	-0.96	-0.77
454000	-0.92	-0.96	-0.71	-0.88	-0.87	-0.84	-0.93	-0.8
574000	-0.96	-1.05	-0.76	-0.82	-0.93	-0.85	-0.88	-0.81
726000	-0.98	-1.09	-0.82	-0.76	-0.99	-0.83	-0.83	-0.82
918000	-1.01	-1.11	-0.88	-0.71	-1.05	-0.82	-0.8	-0.83
1160000	-1.05	-1.14	-0.95	-0.68	-1.1	-0.83	-0.79	-0.84
1470000	-1.1	-1.27	-1.06	-0.68	-1.23	-0.86	-0.84	-0.89
1860000	-1.2	-1.59	-1.21	-0.7	-1.5	-0.9	-0.91	-0.91
2350000	-1.35	-2.09	-1.41	-0.71	-1.94	-0.92	-0.93	-0.92
2970000	-1.57	-2.56	-1.72	-0.75	-2.44	-0.98	-0.98	-0.94
3760000	-1.79	-2.63	-2.05	-0.84	-2.63	-1.04	-1.04	-0.97
4750000	-1.94	-2.2	-2.26	-1.04	-2.35	-1.11	-1.09	-1.07
6010000	-1.88	-1.52	-2.21	-1.39	-1.81	-1.23	-1.18	-1.28
7610000	-1.68	-1.21	-1.97	-1.92	-1.56	-1.44	-1.36	-1.6
9620000	-1.41	-1.01	-1.56	-2.41	-1.33	-1.64	-1.5	-1.91
12200000	-1.04	-0.57	-0.96	-2.57	-0.71	-1.68	-1.52	-1.98
15400000	-0.91	-0.58	-0.73	-2.35	-0.66	-1.57	-1.45	-1.78
19500000	-0.87	-0.6	-0.64	-1.73	-0.55	-1.38	-1.28	-1.31
24600000	-0.75	-0.45	-0.52	-1.05	-0.3	-1.14	-1.1	-0.88
31100000	-0.68	-0.45	-0.55	-0.73	-0.38	-0.97	-0.98	-0.7
39400000	-0.55	-0.38	-0.44	-0.44	-0.26	-0.77	-0.74	-0.45
49800000	-0.47	-0.42	-0.43	-0.3	-0.42	-0.54	-0.52	-0.3
63000000	-0.3	-0.34	-0.3	-0.08	-0.43	-0.3	-0.26	-0.14
62500000	0	0	0	0	0	0	0	0
79100000	0	0	0	0	0	0	0	0

## Sheet: Fig4E
ΔIgG	ΔH1	ΔCAPG	ΔCAPD3	ΔCAPGΔCAPD3	ΔH1ΔCAPG	ΔH1ΔCAPD3	ΔH1ΔCAPGΔCAPD3
6010000	2970000	12200000	4750000	12200000	9620000	2970000	9620000
4750000	3760000	12200000	4750000	12200000	12200000	3760000	12200000

## Sheet: fig sup 1A
Distbins	ΔIgG-1	ΔH1-1	ΔIgG-2	ΔH1-2
1000	1.41e-07	9.68e-08
1265	9.2e-08	6.34e-08
1600	6.96e-08	5.05e-08
2024	5.83e-08	4.38e-08
2560	5.09e-08	3.93e-08
3237	4.52e-08	3.5e-08
4095	3.99e-08	3.1e-08
5179	3.58e-08	2.78e-08
6551	3.13e-08	2.46e-08
8286	2.72e-08	2.16e-08
10481	2.34e-08	1.86e-08
13257	2.03e-08	1.65e-08
16768	1.77e-08	1.46e-08
21210	1.54e-08	1.28e-08
26827	1.34e-08	1.14e-08
33932	1.17e-08	1.01e-08
42919	1.02e-08	8.96e-09
54287	9.14e-09	8.07e-09
68665	7.95e-09	7.07e-09
86851	6.99e-09	6.18e-09
109854	6.12e-09	5.37e-09
138950	5.33e-09	4.6e-09
175751	4.61e-09	3.86e-09
222300	3.93e-09	3.17e-09
281177	3.31e-09	2.54e-09
355648	2.73e-09	1.99e-09
449843	2.21e-09	1.53e-09
568987	1.77e-09	1.16e-09
719686	1.41e-09	8.65e-10
910298	1.12e-09	6.4e-10
1151395	8.86e-10	4.69e-10
1456348	6.98e-10	3.4e-10
1842070	5.39e-10	2.28e-10
2329952	4.11e-10	1.4e-10
2947052	2.99e-10	7.74e-11
3727594	2.06e-10	4.44e-11
4714866	1.31e-10	2.8e-11
5963623	7.85e-11	2.03e-11
7543120	4.77e-11	1.61e-11
9540955	2.98e-11	1.2e-11
12067926	2.08e-11	9.49e-12
15264180	1.65e-11	8.24e-12
19306977	1.27e-11	6.41e-12
24420531	1.08e-11	5.61e-12
30888436	9.08e-12	4.6e-12
39069399	8.11e-12	4.04e-12
49417134	7.28e-12	3.48e-12
62505519	6.76e-12	3.06e-12
79060432	6.53e-12	2.86e-12
100000000
1124.72			1.33e-07	9.12e-08
1422.67			8.7e-08	6.05e-08
1799.56			6.65e-08	4.82e-08
2276.28			5.55e-08	4.18e-08
2878.67			4.84e-08	3.74e-08
3640.81			4.32e-08	3.36e-08
4605.22			3.8e-08	2.99e-08
5824.74			3.42e-08	2.67e-08
7367.6			3e-08	2.36e-08
9319.1			2.62e-08	2.07e-08
11787.6			2.26e-08	1.79e-08
14909.5			1.96e-08	1.6e-08
18858.7			1.7e-08	1.4e-08
23853.7			1.48e-08	1.24e-08
30171.1			1.29e-08	1.1e-08
38161.9			1.13e-08	9.76e-09
48269.5			9.9e-09	8.65e-09
61054.2			8.68e-09	7.71e-09
77224.5			7.64e-09	6.83e-09
97677.7			6.74e-09	5.98e-09
123548			5.88e-09	5.22e-09
156271			5.14e-09	4.47e-09
197660			4.44e-09	3.75e-09
250011			3.81e-09	3.09e-09
316228			3.2e-09	2.47e-09
399982			2.64e-09	1.94e-09
505920			2.15e-09	1.49e-09
639916			1.72e-09	1.14e-09
809400			1.38e-09	8.56e-10
1023774			1.11e-09	6.37e-10
1294925			8.76e-10	4.69e-10
1637893			6.94e-10	3.41e-10
2071699			5.43e-10	2.33e-10
2620399			4.22e-10	1.46e-10
3314425			3.11e-10	8e-11
4192267			2.16e-10	4.48e-11
5302611			1.38e-10	2.74e-11
6707035			8.18e-11	1.98e-11
8483429			4.71e-11	1.44e-11
10730309			2.98e-11	1.16e-11
13572288			2.09e-11	9.34e-12
17166979			1.59e-11	7.64e-12
21713743			1.26e-11	6.62e-12
27464741			1.04e-11	5.24e-12
34738921			8.87e-12	4.48e-12
43939706			8.43e-12	4.43e-12
55577366			1.3e-11	7.79e-12
70297321			6.32e-12	2.79e-12
88915933			5.5e-12	2.2e-12

## Sheet: fig sup 1B
Genomic Distance (bp)	ΔIgG-chr1L	ΔIgG-chr1S	ΔIgG-chr2L	ΔIgG-chr2S	ΔH1-chr1L	ΔH1-chr1S	ΔH1-chr2L	ΔH1-chr2S
1124.72	1.39e-07	1.23e-07	1.36e-07	1.04e-07	9.35e-08	8.2e-08	9.29e-08	7.51e-08
1422.67	8.73e-08	8.59e-08	8.87e-08	6.65e-08	6.29e-08	5.85e-08	6.13e-08	4.69e-08
1799.56	6.84e-08	6.37e-08	6.7e-08	5.29e-08	4.88e-08	4.55e-08	5.24e-08	3.63e-08
2276.28	5.75e-08	5.29e-08	5.89e-08	4.22e-08	4.37e-08	3.87e-08	4.37e-08	3.22e-08
2878.67	5.1e-08	4.71e-08	5.05e-08	3.75e-08	3.93e-08	3.59e-08	4e-08	2.81e-08
3640.81	4.61e-08	3.91e-08	4.5e-08	3.25e-08	3.64e-08	3.15e-08	3.54e-08	2.53e-08
4605.22	4.07e-08	3.64e-08	3.9e-08	2.89e-08	3.08e-08	2.81e-08	3.14e-08	2.33e-08
5824.74	3.57e-08	3.32e-08	3.67e-08	2.63e-08	2.72e-08	2.5e-08	2.78e-08	2.07e-08
7367.6	3.15e-08	2.91e-08	3.06e-08	2.3e-08	2.5e-08	2.15e-08	2.52e-08	1.81e-08
9319.1	2.76e-08	2.49e-08	2.79e-08	2.03e-08	2.14e-08	1.93e-08	2.28e-08	1.56e-08
11787.6	2.3e-08	2.09e-08	2.39e-08	1.73e-08	1.85e-08	1.66e-08	1.9e-08	1.37e-08
14909.5	2.07e-08	1.84e-08	2.06e-08	1.51e-08	1.66e-08	1.49e-08	1.73e-08	1.19e-08
18858.7	1.8e-08	1.62e-08	1.82e-08	1.33e-08	1.46e-08	1.34e-08	1.49e-08	1.08e-08
23853.7	1.56e-08	1.43e-08	1.56e-08	1.13e-08	1.27e-08	1.17e-08	1.31e-08	9.47e-09
30171.1	1.34e-08	1.24e-08	1.36e-08	1.06e-08	1.13e-08	1.05e-08	1.17e-08	8.94e-09
38161.9	1.17e-08	1.08e-08	1.18e-08	8.72e-09	1.01e-08	9.34e-09	1.06e-08	7.53e-09
48269.5	1.03e-08	9.4e-09	1.04e-08	7.49e-09	8.84e-09	8.3e-09	9.11e-09	6.73e-09
61054.2	9.08e-09	8.4e-09	9.02e-09	6.7e-09	8.02e-09	7.46e-09	8.1e-09	6e-09
77224.5	8e-09	7.3e-09	8.05e-09	5.99e-09	7.06e-09	6.34e-09	7.29e-09	5.3e-09
97677.7	7.06e-09	6.45e-09	7.14e-09	5.16e-09	6.21e-09	5.82e-09	6.31e-09	4.64e-09
123548	6.16e-09	5.55e-09	6.2e-09	4.6e-09	5.3e-09	4.94e-09	5.58e-09	4.03e-09
156271	5.35e-09	4.88e-09	5.44e-09	4.02e-09	4.69e-09	4.16e-09	4.73e-09	3.39e-09
197660	4.69e-09	4.31e-09	4.72e-09	3.46e-09	3.92e-09	3.58e-09	4.02e-09	2.87e-09
250011	3.98e-09	3.62e-09	3.98e-09	2.92e-09	3.2e-09	2.92e-09	3.27e-09	2.37e-09
316228	3.32e-09	3.05e-09	3.37e-09	2.46e-09	2.55e-09	2.39e-09	2.56e-09	1.91e-09
399982	2.75e-09	2.54e-09	2.75e-09	2.05e-09	1.99e-09	1.87e-09	2e-09	1.49e-09
505920	2.22e-09	2.04e-09	2.24e-09	1.67e-09	1.57e-09	1.46e-09	1.58e-09	1.15e-09
639916	1.8e-09	1.64e-09	1.82e-09	1.33e-09	1.18e-09	1.1e-09	1.2e-09	8.82e-10
809400	1.45e-09	1.34e-09	1.43e-09	1.06e-09	8.86e-10	8.22e-10	8.89e-10	6.52e-10
1023774	1.16e-09	1.06e-09	1.13e-09	8.52e-10	6.66e-10	6.14e-10	6.68e-10	4.89e-10
1294925	9.14e-10	8.42e-10	8.97e-10	6.69e-10	4.8e-10	4.55e-10	4.73e-10	3.63e-10
1637893	7.22e-10	6.67e-10	7.15e-10	5.29e-10	3.51e-10	3.34e-10	3.5e-10	2.64e-10
2071699	5.67e-10	5.32e-10	5.59e-10	4.13e-10	2.4e-10	2.35e-10	2.32e-10	1.78e-10
2620399	4.33e-10	3.99e-10	4.26e-10	3.24e-10	1.46e-10	1.43e-10	1.43e-10	1.09e-10
3314425	3.23e-10	2.94e-10	3.11e-10	2.42e-10	8.35e-11	7.66e-11	7.7e-11	6.12e-11
4192267	2.2e-10	2.06e-10	2.17e-10	1.67e-10	4.5e-11	4.29e-11	4.39e-11	3.53e-11
5302611	1.41e-10	1.34e-10	1.38e-10	1.06e-10	2.81e-11	2.68e-11	2.83e-11	2.07e-11
6707035	8.22e-11	7.88e-11	8.09e-11	6.33e-11	1.87e-11	1.86e-11	1.96e-11	1.41e-11
8483429	4.77e-11	4.67e-11	5.11e-11	3.54e-11	1.51e-11	1.4e-11	1.62e-11	1.07e-11
10730309	3.05e-11	2.91e-11	3.34e-11	2.32e-11	1.16e-11	1.06e-11	1.42e-11	9.07e-12
13572288	2.17e-11	2.06e-11	2.14e-11	1.61e-11	9.34e-12	8.82e-12	1e-11	7.04e-12
17166979	1.65e-11	1.56e-11	1.78e-11	1.16e-11	7.68e-12	7.04e-12	9.2e-12	5.85e-12
21713743	1.27e-11	1.2e-11	1.34e-11	9.39e-12	6.54e-12	6.15e-12	6.76e-12	4.74e-12
27464741	1.07e-11	1.02e-11	1.24e-11	7.43e-12	5.34e-12	4.98e-12	6.54e-12	4e-12
34738921	8.98e-12	9.04e-12	9.2e-12	6e-12	4.58e-12	4.51e-12	4.53e-12	3.2e-12
43939706	8e-12	7.7e-12	8.01e-12	4.76e-12	4.14e-12	3.64e-12	3.77e-12	2.5e-12
55577366	7.12e-12	7.15e-12	7.29e-12	3.53e-12	3.64e-12	3.34e-12	3.19e-12	1.89e-12
70297321	6.47e-12	6.23e-12	8.68e-12	1.78e-12	2.94e-12	2.46e-12	3.21e-12	8.55e-13
88915933	5.77e-12			4.06e-15	2.57e-12

## Sheet: fig sup 1C
	ΔIgG	ΔH1	ΔCAP-G	ΔCAP-D3	ΔCAP-GΔCAP-D3
1000	9.09e-08	1.45e-07	1.31e-07	1.18e-07	1.3e-07
1265	6.78e-08	1.06e-07	1.01e-07	7.79e-08	9.13e-08
1600	5.47e-08	7.99e-08	7.91e-08	5.42e-08	6.75e-08
2024	4.65e-08	6.4e-08	6.56e-08	4.23e-08	5.41e-08
2560	4.11e-08	5.41e-08	5.65e-08	3.51e-08	4.58e-08
3237	3.67e-08	4.68e-08	5.02e-08	3.02e-08	3.95e-08
4095	3.28e-08	4.04e-08	4.32e-08	2.62e-08	3.44e-08
5179	2.95e-08	3.6e-08	3.84e-08	2.35e-08	3.01e-08
6551	2.62e-08	3.17e-08	3.33e-08	2.07e-08	2.64e-08
8286	2.31e-08	2.76e-08	2.85e-08	1.83e-08	2.27e-08
10481	2.02e-08	2.4e-08	2.44e-08	1.57e-08	1.9e-08
13257	1.77e-08	2.13e-08	2.07e-08	1.36e-08	1.63e-08
16768	1.56e-08	1.88e-08	1.76e-08	1.19e-08	1.39e-08
21210	1.36e-08	1.66e-08	1.5e-08	1.04e-08	1.19e-08
26827	1.19e-08	1.49e-08	1.28e-08	9.17e-09	1.02e-08
33932	1.03e-08	1.33e-08	1.08e-08	8.03e-09	8.68e-09
42919	9.1e-09	1.19e-08	9.23e-09	7.04e-09	7.44e-09
54287	8.06e-09	1.07e-08	8.02e-09	6.42e-09	6.53e-09
68665	7.06e-09	9.49e-09	6.87e-09	5.6e-09	5.47e-09
86851	6.18e-09	8.38e-09	5.89e-09	4.95e-09	4.64e-09
109854	5.4e-09	7.39e-09	5.07e-09	4.42e-09	3.92e-09
138950	4.69e-09	6.45e-09	4.34e-09	3.91e-09	3.29e-09
175751	4.04e-09	5.55e-09	3.69e-09	3.47e-09	2.73e-09
222300	3.43e-09	4.7e-09	3.09e-09	3.04e-09	2.22e-09
281177	2.87e-09	3.91e-09	2.53e-09	2.64e-09	1.77e-09
355648	2.37e-09	3.17e-09	2.07e-09	2.28e-09	1.41e-09
449843	1.92e-09	2.56e-09	1.7e-09	1.94e-09	1.13e-09
568987	1.54e-09	2.02e-09	1.39e-09	1.63e-09	9.15e-10
719686	1.22e-09	1.56e-09	1.14e-09	1.36e-09	7.47e-10
910298	9.69e-10	1.21e-09	9.46e-10	1.11e-09	6.19e-10
1151395	7.58e-10	9.26e-10	7.78e-10	8.96e-10	5.14e-10
1456348	5.92e-10	7.04e-10	6.43e-10	7.11e-10	4.28e-10
1842070	4.5e-10	5.05e-10	5.19e-10	5.43e-10	3.46e-10
2329952	3.35e-10	3.26e-10	4.21e-10	4.02e-10	2.8e-10
2947052	2.36e-10	1.78e-10	3.37e-10	2.76e-10	2.23e-10
3727594	1.58e-10	9e-11	2.66e-10	1.74e-10	1.76e-10
4714866	9.89e-11	4.85e-11	2.06e-10	1.01e-10	1.36e-10
5963623	6.18e-11	3.19e-11	1.57e-10	5.75e-11	1.05e-10
7543120	4.03e-11	2.4e-11	1.15e-10	3.46e-11	7.77e-11
9540955	2.78e-11	1.8e-11	7.88e-11	2.25e-11	5.5e-11
12067926	2.09e-11	1.5e-11	5.2e-11	1.67e-11	3.8e-11
15264180	1.71e-11	1.39e-11	3.54e-11	1.45e-11	2.68e-11
19306977	1.36e-11	1.14e-11	2.46e-11	1.18e-11	1.91e-11
24420531	1.15e-11	1.06e-11	1.86e-11	1.08e-11	1.48e-11
30888436	9.57e-12	9.22e-12	1.44e-11	9.23e-12	1.14e-11
39069399	8.37e-12	8.57e-12	1.18e-11	8.39e-12	9.39e-12
49417134	7.39e-12	7.73e-12	1.01e-11	7.5e-12	8.07e-12
62505519	6.72e-12	7.04e-12	9.21e-12	6.87e-12	7.38e-12
79060432	6.43e-12	6.6e-12	8.79e-12	6.52e-12	7.15e-12
100000000

## Sheet: fig sup 1D
Distbins	ΔIgG	ΔH1	ΔIgG_2	ΔH1_2
1280	-1.53	-1.42	-1.09	-1.27
1610	-0.99	-0.8	-0.81	-1.08
2040	-0.67	-0.54	-0.61	-0.84
2580	-0.55	-0.48	-0.51	-0.67
3260	-0.52	-0.51	-0.48	-0.62
4130	-0.5	-0.49	-0.47	-0.56
5220	-0.52	-0.49	-0.49	-0.52
6610	-0.59	-0.55	-0.52	-0.57
8350	-0.62	-0.6	-0.55	-0.59
10600	-0.62	-0.58	-0.57	-0.56
13400	-0.6	-0.53	-0.56	-0.52
16900	-0.6	-0.54	-0.57	-0.54
21400	-0.59	-0.52	-0.57	-0.51
27000	-0.58	-0.5	-0.58	-0.47
34200	-0.58	-0.52	-0.58	-0.48
43300	-0.53	-0.49	-0.53	-0.47
54700	-0.54	-0.51	-0.54	-0.47
69200	-0.58	-0.57	-0.57	-0.52
87600	-0.56	-0.59	-0.57	-0.54
111000	-0.58	-0.63	-0.59	-0.56
140000	-0.61	-0.7	-0.62	-0.61
177000	-0.65	-0.79	-0.67	-0.68
224000	-0.71	-0.89	-0.72	-0.75
284000	-0.78	-0.99	-0.79	-0.83
359000	-0.86	-1.07	-0.86	-0.9
454000	-0.92	-1.14	-0.92	-0.96
574000	-0.96	-1.21	-0.96	-1.05
726000	-0.98	-1.25	-0.98	-1.09
918000	-0.99	-1.29	-1.01	-1.11
1160000	-1.01	-1.33	-1.05	-1.14
1470000	-1.05	-1.5	-1.1	-1.27
1860000	-1.12	-1.82	-1.2	-1.59
2350000	-1.24	-2.17	-1.35	-2.09
2970000	-1.45	-2.36	-1.57	-2.56
3760000	-1.71	-2.13	-1.79	-2.63
4750000	-1.97	-1.67	-1.94	-2.2
6010000	-2.08	-1.19	-1.88	-1.52
7610000	-2.01	-1.1	-1.68	-1.21
9620000	-1.77	-1.13	-1.41	-1.01
12200000	-1.28	-0.82	-1.04	-0.57
15400000	-1.04	-0.82	-0.91	-0.58
19500000	-0.91	-0.84	-0.87	-0.6
24600000	-0.71	-0.7	-0.75	-0.45
31100000	-0.63	-0.71	-0.68	-0.45
39400000	-0.47	-0.6	-0.55	-0.38
49800000	-0.39	-0.59	-0.47	-0.42
63000000	-0.23	-0.43	-0.3	-0.34
62500000	0	0	0	0
79100000	0	0	0	0

## Sheet: fig sup 2C
Distbins	ΔIgG	ΔH1	ΔH3-H4
1275.45	-1.53	-1.42	-2.77
1613.37	-0.988	-0.8	-1.99
2040.72	-0.674	-0.538	-1.2
2580.93	-0.547	-0.482	-0.71
3264.36	-0.52	-0.508	-0.547
4128.63	-0.501	-0.491	-0.399
5222.25	-0.517	-0.491	-0.321
6605.28	-0.589	-0.546	-0.328
8354.94	-0.621	-0.596	-0.397
10567.9	-0.623	-0.581	-0.368
13367	-0.601	-0.526	-0.272
16907.5	-0.598	-0.537	-0.275
21385.7	-0.589	-0.524	-0.274
27049.8	-0.58	-0.503	-0.316
34213.7	-0.581	-0.52	-0.382
43275.5	-0.533	-0.485	-0.362
54737.4	-0.542	-0.506	-0.444
69235	-0.575	-0.572	-0.605
87572.1	-0.56	-0.587	-0.676
110766	-0.583	-0.631	-0.809
140103	-0.606	-0.702	-0.994
177210	-0.651	-0.792	-1.21
224145	-0.708	-0.891	-1.44
283511	-0.776	-0.992	-1.67
358600	-0.857	-1.07	-1.85
453578	-0.916	-1.14	-1.95
573710	-0.955	-1.21	-1.92
725660	-0.975	-1.25	-1.67
917855	-0.99	-1.29	-1.32
1160954	-1.01	-1.33	-0.972
1468438	-1.05	-1.5	-0.762
1857362	-1.12	-1.82	-0.624
2349294	-1.24	-2.17	-0.535
2971517	-1.45	-2.36	-0.603
3758539	-1.71	-2.13	-0.675
4754007	-1.97	-1.67	-0.832
6013131	-2.08	-1.19	-1
7605740	-2.01	-1.1	-1.26
9620160	-1.77	-1.13	-1.44
12168110	-1.28	-0.82	-1.39
15390897	-1.04	-0.822	-1.35
19467257	-0.906	-0.836	-1.08
24623262	-0.713	-0.702	-0.9
31144861	-0.628	-0.71	-0.857
39393740	-0.473	-0.596	-0.517
49827377	-0.392	-0.593	-0.318
63024418	-0.234	-0.425	-0.11
62505519	5.66e-10	3.87e-10	6.91e-10
79060432	5.03e-10	3.44e-10	6.14e-10

## Sheet: fig sup 2B
ΔIgG	ΔH1	ΔH3-H4
0.517145	2.45522	6.50332
0.70641	2.20055	5.41746
0.556294	3.53856	6.6236
0.577069	2.55859	5.61655
1.34404	5.02576	6.39816
0.3508	3.28231	6.19703
2.1451	2.81927	7.70025
0.377553	8.05991	5.00172
0.369378	2.59785	5.66218
2.01629	4.85504	6.09569
0.422225	1.51788	6.15127
0.59107	4.64453	6.43069
2.93932	1.81537	5.2644
0.71173	4.04945	6.15829
0.498613	0.93756	6.31294
0.567921	2.7601	6.04533
0.539688	1.03091	6.95372
0.735692	1.00217	6.37439
0.359042	3.69334	6.21605
1.50438	0.598464	5.48942
0.865456	2.6219	6.65283
0.529199	2.71276	6.0669
1.49418	3.7816	5.0076
1.2179	4.19936	6.39386
1.4765	2.5182	6.00444
0.423091	1.26688	4.96688
1.37346	2.59142	5.58456
0.546866	4.25883	1.32706
0.500616	1.55251	7.36209
0.659446	2.30445	6.89251
1.69342	3.85397	5.57894
0.672317	1.47724	3.82164
0.415667	1.28387	7.25577
0.39546	4.70495	6.69543
1.13798	1.1602	7.24426
0.605448	3.32037	6.07305
0.801128	1.08632	7.0691
0.993541	1.3744	6.43377
0.650971	2.07593	6.21532
0.643507	7.07778	7.69247
1.71091	3.44455	6.93808
0.649545	5.96881	7.29032
2.26729	1.24175	7.02508
0.727509	5.29187	7.76417
0.552422	2.97469	9.02391
1.47569	1.24179	7.18098
1.52744	4.64113	7.91249
1.4075	1.69563	3.96896
0.477811	1.33171	6.70453
0.56336	2.14304	8.28521
1.18009	1.68711	6.77916
	5.79166	7.40317
	2.14904	9.31422
	1.20955	7.3064
	3.33792	6.81859
	2.46538	8.81508
	3.83973	8.75916
	4.8987
	1.75558
	4.17331
	3.84564
