# Supplementary material for: Linker histone H1.8 inhibits chromatin binding of condensins and DNA topoisomerase II to tune chromosome length and individualization
Source: eLife journal article supplement (doi:10.7554/elife.68918), 2021-08-18
Supplement: supp [file Figure 6-plot data 1.xlsx]

## Sheet: Fig 6C
								Unindividualized chromosomes (Chromosomes in masses with <4 CENP-A foci)
								ΔIgG	ΔH1	ΔCAP-G	ΔH1ΔCAP-G	ΔH1ΔCAP-D3	ΔH1ΔCAP-G ΔCAP-D3
								97.6096	94.9179	41.8344	83.1949	80.7292	43.6667
								90.3577	93.9213	41.1765	72.7575	91.3333	58.3333

## Sheet: Fig 6D
		Experiment 1							Experiment 2							Experiment 3
		ΔIgG	ΔH1	ΔCAP-G	ΔCAP-D3	ΔH1ΔCAP-G	ΔH1ΔCAP-D3		ΔIgG	ΔH1	ΔCAP-G	ΔCAP-D3	ΔH1ΔCAP-G	ΔH1ΔCAP-D3		ΔIgG	ΔH1	ΔCAP-D3	ΔH1ΔCAP-G	ΔH1ΔCAP-D3
		0.922293	4.25394	0.0974442	2.47866	0.183841	0.665678		0.848127	2.0178	0.0525473	0.601704	0.0779215	2.5861		0.783554	3.72003	4.042	0.38561	4.98817
		0.832116	6.8421	0.0965796	2.37179	0.203977	0.982423		1.32301	1.95463	0.0558129	0.991171	0.0789723	2.25699		1.07032	3.33417	1.16075	0.279861	2.95894
		2.53726	2.61888	0.0806227	0.552236	0.141794	4.00067		0.939457	2.12378	0.0820046	0.325206	0.0897806	2.13864		0.842869	5.36146	2.25281	0.205857	4.39438
		3.41144	2.30954	0.0922509	1.18212	0.243453	1.20268		1.00527	1.36413	0.0778545	0.503952	0.0954249	3.27751		0.874347	3.87665	1.44039	0.182309	2.17152
		0.77199	5.60168	0.0850996	0.44171	0.240046	0.910712		1.04744	2.21718	0.0795843	0.549222	0.0760577	1.74657		2.03643	7.61478	1.0476	0.173799	5.71852
		1.52859	2.03421	0.103495	0.604224	0.120111	0.980386		0.968411	2.49017	0.0848129	0.545035	0.105411	3.68949		0.531515	4.9732	2.67955	0.299082	2.60504
		2.06634	1.82612	0.107026	0.500311	0.140513	1.25547		0.994857	1.67048	0.0737921	0.665965	0.086097	2.90817		3.25014	4.27163	2.57275	0.160564	2.64506
		0.764863	6.1549	0.214001	0.560377	0.147425	1.14125		0.974473	2.28356	0.197048	0.581693	0.102919	2.27461		0.57205	12.212	0.933235	0.34471	6.90443
		0.835472	2.69739	0.0615855	0.68862	0.162958	1.26764		0.867081	2.14274	0.131376	0.619279	0.190326	2.18339		0.559664	3.93613	1.36055	1.98232	3.60347
		1.19554	6.98667	0.0795074	0.63735	0.228621	1.85022		1.44498	1.92823	0.0848984	0.646122	0.0811801	0.99149		3.05498	7.35613	1.30772	0.391502	4.89393
		0.680277	3.50838	0.0994141	2.22268	0.163807	0.947981		1.1525	2.15304	0.0950624	0.768848	0.0676767	1.35293		0.639736	2.29982	3.34843	0.158246	2.80678
		1.02354	3.62106	0.100019	0.745953	0.176916	0.536959		0.410025	2.07548	0.0855035	0.456436	0.0734596	2.67822		0.89556	7.03716	1.14565	0.408589	2.87262
		2.62279	1.25252	0.0916695	2.73884	0.161165	0.879228		0.942476	2.04738	0.11809	0.531681	0.279674	2.13558		4.45352	2.75056	3.14856	0.237481	8.48238
		1.23818	2.73008	0.0599022	0.495712	0.552764	1.36506		1.01052	1.75075	0.283513	1.33782	0.0454018	2.04831		1.07838	6.13553	2.18689	0.278792	2.70243
		3.31794	1.58055	0.0808799	0.570265	0.294199	1.2638		0.918744	1.94815	0.0559746	0.268564	0.0767945	2.24445		0.755475	1.42054	1.39529	0.168805	4.75289
		0.922641	4.67985	0.070377	2.46706	0.275094	1.23328		1.18659	2.10803	0.0619885	0.590935	0.0749885	2.4487		0.860487	4.18197	1.13802	0.289701	2.76499
		1.44058	3.71948	0.129741	0.684755	0.197013	0.598593		1.03211	2.2561	0.064873	0.502771	0.137928	1.879		0.817709	1.56199	1.11271	0.431814	3.46517
		0.631828	3.10726	0.0981903	0.525609	0.18499	1.80936		0.867577	2.11534	0.0888152	0.353455	0.0674088	2.13649		1.11468	1.51844	1.63471	0.15606	2.53971
		1.14114	1.38804	0.0797777	2.52092	0.151126	1.28911		1.11748	1.97683	0.0582771	0.795903	0.0929654	3.53558		0.544003	5.59597	2.85352	0.184114	7.24858
		1.16582	1.5207	0.211114	0.611531	0.18821	1.43905		1.03571	2.10667	0.0584388		0.077552	1.9751		2.27936	0.906763	2.31687	0.165239	5.38327
		3.34585	1.48241	0.0785033	1.02119	0.208249	1.25881									1.3113	3.97258	0.640558	0.230355	6.19082
		2.31117	1.4662	0.313001	0.495484	0.144161	1.2187									0.801816	4.11024	1.05085	0.186965	2.87623
		0.606328	1.41932	0.0699699	0.720517	0.201022	1.31025									2.26391	5.7297	1.93244	0.180339	4.15235
		0.976645	1.63274	0.078845	0.582379	0.1844	1.52161									1.8453	6.36267	1.09697	0.316198	6.27323
		0.798593	1.52764	0.0813665	0.572379	0.169138	1.63013									2.23712	3.81545	1.04946	0.385817	2.84445
		1.09829	1.36085	0.071797	0.549779	0.31949	1.22532									0.641046	1.91952	2.09493	0.174219	4.55031
		0.497688	3.79579	0.0505877	0.896668	0.151274	1.16721									2.081	3.92639	3.14873	0.244876	2.70024
		0.432433	1.87953	0.0944338	0.514096	0.293696	1.23861									0.828585	6.45278	1.18204	0.190632	4.6847
		0.832288	3.45034	0.102148	0.591981	0.239777	1.14568									0.75851	2.35228	0.876965	0.326836	2.54462
		0.427273	2.20446	0.087548	1.89391	0.152692	1.3122									0.999161	3.49159	1.77878	0.174878	2.93409
			2.4157	0.269487	0.468498	0.165956	1.54997									2.56579	5.83934	2.10336	0.304789	4.82258
						0.138752	1.08015									1.01866	2.23824	2.95339	0.267894	8.00044
																0.629798	1.94526	2.63416		6.61768
																0.599181	7.12871	1.20387		5.55516
																1.72422	1.75788	1.89596		3.99558
																0.917345	5.03086	1.39518		3.24543
																1.21383	1.64595	2.04084		2.45892
																1.50537	2.08242	1.26152		2.9897
																0.98632	3.14535	1.24689		6.27366
																0.975011	10.7239	1.43095		3.21405
																2.59229	5.21901	3.77473		2.4032
																0.984159	9.04366	2.28771		2.80657
																3.43529	1.88144	1.11942		3.25635
																1.10229	8.01798	3.16878		4.79008
																0.837003	4.50711	3.43207		3.3695
																2.2359	1.88149	2.15683		3.64921
																2.3143	7.03202	1.45307		5.08239
																2.13258	2.56914	1.29982		4.9727
																0.723957	2.01775	1.09376		2.4098
																0.853576	3.24704	1.04646		6.93127
																1.78802	2.55622	1.02713		2.92119
																	8.77524	0.84218		2.11446
																	3.25612	1.35825		2.80622
																	1.83266			2.93194
																	5.05745			2.25977
																	3.73542			2.63645
																	5.81778			3.67584
																	7.42228			2.67647
																	2.65998			2.25131
																	6.3232			3.96773
																	5.82672			2.51406

## Sheet: Fig 6E
		Experiment 1								Experiment 2
		ΔIgG	ΔH1	ΔCAP-G	ΔCAP-D3	ΔH1ΔCAP-G	ΔH1ΔCAP-D3			ΔIgG	ΔH1	ΔCAP-G	ΔCAP-D3	ΔH1ΔCAP-G	ΔH1ΔCAP-D3
		0.701316	1.6616	0.509806	0.337816	9.11639	0.951796			1.18938	4.97233	2.13769	1.3152	8.52908	1.56809
		1.99407	2.12096	2.33032	0.992	13.5619	0.629466			0.882572	16.9253	4.65594	0.192476	3.99776	0.898028
		2.31186	7.49174	3.44332	0.228539	3.17313	2.21794			1.12507	4.13757	0.764367	1.4763	12.4855	2.79603
		1.51157	0.867883	0.613854	0.217519	6.41007	0.978248			0.872867	6.15079	0.654434	0.440745	5.07604	4.05067
		1.59752	3.96471	5.8514	0.132335	7.43671	0.370291			0.840189	3.43253	1.43784	1.41354	2.82593	1.08689
		1.91821	3.32092	1.24561	0.458214	8.2273	0.513529			0.940663	1.62334	0.685278	0.271974	4.23083	0.660443
		1.77016	7.78456	0.994869	0.443427	12.8114	0.812413			0.961646	3.18612	3.39685	0.665403	3.28692	3.0525
		0.751218	4.0567	1.51226	0.642631	13.4076	0.103083			0.84898	0.794272	2.87911	0.177286	15.933	7.18383
		1.01418	1.55467	1.54933	0.808937	4.51873	0.626777			1.56069	11.1203	1.52118	0.572417	5.6328	2.82575
		0.728961	2.55503	4.6789	1.11064	8.05216	0.501019			0.952401	19.3713	3.59575	0.103752	2.47782	1.29818
		0.608369	7.15686	1.69463	0.478927	2.46262	0.204728			0.737269	2.27285	2.78774	0.605196	3.94458	1.47012
		0.664893	2.37198	2.9643	1.86335	7.2552	1.05279			1.65168	8.64029	2.29749	0.160124	5.54162	1.20364
		0.795519	7.71582	1.46606	0.256214	7.54966	0.727			0.907341	5.14243	2.22769	0.220728	4.8661	1.42124
		1.35111	6.08114	1.80734	0.910621	1.82534	0.631816			0.421969	9.42125	4.82068	1.21446	12.2649	1.81368
		0.936296	5.68534	0.593039	0.192141	4.57079	0.689699			1.0386	2.72279	1.47716	0.51269	6.95298	2.08288
		0.198233	6.18547	3.57216	1.38361	4.30644	1.25166			2.07392	8.4043	1.10493	1.55187	2.94489	0.663872
		0.91435	6.61629	8.34505	1.13794	4.44285	0.817549			1.74383	3.46455	4.70717	1.59349	6.89983	3.64196
		1.82493	5.69606	0.841621	0.519019	3.70357	1.96371			1.13597	20.927	2.81957	0.254577	2.81437	0.852639
		1.66711	3.14938	1.14752	0.757252	6.4037	0.401553			1.66118	3.77796	1.55577	0.135775	3.40608	2.281
		0.125083	0.975282	1.47254	0.368335	7.05155	0.572709			2.23965	2.79822	1.20903	0.273767	6.27568	0.655904
		1.7665	4.46245	1.52205	0.404646	2.74582	1.12747				3.00986			11.019	0.480307
		1.16408	4.31684	1.08956	0.296359	3.68293	0.352675
		0.474796	1.26171	1.25542	0.379971	6.46897	0.431573
		1.78517	1.101	2.22758	0.249825	5.9045	1.43796
		0.468019	2.47475	2.15169	0.349762	4.40906	2.06094
		1.80443	1.63028	1.16542	0.0934854	7.44685	0.564306
		0.982699	3.04041	1.05604	0.530607	7.20123	0.481369
		0.812777	6.60825	1.85604	0.559	11.0537	0.87251
		1.06824	3.73907	1.5453	0.175854	2.27649	0.497587
		0.732612	5.41639	1.28152	0.452947	9.03272
				1.60478	0.484117	11.1421
				1.48017	0.424825
				1.91181	0.189762
				0.518699

## Sheet: fig sup 1A
					Number of chromosomes in clump	ΔIgG	ΔH1	ΔCAP-G	ΔH1ΔCAP-G	ΔH1ΔCAP-D3	ΔH1ΔCAP-G ΔCAP-D3	ΔCAP-D3
					0	4.58	8.6	9.62	4.28	36.07	8.67	34.47
					1	86.06	77.33	15.44	60.83	33.4	19.67	53.04
					2	6.97	8.99	16.78	18.08	11.26	15.33	5.12
					3	1.79	2.5	13.65	8.82	6.71	14	1.6
					4	0	0.78	10.29	3.13	3.97	8	1.17
					5	0.4	0.39	6.71	1.92	2.93	5.33	0.21
					6	0.2	0.16	6.49	0.96	1.37	4.33	0.75
					7	0	0.16	5.59	0.51	1.82	3	0.43
					8+	0	1.09	15.44	1.47	2.47	21.67	3.2

## Sheet: fig sup 1B
					ΔIgG	ΔH1	ΔCAP-G	ΔCAP-D3	ΔH1ΔCAP-G	ΔH1ΔCAP-D3	ΔH1ΔCAP-G ΔCAP-D3
					48.1086	57.3998	5.40284	57.2626	21.6837	50.4149	12.3214
					80.1056	64.4197	5.85774		37.2987	36.8694	5.50518

## Sheet: fig sup 1D
						Individual			Individualized clump			Unindividualized clump
						Exp 1	Exp 2	Exp 3	Exp 1	Exp 2	Exp 3	Exp 1	Exp 2	Exp 3
					ΔIgG	90	82.8125	86.1	4	9.375	3.98	6	7.8125	9.95
					ΔH1	95.5	87.4074	87.9	3	3.7037	3.13	1.5	8.88889	8.95
					Δcond I	0	0	0	0	0		100	100	100
					ΔH1 Δcond I	86.2	85.0746	82.47	1.7	2.98508	0.515	12.1	11.9403	17.01
