# Supplementary material for: Linker histone H1.8 inhibits chromatin binding of condensins and DNA topoisomerase II to tune chromosome length and individualization
Source: eLife journal article supplement (doi:10.7554/elife.68918), 2021-08-18
Supplement: supp [file Figure 7-plot data 1.xlsx]

## Sheet: Fig 7B
				ΔIgG		ΔH1
				100	25	100	25
				1.2944	0.413988	1.78014	0.679652
				1.01951	0.284645	2.26767	0.624077
				1.75675	0.235594	2.30156	0.926408
				0.768778	0.246661	1.67428	0.672248
				0.991963	0.228931	1.66645	1.17856
				1.15088	0.309312	2.39457	0.587825
				1.08637	0.455058	2.05305	0.756522
				1.02273	0.430211	2.24463	0.969729
				0.78963	0.409829	1.91929	2.32597
				0.782767	0.321543	2.1166	0.727704
				0.709114	0.243072	2.05307	0.75456
				0.59732	0.335422	1.51066	0.895206
				0.962532	0.235407	2.0331	1.02154
				1.33882	0.381855	1.7737	0.977567
				1.22327	0.343369	3.9909	0.912853
				1.28607	0.219647	2.29556	0.91029
				1.07263	0.320136	1.82716	2.14853
				1.11765	0.341802	1.63047	1.1072
				1.02869	0.343215	2.801	0.752327
				1.02064	0.430739	2.11216	0.614215
				0.771061	0.355236	2.3007	0.837233
				0.915721	0.413278	1.94121	0.737385
				1.07639	0.306493	1.7116	0.85018
				1.16538	0.385629	1.75426	0.936013
				0.944644	0.341466	1.89316	1.0028
				1.88793	0.379945	1.95402	1.1302
				1.03447	0.382711	2.18761	1.03271
				0.899892	0.309886	2.27751	1.00205
				1.07293	0.336066	2.92269	0.942324
				0.869603	0.347836	1.62807	0.864456
				0.877387	0.355773	2.9013	0.791897
					0.385885	1.96219	0.706157
					0.352615

## Sheet: Fig 7C
				ΔIgG		ΔH1
				100	25	100	25
				7.8125	20.9039	8.88889	5.34759
				9.95025	27.7419	8.94855	15.0862
				6.84931	25.6944	14.9039	12.8655

## Sheet: Fig 7E
				Experiment 1					Experiment 2					Experiment 3					Experiment 4
				ΔIgG	ΔH1	ΔCAP-G	ΔH1ΔCAP-G		ΔIgG	ΔH1	ΔCAP-G	ΔH1ΔCAP-G		ΔIgG	ΔH1	ΔCAP-G	ΔH1ΔCAP-G		ΔIgG	ΔH1	ΔCAP-G	ΔH1ΔCAP-G
			1	11.395	34.777	8.868	37.876		0.972617	9.14414	1.24087	3.29875		0.858167	1.65045	1.17263	2.88706		1.30527	3.98362	1.01581	4.3386
			2	8.295	40.339	8.802	13.05		0.875166	18.0473	1.49693	2.5051		1.02696	1.369	1.04078	1.56561		0.950172	4.62073	1.00825	1.49485
			3	9.35	58.078	9.057	26.712		0.862958	39.7713	1.30596	2.94946		0.759433	3.27679	0.678711	4.25393		1.07102	6.65269	1.03746	3.05979
			4	5.818	16.529	10.253	39.185		0.968802	6.57712	1.58202	51.0414		0.725257	3.4911	55.3902	3.53888		0.666438	1.89336	1.17446	4.48855
			5	8.545	22.808	10.386	25.203		2.87394	16.6622	1.70473	8.59909		0.641443	3.21425	1.31229	5.19854		0.978809	2.6126	1.18969	2.88694
			6	8.898	37.452	8.453	32.111		0.863536	17.8161	2.05514	60.6195		1.03616	3.2084	0.703864	3.01906		1.01924	4.29003	0.96827	3.67824
			7	8.732	91.579	12.019	29.86		0.883318	46.7244	1.03336	7.22186		1.22595	5.31933	0.906589	1.9083		1.00023	10.4901	1.37675	3.42039
			8	11.028	87.329	11.948	29.594		1.02255	19.5026	2.6026	7.18543		0.723144	2.53581	1.32265	3.90236		1.26323	10.0033	1.36861	3.38992
			9	15.298	34.77	11.972	37.519		0.980323	8.45787	1.55944	9.37469		0.99144	3.29204	1.03419	2.78436		1.75235	3.98282	1.37136	4.29771
			10	14.474	397.355	11.474	38.013		1.12336	12.3187	1.52642	11.8459		0.975958	2.58521	0.131007	2.16891		1.65796	45.516	1.31432	4.3543
			11	19.839	63.215	9.772	30.263		0.979397	12.1414	2.23395	8.43957		0.911239	5.08476	5.37482	2.38206		2.27251	7.24112	1.11936	3.46655
			12	10.682	30.348	10.423	29.822		1.45631	6.70669	2.91525	13.6761		0.999603	4.37692	1.42117	1.795		1.2236	3.47629	1.19393	3.41604
			13	7.407	388.218	7.516	39.488		1.03979	21.0413	2.1105	9.43185		1.00061	2.83537	0.950702	3.25625		0.848454	44.4694	0.860939	4.52325
			14	8.461	47.292	7.692	28.433		1.25916	11.5749	1.07834	9.72926		1.0008	2.39904	1.10321	1.42536		0.969187	5.41718	0.8811	3.25693
			15	10.848	105.79	8.778	34.188		1.01748	15.4923	1.49833	8.60975		0.782417	1.67394	1.31209			1.24261	12.118	1.0055	3.91615
			16	8.333	63.59	92.027	9.558		0.896126	26.3497	2.5497	25.6479			3.4423	2.47105			0.954525	7.28408	10.5415	1.09485
			17	8.787	162.733	8.37	24.492		0.999899	16.2654	3.2949	5.17676			3.46458	1.56935			1.00653	18.6407	0.958763	2.8055
			18	9.093	74.783	9.218	16.717		2.06901	14.9617	1.91925	35.5135			1.09954	1.35436			1.04158	8.56621	1.0559	1.91489
			19	10.845	89.345	9.499	30.503		1.58357	10.6386	1.25023	5.92941			1.74901	0.799605			1.24227	10.2342	1.08809	3.49404
			20	8.586	207.584	8.29	18.465		0.848784	16.5551	2.10011	5.35671			2.5073				0.983505	23.7782	0.949599	2.11512
			21	7.667	116.985	9.632	35.596		0.999589	16.3448	2.20615	4.35111			2.76299				0.878236	13.4003	1.10332	4.07743
			22	8.448	531.417	8.027	13.498		0.753344	14.1974	1.85596	3.41622			2.78469				0.967698	60.8725	0.919473	1.54616
			23	7.501	76.06	8.72	30.602		0.903234	15.7749		3.58874			4.29311				0.859221	8.71249	0.998855	3.50538
			24	8.509	51.693	6.903	17.392		1.03687	23.2197		6.94008							0.974685	5.92131	0.790722	1.99221
			25	9.17	35.802	8.188	65.38		1.05062	27.3898		2.77591							1.0504	4.10103	0.937915	7.48912
			26	13.02	45.1	7.284	30.97		0.838012	10.535		3.84077							1.49141	5.16609	0.834364	3.54754
			27	8.158	45.309	9.124	43.383		1.47028	36.7634		4.21028							0.934479	5.19003	1.04513	4.96942
			28	8.73	101.632	9.573	110.257		1.65252	9.87695		3.80566							1	11.6417	1.09656	12.6297
			29	8.655	85.568	8.327	40.895		0.844417	27.0495		2.87251							0.991409	9.8016	0.953837	4.68442
			30	8.128	393.262	11.469	15.52		0.80421	15.5981		4.75879							0.931042	45.0472	1.31375	1.77778
			31	7.582	27.647	7.945	11.768		1.06109	20.8871		3.27001							0.868499	3.1669	0.91008	1.348
			32		136.654	43.507	32.772			15.8258										15.6534	4.98362	3.75395
			33		35.412		39.535			23.0052										4.05636		4.52864
			34				48.934			18.5216												5.60527
			35				18.8			42.3536												2.15349
			36							27.6167
			37							8.34017
			38							12.4347
			39							16.4292
			40							11.4099
			41							7.22383
			42							14.0474

## Sheet: Fig 7F
			Experiment 1					Experiment 2					Experiment 3					Experiment 4
			ΔIgG	ΔH1	ΔCAP-G	ΔH1ΔCAP-G		ΔIgG	ΔH1	ΔCAP-G	ΔH1ΔCAP-G		ΔIgG	ΔH1	ΔCAP-G	ΔH1ΔCAP-G		ΔIgG	ΔH1	ΔCAP-G	ΔH1ΔCAP-G
			1.10399	1.13645	1.00554	2.26225		0.517576	3.99941	0.675425	0.793595		0.923125	8.43827	1.69616	2.23228		0.540767	3.39653	0.412928	1.47128
			1.02307	2.15802	0.495527	2.54581		1.48664	3.8378	1.09239	1.09769		1.00531	5.02485	1.44251	2.46781		0.77859	4.16876	0.741653	1.60405
			0.962767	1.89954	0.44919	4.49215		0.562732	3.40379	2.27261	1.72955		1.15679	3.31751	1.74336	4.27383		1.22209	2.17332	0.407875	1.01765
			0.976956	1.91159	0.786331	2.89722		0.965669	3.78153	2.17472	2.33646		0.869806	7.19987	0.775398	2.11308		1.49327	1.72414	0.412209	2.49796
			0.499925	2.34766	0.393661	1.77782		1.10411	2.88231	1.09606	2.33015		1.03398	4.35502	1.55076	2.77697		0.874348	5.36737	0.507051	2.79962
			1.41443	1.70253	0.408253	1.57593		1.92698	3.31595	1.4139	1.89768		0.901034	3.90515	1.30692	2.52352		1.64312	1.63041	0.525447	1.10218
				1.66664	0.944317	2.19508		1.06317	3.6011	0.604159	2.13244		1.04704	4.02282	1.53498	5.26964		1.92509	1.56905	0.958258	1.09615
					0.513096	2.01466		2.58465	2.85855	1.9345	1.77		0.994695	4.02142	1.51444	2.45322		0.523178	3.10612	1.87427	1.34216
					0.890601			0.984136	3.69051	0.476339	0.996691		1.57852	3.73168	1.56491	4.71381		0.53664	2.79381	0.521814	1.36204
					1.27949			0.664659	3.11843	1.55059	1.54885		0.893022	6.53524	1.89496	3.14432		0.840548	4.30229	0.609809	2.09036
								1.61472	2.97499	0.869988	3.15689		1.37982	4.20408	1.52363	3.04699		0.575651	3.23264	0.501791	1.56713
								0.749648	3.1267	0.862715	1.31291		1.39059	4.68893	4.87878	6.53977		1.49979	1.96617	0.518462	1.94026
								0.729814	3.7356	0.783692	2.05212		1.41681	4.41169	2.42807	7.67468		1.56202	1.5332	0.512195	1.75814
								1.14973	3.06849	0.595743	0.910541		1.3184	3.6718	1.45041	7.34393		1.66074	2.11142	0.25084	1.82441
								0.930773	3.81649	0.798234	1.60007		1.13058	4.39452	1.74254	6.09194		1.71379	1.44815	0.469261	2.5388
								1.01555	3.86936	0.857097	0.9057		0.815148	7.2102	1.61433	11.8228		0.788046	2.38783	0.385387	2.88505
													3.16328	3.93948	2.52778	4.56294		1.27403	2.08264	0.496315	1.59613
													0.6277	3.95021	2.07991	4.78532		0.340504	2.53394	0.766294	1.91676
													0.941154	3.85669	1.47627	3.87156		0.956749	1.21257	0.445976	1.35532
													1.20915	3.67965	3.62523	3.8798		1.28649	1.40449	1.59282	1.6321
													1.12017	3.52683	2.4646	3.8253		1.47524	1.35842	0.333434	1.57865
													1.00686	4.35219	0.713986	4.12926		1.72541	1.34323	2.86597	1.25777
													0.953132	4.03577		3.39706		0.567145	1.14122	0.41975	1.16718
													0.917133	4.54182		2.38983		1.05246	1.30142	0.409127	1.93624
													0.843421	4.54356		3.31645		1.04335	1.3364	0.461582	1.42212
													0.829086	3.43193		3.60775		1.18453	1.24036	0.323974	1.47642
													1.36288	7.14029		3.62803		0.870723	4.31613	0.362369	1.34863
													0.885744	3.77505		2.69363		0.292465	2.08428	0.545179	1.75005
													0.908452	4.00879		3.39917		0.88143	3.21181	0.562321	2.50964
													0.8039	2.90749				0.23764	2.01917	0.510157	1.71332
																			2.3049	1.93463	1.39515
																					1.04587

## Sheet: Fig 7H
				ΔIgG		ΔH1		ΔH1ΔCAP-G
				100	25	100	25	100	25
			1	11.395	14.333	34.777	26.584	37.876	13.863
			2	8.295	26.302	40.339	32.973	13.05	29.766
			3	9.35	6.634	58.078	143.532	26.712	11.143
			4	5.818	9.657	16.529	47.201	39.185	23.694
			5	8.545	28.754	22.808	473.433	25.203	10.252
			6	8.898	8.102	37.452	230.709	32.111	9.551
			7	8.732	8.693	91.579	423.622	29.86	13.234
			8	11.028	18.273	87.329	34.854	29.594	24.434
			9	15.298	12.41	34.77	35.201	37.519	13.135
			10	14.474	13.227	397.355	45	38.013	10.409
			11	19.839	9.546	63.215	420.947	30.263	33.358
			12	10.682	7.055	30.348	47.321	29.822	9.347
			13	7.407	10.553	388.218	34.817	39.488	9.117
			14	8.461	7.225	47.292	36.569	28.433	76.135
			15	10.848	14.148	105.79	43.982	34.188	12.37
			16	8.333	44.635	63.59	43.157	9.558	26.063
			17	8.787	17.261	162.733	46.682	24.492	9.037
			18	9.093	18.631	74.783	70.149	16.717	13.018
			19	10.845	31.097	89.345	42.316	30.503	9.846
			20	8.586	35.352	207.584	60.913	18.465	13.348
			21	7.667	9.685	116.985	36.99	35.596	14.292
			22	8.448	13.958	531.417	33.601	13.498	5
			23	7.501	12.939	76.06	99.982	30.602	24.632
			24	8.509	9.509	51.693	39.133	17.392	33.443
			25	9.17	7.595	35.802	52.915	65.38	10.858
			26	13.02	7.891	45.1	93.734	30.97	19.032
			27	8.158	7.969	45.309	106.288	43.383	12.639
			28	8.73	8.156	101.632	117.85	110.257	12.666
			29	8.655	5.919	85.568	198.244	40.895	49.142
			30	8.128	7.188	393.262	50.427	15.52
			31	7.582	11.622	27.647	58.541	11.768
			32		10.338	136.654	189.543	32.772
			33		8.835	35.412	56.62	39.535
			34		7.137		641.306	48.934
			35		11.815		108.711	18.8
			36				129.615
			37				63.266
			38				64.302
			39				75.985
			40				163.895

## Sheet: fig sup7C
			Experiment 1								Experiment 2									Experiment 3
			ΔIgG	ΔH1	Δcond II	ΔH1Δcond I	ΔH1Δcond II	Δcond IΔcond II	ΔH1Δcond IΔcond II		ΔIgG	ΔH1	Δcond I	Δcond II	ΔH1Δcond I	ΔH1Δcond II	Δcond IΔcond II	ΔH1Δcond IΔcond II			ΔIgG	ΔH1	Δcond I	ΔH1Δcond I	Δcond IΔcond II	ΔH1Δcond IΔcond II
		1	0.725993	7.54007	2.86332	5.83732	8.80341	2.72224	11.2016		0.540767	3.39653	0.412928	1.80838	1.47128	0.296074	0.324885	4.63122			0.530956	4.10279	0.692901	0.98215	0.814116	0.727821
		2	0.918439	10.0446	1.34076	3.36503	3.29334	0.946594	13.0664		0.77859	4.16876	0.741653	1.41601	1.60405	0.981847	1.11394	1.84984			0.577279	3.93701	1.12064	3.79438	1.12606	0.30357
		3	0.777845	12.301	1.43193	2.4921	6.22157	0.843692	10.778		1.22209	2.17332	0.407875	0.329739	1.01765	1.55535	0.280077	1.72774			0.990633	3.49179	2.33135	1.27271	1.77427	0.252688
		4	0.814158	10.564	1.28168	1.68277	2.74458	0.970835	2.91451		1.49327	1.72414	0.412209	0.542158	2.49796	1.17544	0.337472	2.25462			1.13265	3.87928	2.23094	0.82343	2.39684	0.259417
		5	1.67381	13.0574	1.18522	2.04109	4.03811	2.09956	14.7264		0.874348	5.36737	0.507051	0.256988	2.79962	1.07675	0.185752	4.57618			1.09066	2.95683	1.12437	1.90263	2.3904	0.628355
		6	1.02735	12.0762	1.79508	5.10769	2.78164	1.68462	9.09359		1.64312	1.63041	0.525447	0.422104	1.10218	1.30595	0.243616	1.80776			1.00958	3.40168	1.45043	1.03476	1.94674	0.532991
		7	1.05571	12.9792	2.42155	1.82915	3.1693	0.9414	12.5137		1.92509	1.56905	0.958258	0.322443	1.09615	1.19544	0.888745	1.71997			0.769027	3.69421	0.619778	0.854452	2.18757	0.457243
		8	0.910605	15.9732	0.726449	6.05429	9.60468	2.76068	6.70281		0.523178	3.10612	1.87427	0.460919	1.34216	0.937403	0.307589	2.02566			1.04181	2.93246	1.98449	0.767706	1.81576	2.02327
		9	1.20158	8.12671	1.51825	1.62433	3.90634	1.10356	7.59124		0.53664	2.79381	0.521814	0.505929	1.36204	0.999227	0.175536	1.57265				3.78593	0.488634	1.26582	1.02245	0.742552
		10	2.29306	15.4221	1.26212	7.77266	5.10584	0.673058	1.8307		0.840548	4.30229	0.609809	0.440933	2.09036	1.57111	0.20631	2.32956				3.19906	1.59068	1.13028	1.58888	0.569142
		11	0.884101	5.45579	3.16011	2.09251	3.8327	2.58134	2.49881		0.575651	3.23264	0.501791	1.24914	1.56713	0.721756	0.27606	1.85393				3.05191	0.892491	0.630529	3.23849	0.497128
		12	0.987094	13.01	1.20639	6.61898	3.20629	2.1011	3.92266		1.49979	1.96618	0.518462	0.61761	1.94026	1.2401	0.27326	2.33692				3.20751	0.885023	0.748297	1.34686	0.613377
		13	5.09198	7.0733	2.57453	2.80122	9.34537	2.28151	5.88101		1.56202	1.5332	0.512195	1.46907	1.75815	0.425684	0.382185	1.80232				3.83217	0.803939	1.00747	2.10517	0.512064
		14	1.15088	9.71533	2.85505	5.13358	3.26166	1.54359	9.57703		1.66074	2.11142	0.25084	0.242673	1.82441	1.08829	0.437844	3.39207				3.1478	0.611161	2.11777	0.934099	1.26405
		15	0.999929	2.5327	1.47554	2.14163	3.53251	0.680777	3.90712		1.71379	1.44815	0.469261	0.352922	2.5388	1.40456	0.428493	1.61312				3.91514	0.818876	0.39245	1.64144	1.79606
		16	0.894062	9.90193	1.16303	4.60897	3.36672	0.592154	9.62822		0.788046	2.38783	0.385387	2.16115	2.88504	1.0858	0.227235	4.81069				3.96939	0.879237	0.475749	0.929093
		17	0.854474	2.75032	1.06049	7.79703	4.0454	2.95056	7.02903		1.27403	2.08264	0.496315	0.357295	1.59613	1.32264	0.591684	1.92288
		18	1.7209	3.3578	1.49805	1.979	3.49885	1.03782	3.88106		0.340504	2.53394	0.766294	0.390637	1.91676	2.02813	0.424521	2.45591
		19	0.954542	9.86363	3.08289	2.47576	6.86144	1.29238	4.90209		0.956749	1.21257	0.445976	1.21273	1.35532	1.15753	0.244659	1.67017
		20	1.83974	2.89985	2.32145	2.12406	7.28549	3.25796	7.94105		1.28649	1.40448	1.59282	0.344879	1.6321	1.87412	0.577565	3.44414
		21	1.24078	7.89976	0.4292	3.2164	3.29918	2.37492	0.378332		1.47524	1.35842	0.333434	0.542317	1.57865	1.07818	0.300102	1.87575
		22	0.882886	7.34254	0.981448	2.12015	3.2153	2.37418	8.76161		1.72541	1.34323	2.86597	0.314682	1.25777	1.03889	0.220106	2.02542
		23	2.15462	4.89545	1.87461	2.41809	7.80849	2.57383	10.3305		0.567145	1.14122	0.41975	0.446178	1.16718	1.50578	0.26286	2.08826
		24	1.58635	6.70591	0.990299	5.77776	4.1235	2.6287	2.50329		1.05246	1.30142	0.409127	0.384091	1.93624	1.53686	0.263421	1.74267
		25	2.96056	1.24928	0.834792	6.33677	3.58828	1.045	6.8517		1.04335	1.3364	0.461582	0.296341	1.42212	1.37911	1.05791	1.52325
		26	0.823165	2.94141	1.38225	2.02821	4.2459	5.64283	5.85629		1.18453	1.24036	0.323974	0.381133	1.47642	1.02535	0.429718	1.67243
		27	2.27885	7.54082	2.43858	3.44039	3.04009	2.49744	3.4651		0.870723	4.31613	0.362369	0.521464	1.34863	1.2181	0.389549	1.45871
		28	0.759629	8.9678	0.985898	1.95173	6.2901	3.42954	7.22703		0.292465	2.08428	0.545179	0.321156	1.75005	1.09647	0.253225	2.09
		29	0.855934	3.94885	1.0727	5.51948	3.12412	1.23992	9.40968		0.88143	3.21182	0.562321	0.353454	2.50964	0.889776	0.26901	1.61045
		30	0.932996	4.15487	1.50691	2.00537	3.61626	2.06431	2.85265		0.23764	2.01917	0.510157	0.932869	1.71332	0.882342	0.415679	2.37026
		31	3.74763	7.85154	1.64546	3.21902	3.20636	1.01436	1.47481			2.3049	1.93463	0.321014	1.39515	1.8895	0.540613	1.92206
		32	0.990139	3.68805	2.35309	3.77924	4.93366	0.904374	3.57869						1.04587	1.08773	0.278887	2.31724
		33	0.986108	3.21372	1.80922		4.14066	1.80731	4.6191									2.39391
		34	0.891088	7.09066	0.871344		3.77951	1.15244	7.32893
		35	1.61835	5.00261	1.46898		6.31072	2.48946	5.01121
		36	1.08031	4.06138	0.923987		4.05077	1.33849	4.7179
		37	1.22392	4.24558	2.29133		3.0432	1.03891	3.25603
		38	1.87134	5.52459	0.891118		3.84979	1.4087	7.56878
		39	0.80717	5.77362	1.06681		8.38905	1.61969	3.75061
		40	0.862464	12.3987	1.0825		3.71698	5.1333	7.48489
		41	2.17897	9.47672	3.6711		2.92812	1.24875	5.38775
		42	0.840337	9.83935	1.69208		3.82561	0.914371	6.23648
		43	2.27777	6.96775	0.688626		3.44036	0.917339	4.09303
		44	0.992746	6.90985	4.4073		4.66545	1.7933	9.69035
		45	0.209154	9.10508	2.21578		4.39919	0.927712	10.3986
		46	4.06301	3.63871	1.28982		4.22264	4.86064	9.25372
		47	2.24368	10.0926	0.997282		7.0267	1.08586	7.73726
		48	2.94431	9.06407	0.856784		7.04257	0.807332	7.47946
		49	0.565265	5.20182	0.816207		3.50686	1.69353	3.40471
		50	0.688144	4.82104	0.971719		6.0912	1.6069	8.86106
		51	1.67442	4.55904	1.01786		3.35107	1.22925	9.51404
		52		9.99975	0.695624		3.45259	1.50741
		53		5.5039	1.22257		4.20642	1.04314
		54		4.78776			5.17189	0.88823
		55		7.89473			2.85563	2.81586
		56		9.82785			3.1539	3.09019
		57		9.68016			3.96416	3.3141
		58		7.86244			4.17643	1.09234
		59		6.92834			3.1053	1.02441
		60		17.5381			5.55266	2.74192
		61		4.72782			3.17663	0.836619
		62						1.60068
		63						0.899674
		64						1.24679
