# Supplementary figures and images for: Linker histone H1.8 inhibits chromatin binding of condensins and DNA topoisomerase II to tune chromosome length and individualization
Source: eLife journal article supplement (doi:10.7554/elife.68918), 2021-08-18

Figure 7-figure supplement 1A

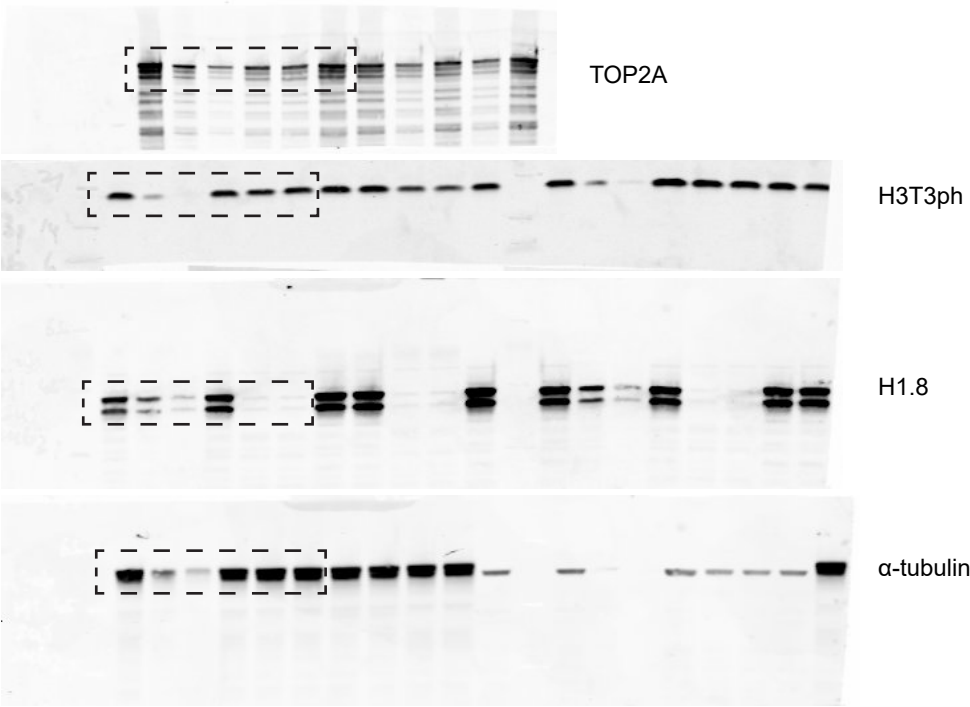

Supplement: supp [file elife-68918-supp-v1.zip]

**Figure 3B**

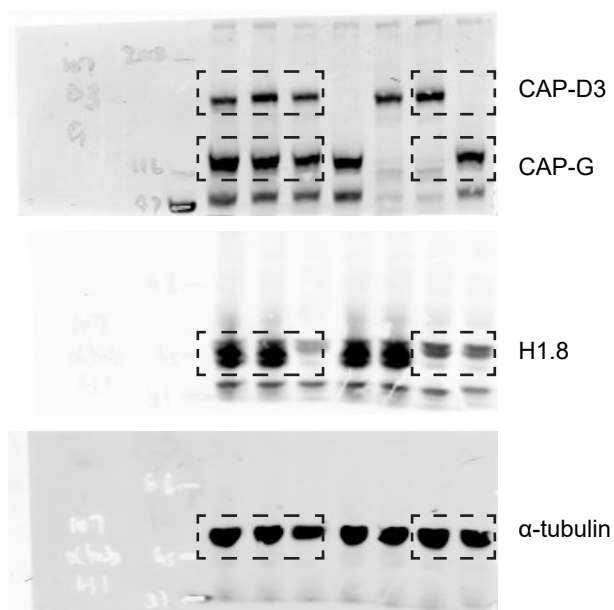

**Figure 3-figure supplement 1B**

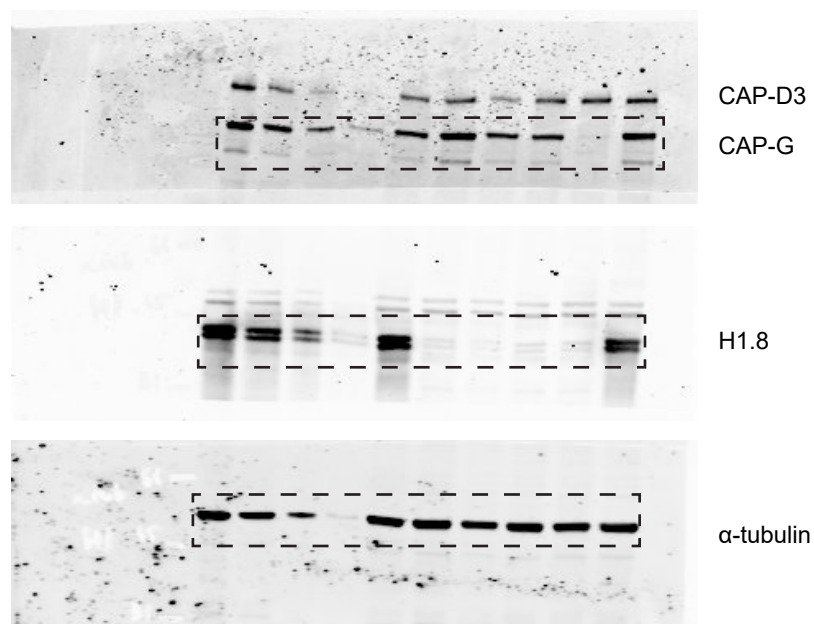

Supplement: supp [file elife-68918-supp-v1.zip]

**Figure 1B**

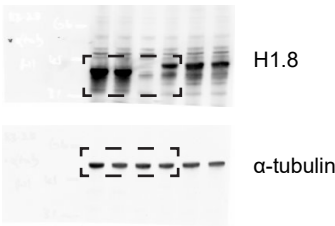

**Figure 1E (CAP-G)**

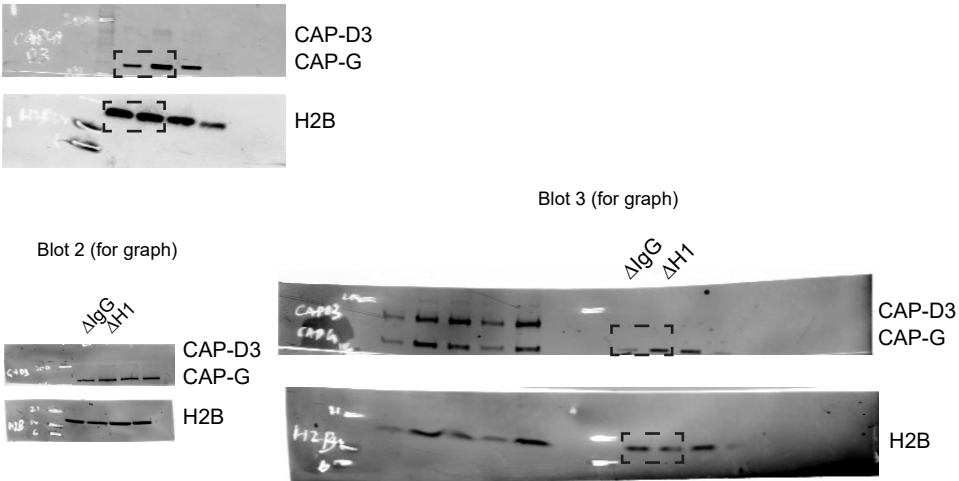

**Figure 1E (TOP2A)**

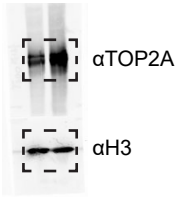

Blot 2 (for graph)

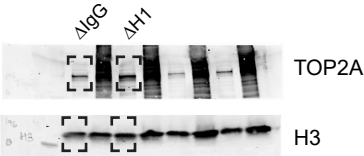

**Figure 1H**

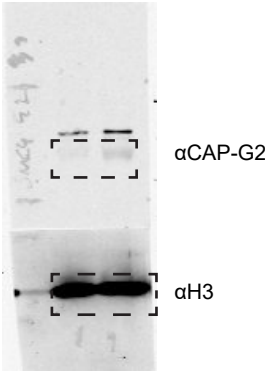

Supplement: supp [file elife-68918-supp-v1.zip]

**Figure 4-figure supplement 2A**

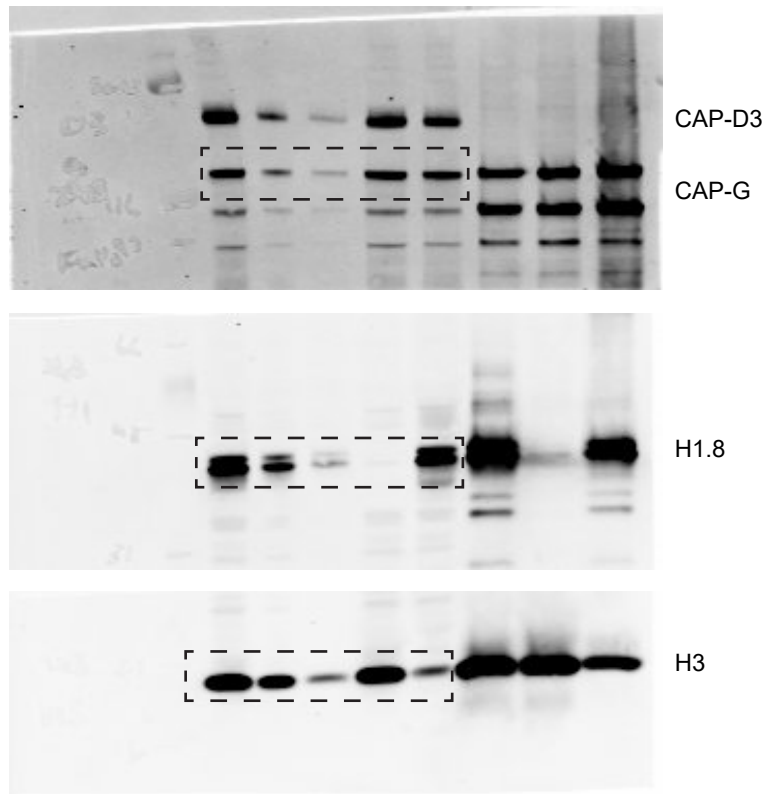

Supplement: supp [file elife-68918-supp-v1.zip]

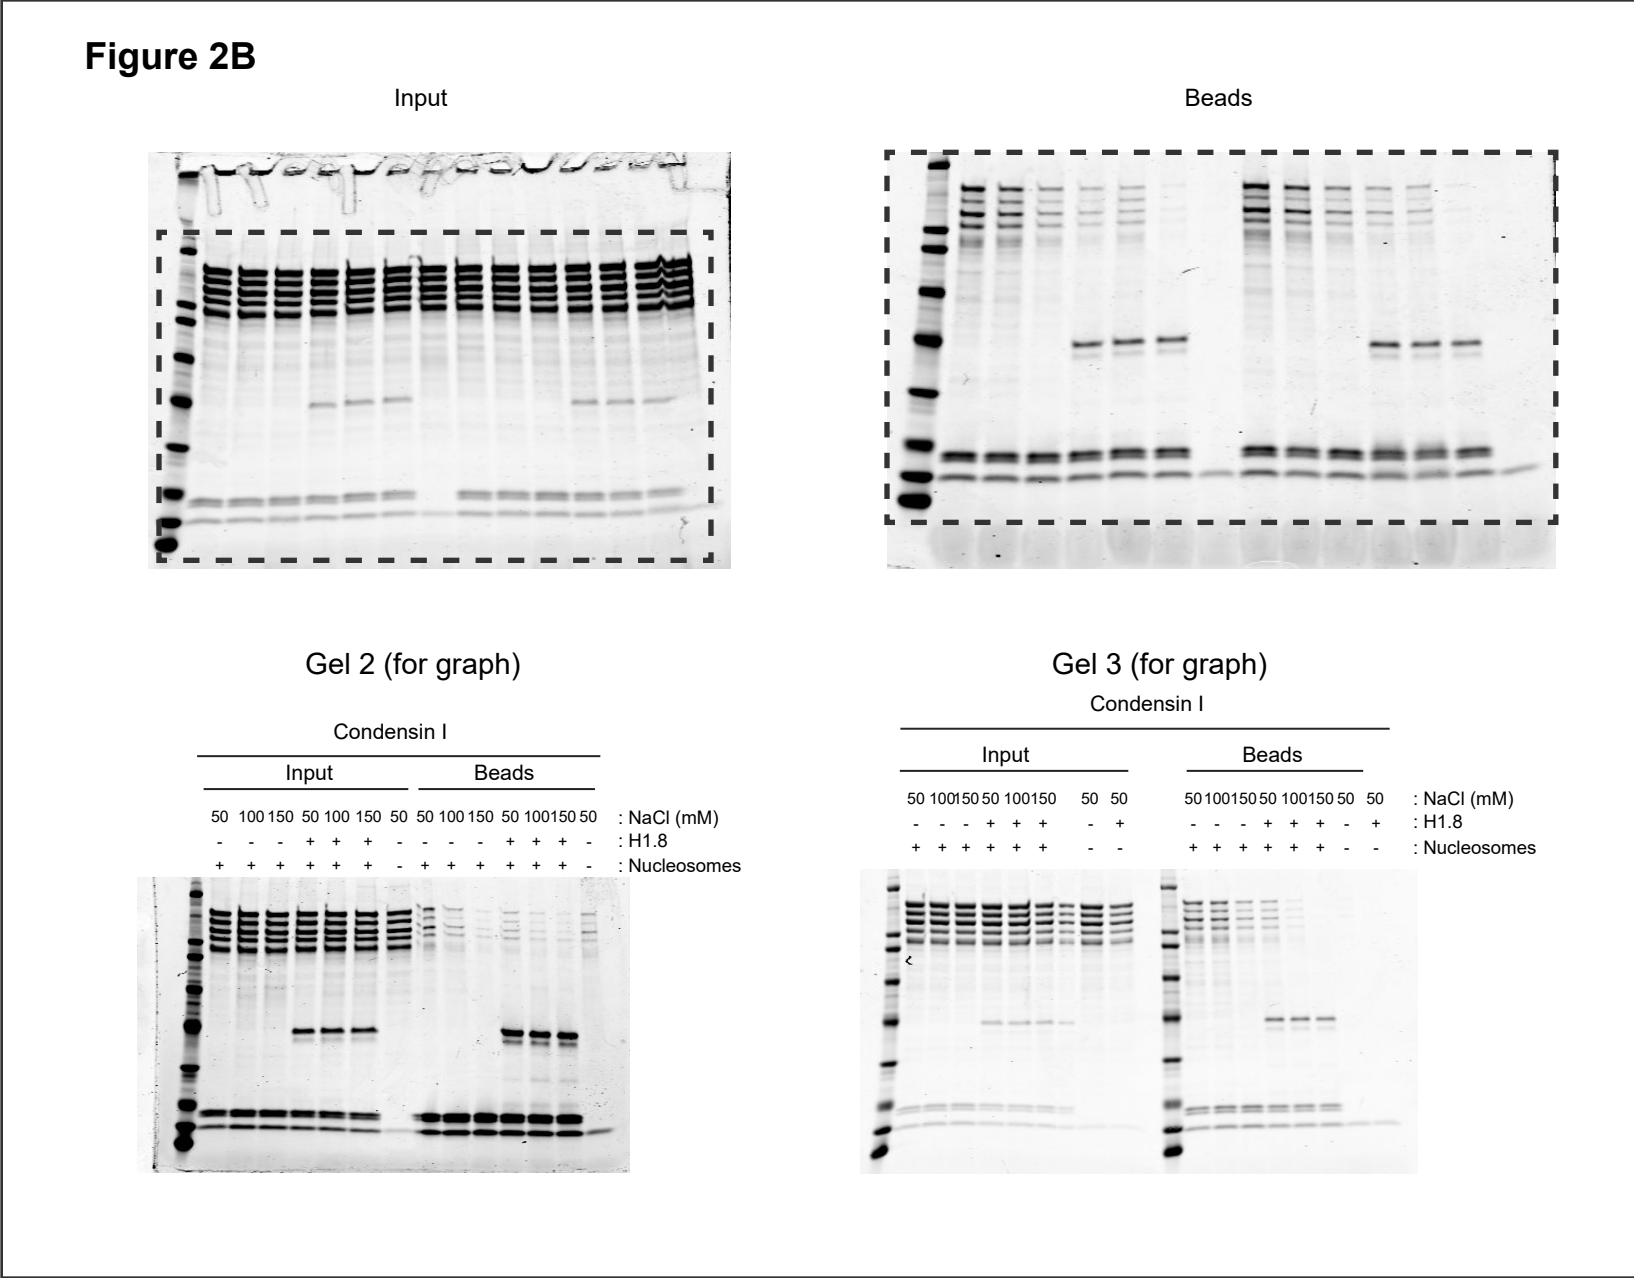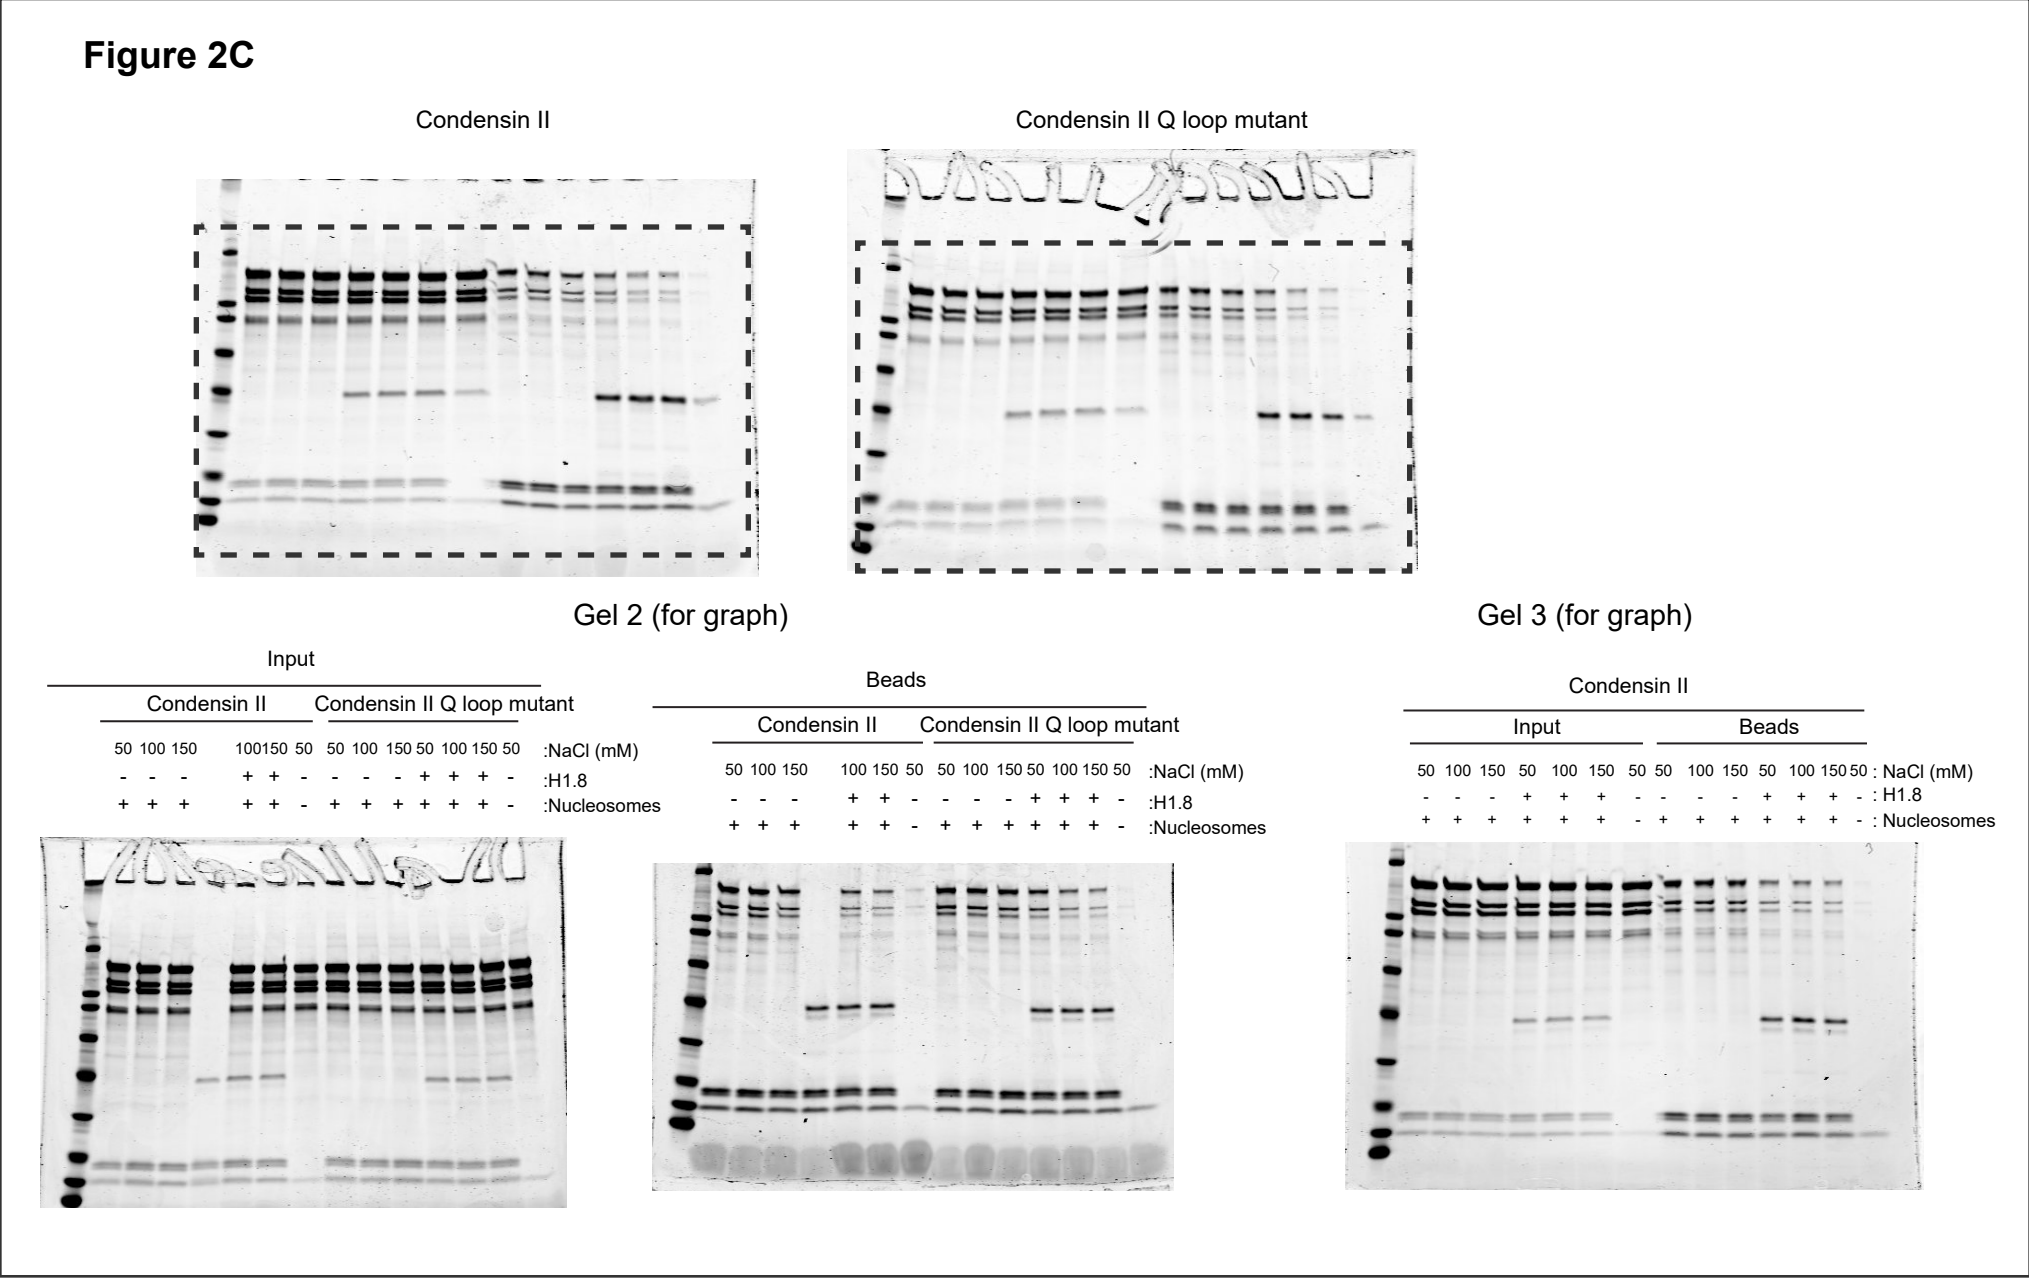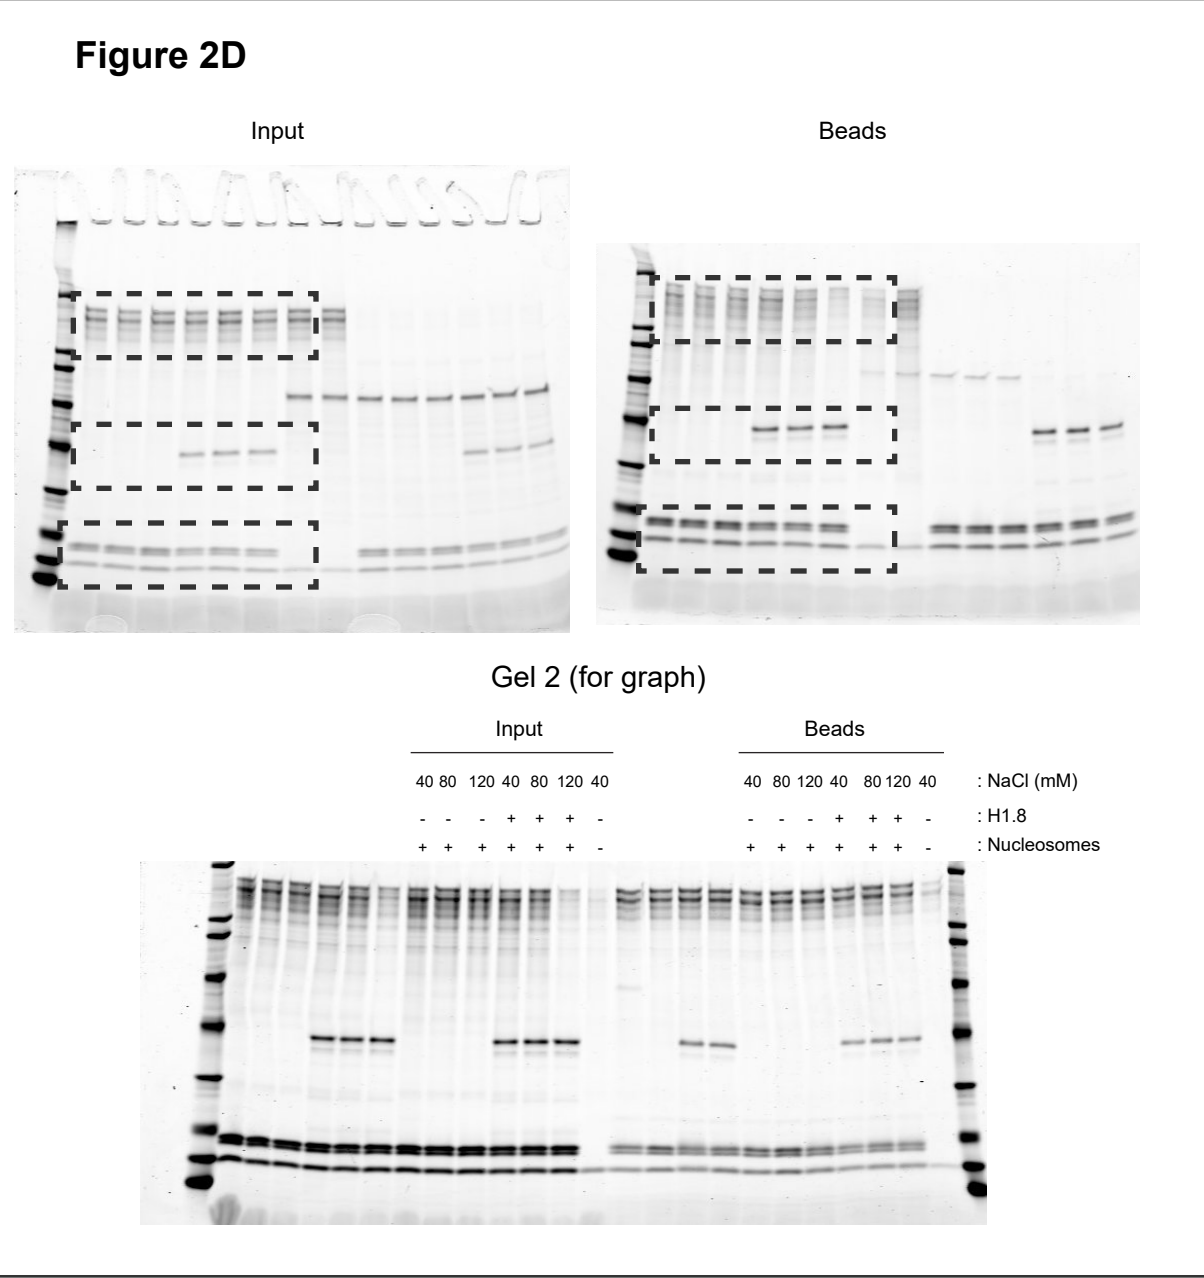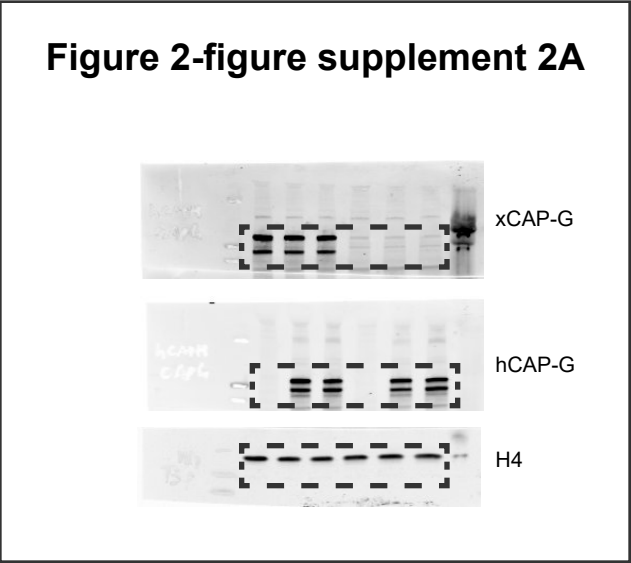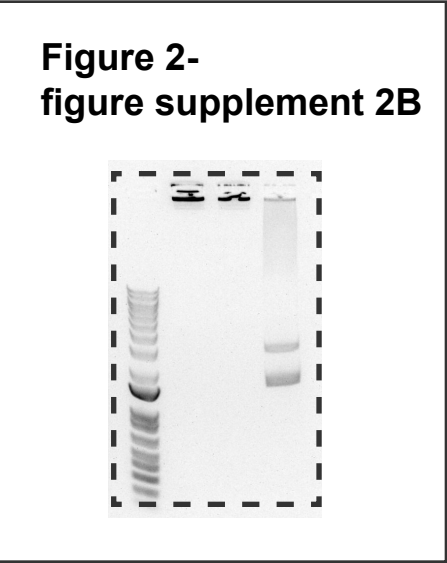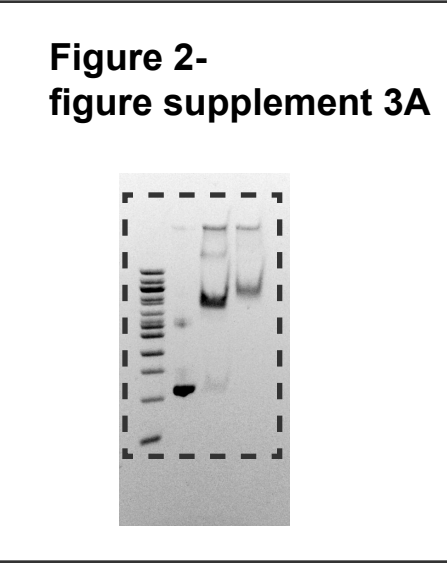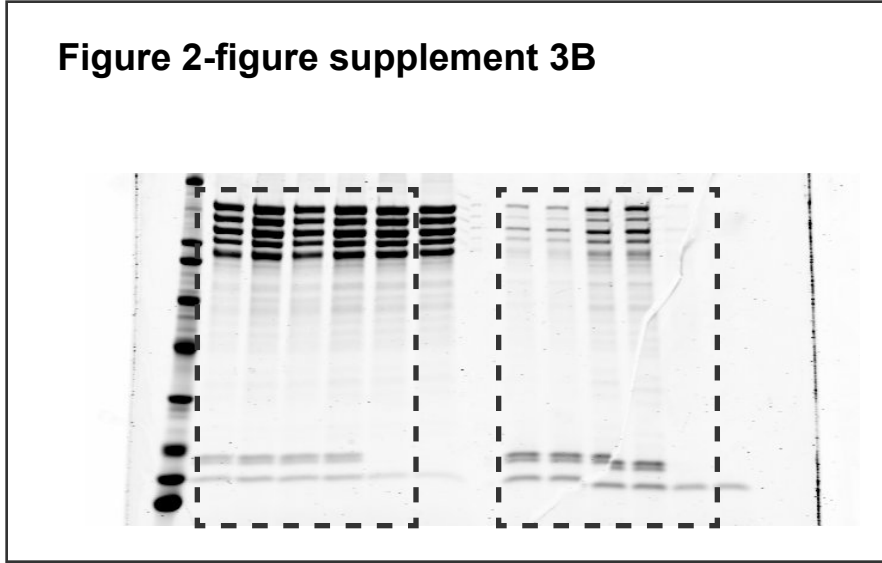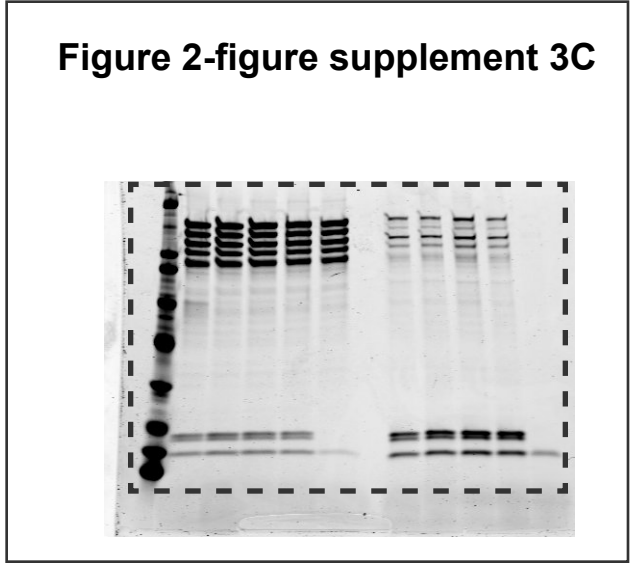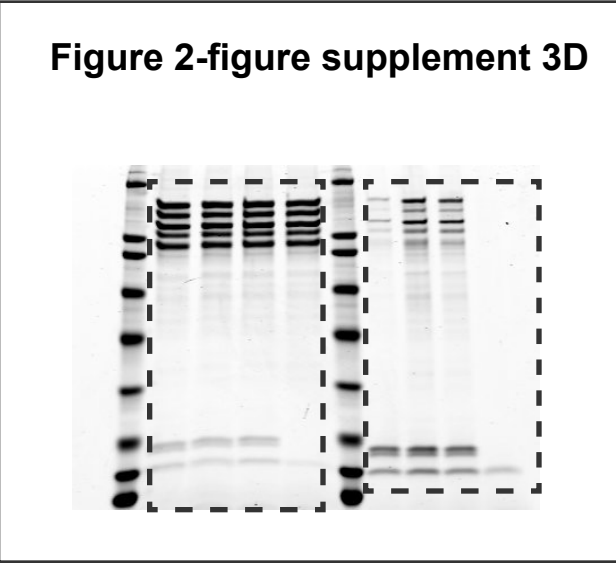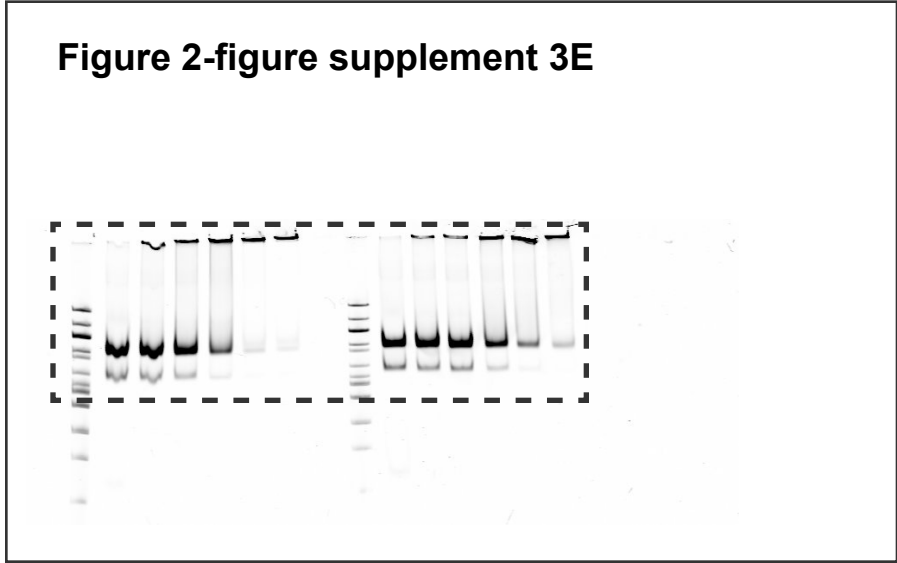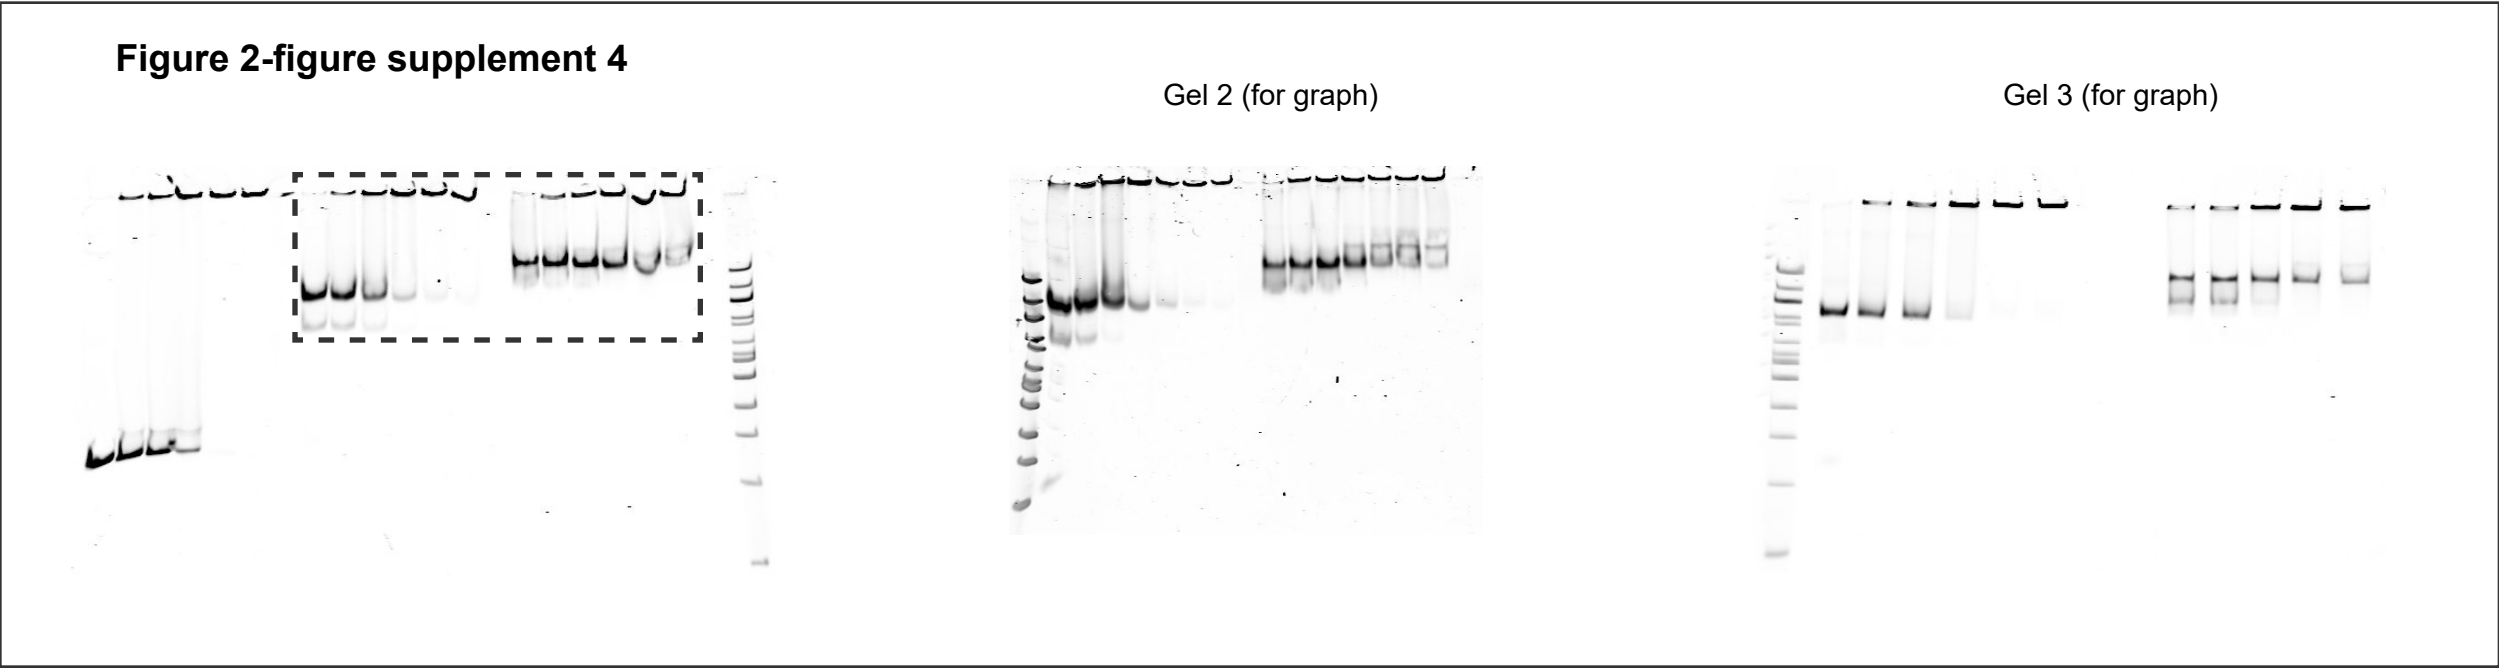

Supplement: supp [file elife-68918-supp-v1.zip]

**Figure 6A**

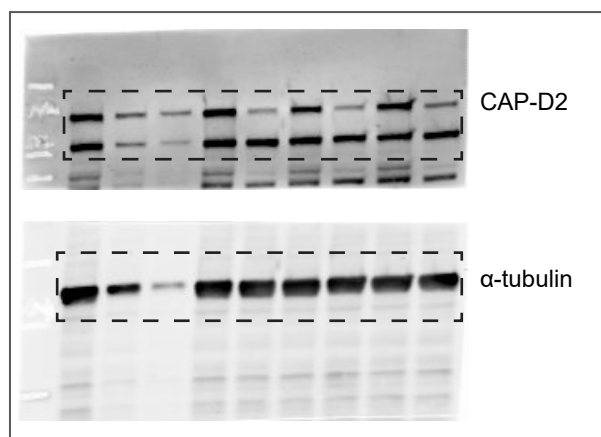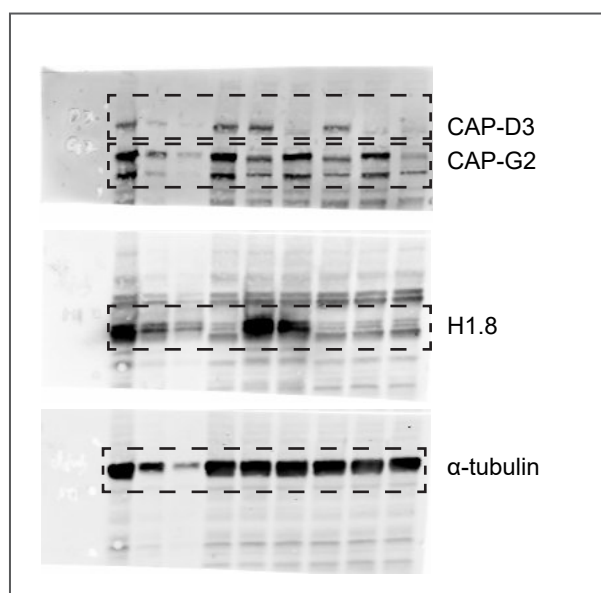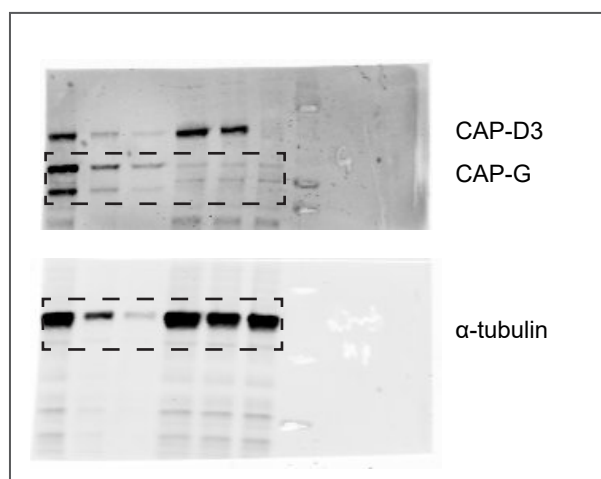

Supplement: supp [file elife-68918-supp-v1.zip]
